# Supplementary material for: Heterocyclic iodoniums as versatile synthons to approach diversified polycyclic heteroarenes
Source: PubMed Central journal article supplement (PMC9073335; doi:10.1039/c9ra07288h), 2019-10-16

# **Heterocyclic Iodoniums as Versatile Synthons to Approach Diversified Polycyclic Heteroarenes**

Daqian Zhu,<sup>ab</sup> Zhouming Wu,<sup>a</sup> Liyun Liang,<sup>a</sup> Yameng Sun,<sup>a</sup> Bingling Luo,<sup>a</sup> Peng Huang,<sup>a</sup> Shijun Wen<sup>\*a</sup>

<sup>a</sup>State Key Laboratory of Oncology in South China, Collaborative Innovation Center for Cancer Medicine, Sun Yat-sen University Cancer Center, 651 Dongfeng East Road, Guangzhou 510060.

<sup>b</sup>School of pharmacy, Guangdong Pharmaceutical University, 280 Waihuan East Road, Guangzhou 510006, China

Contents

|                                                                   |    |
|-------------------------------------------------------------------|----|
| Studies on the reaction of <b>1a</b> and <i>p</i> -anisidine..... | S1 |
| NMR Spectra .....                                                 | S2 |

**Table S1.** Studies on the reaction of **1a** and *p*-anisidine

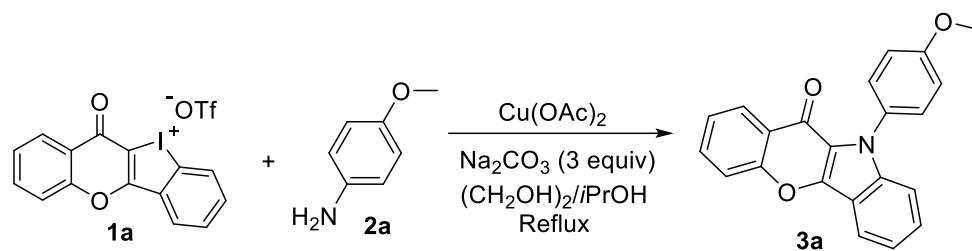

| Entry | <b>2a</b> (equiv) | $\text{Cu}(\text{OAc})_2$ (equiv) | Yield (%) |
|-------|-------------------|-----------------------------------|-----------|
| 1     | 1.5               | 0.2                               | 32        |
| 2     | 2.5               | 0.2                               | 86        |
| 3     | 3                 | 0.2                               | 87        |
| 4     | 4                 | 0.2                               | 90        |
| 5     | 2.5               | 0.1                               | 84        |

Synthesize heterocycle-fused indoles with heterocyclic iodonium **1a** and *p*-anisidine. Reaction conditions: **1a** (0.1 mmol), *p*-anisidine (2.5 equiv), *i*-PrOH/ $(\text{CH}_2\text{OH})_2$  (0.9/0.1mL), refluxing, Ar, 16 h.

# NMR Spectra

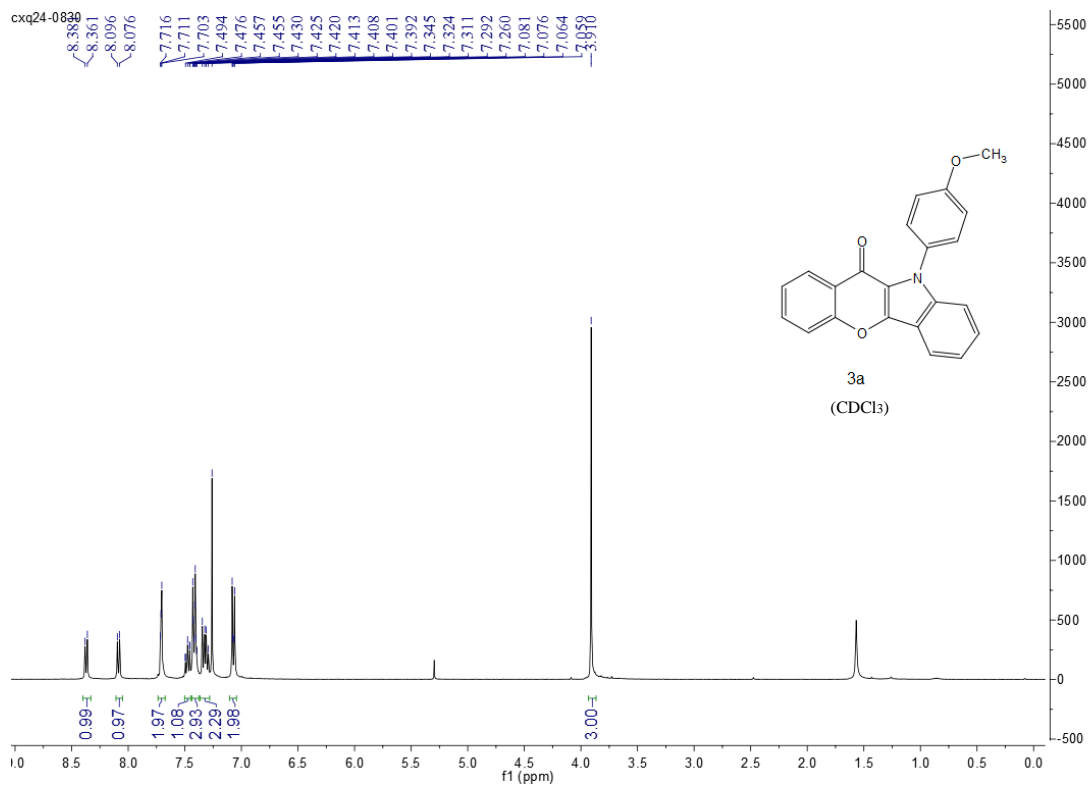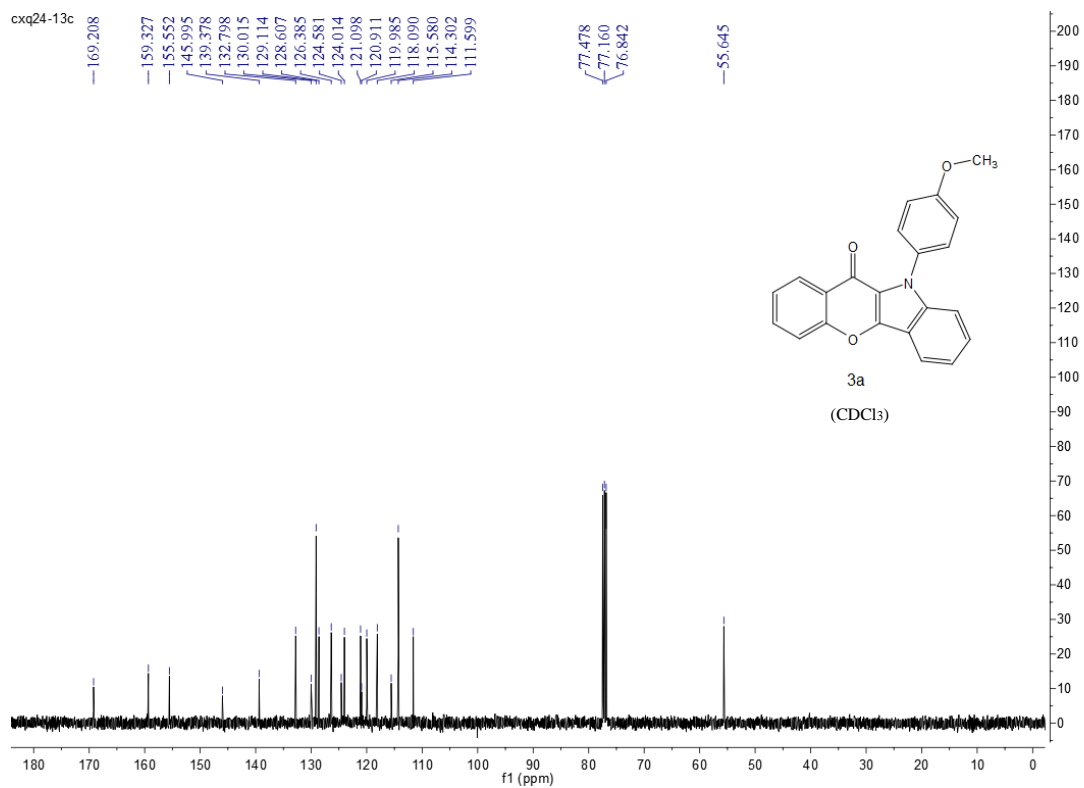

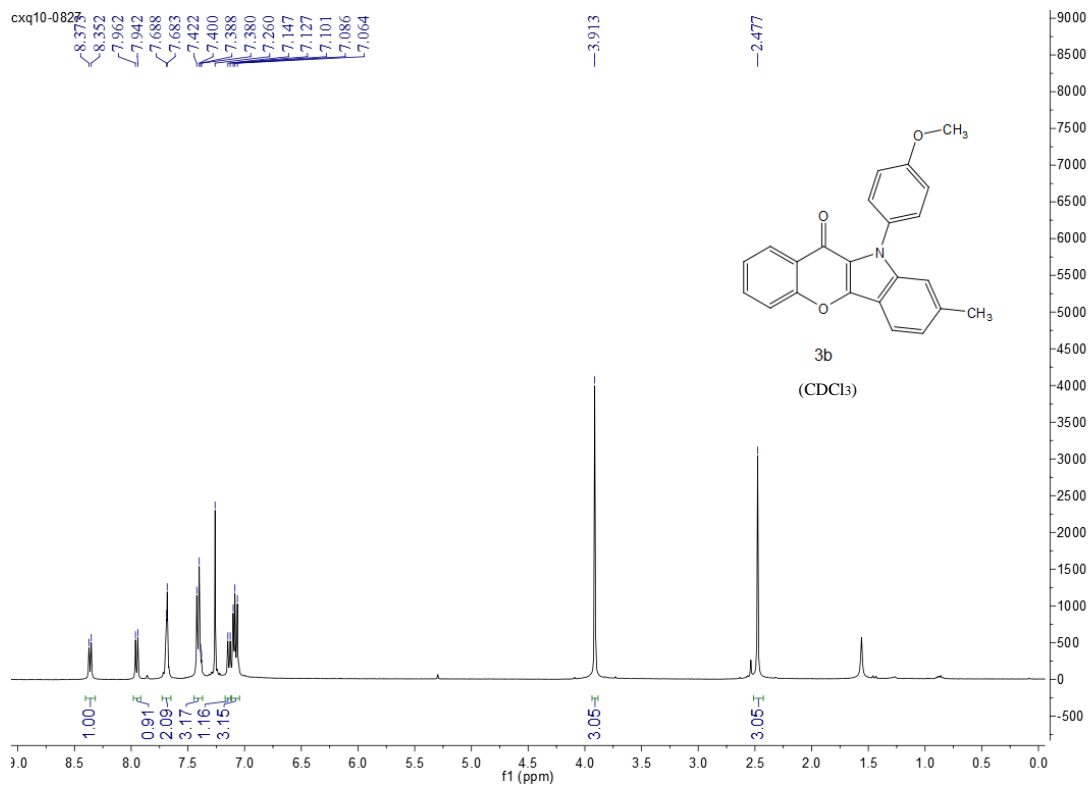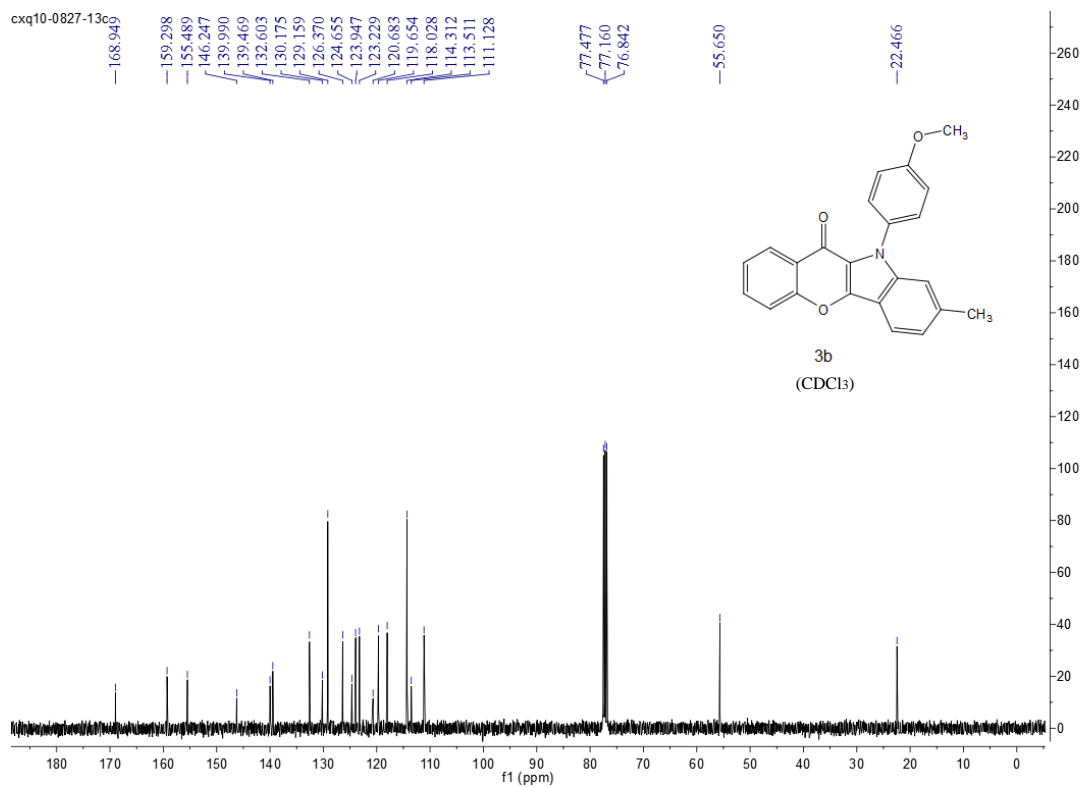

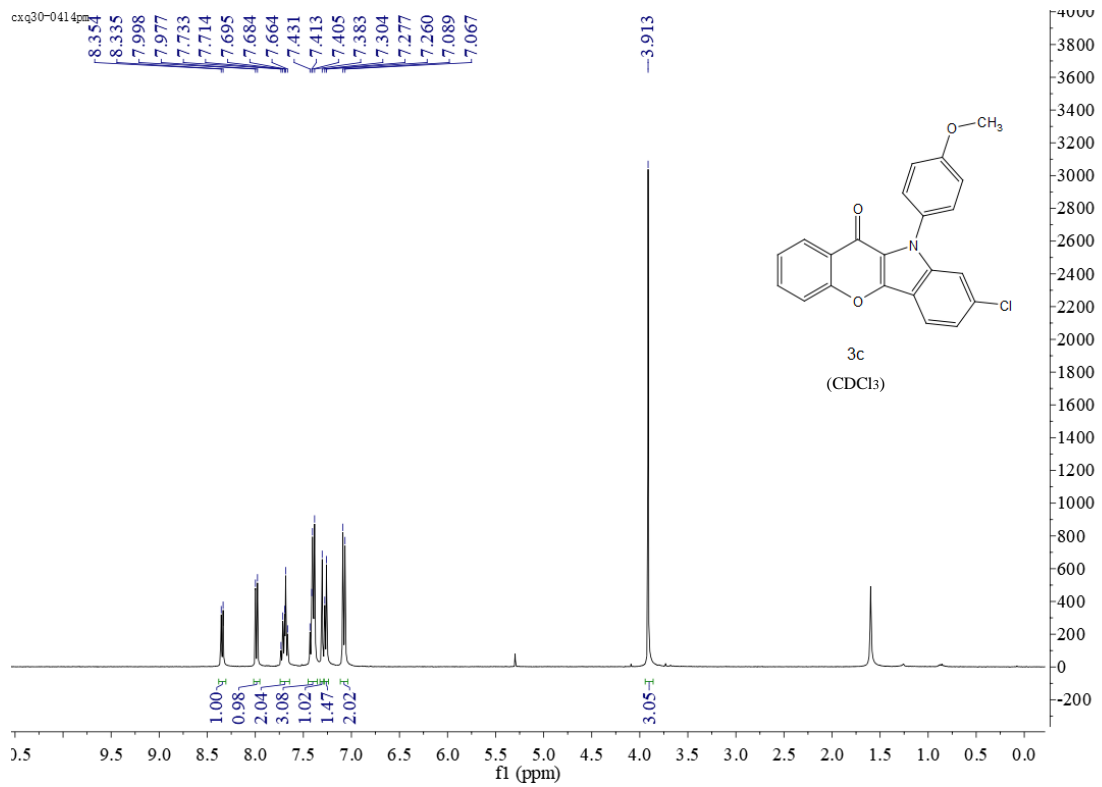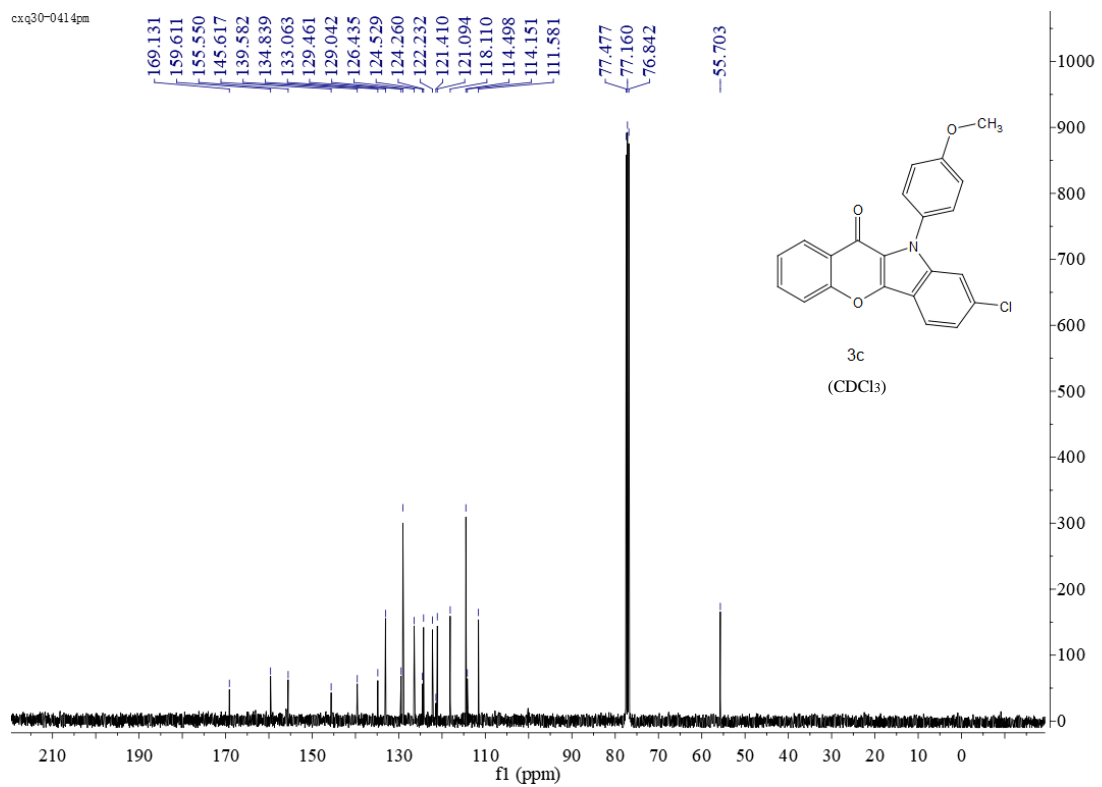

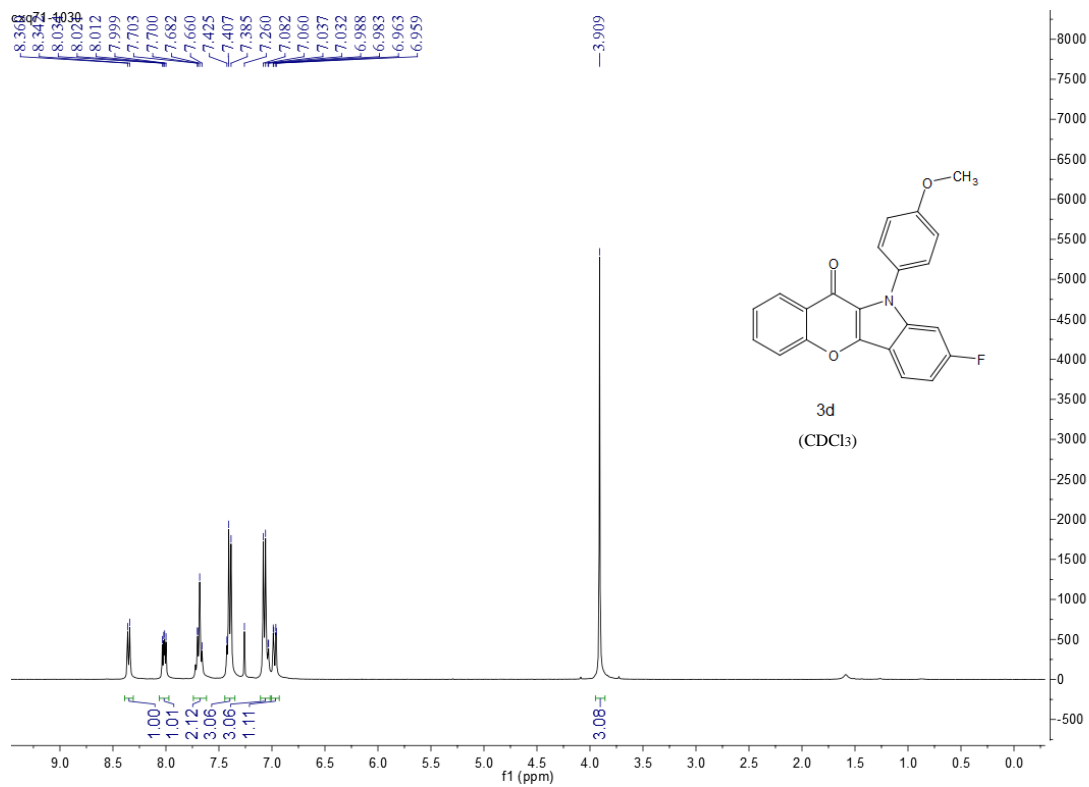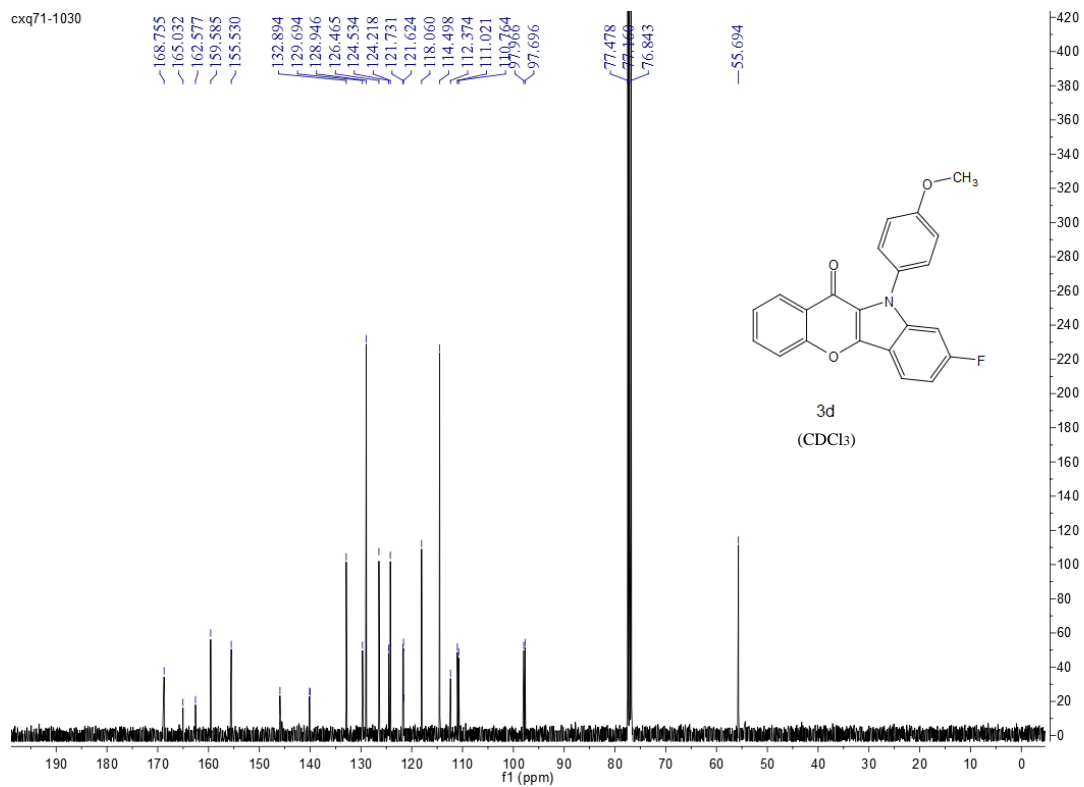

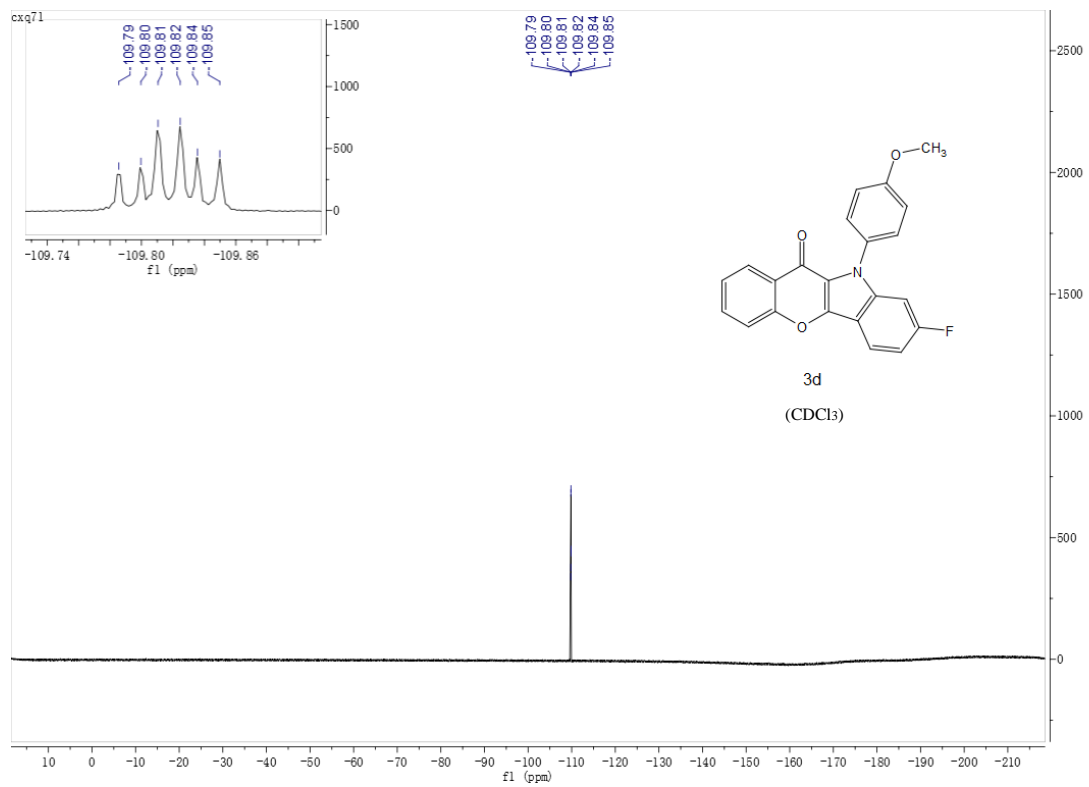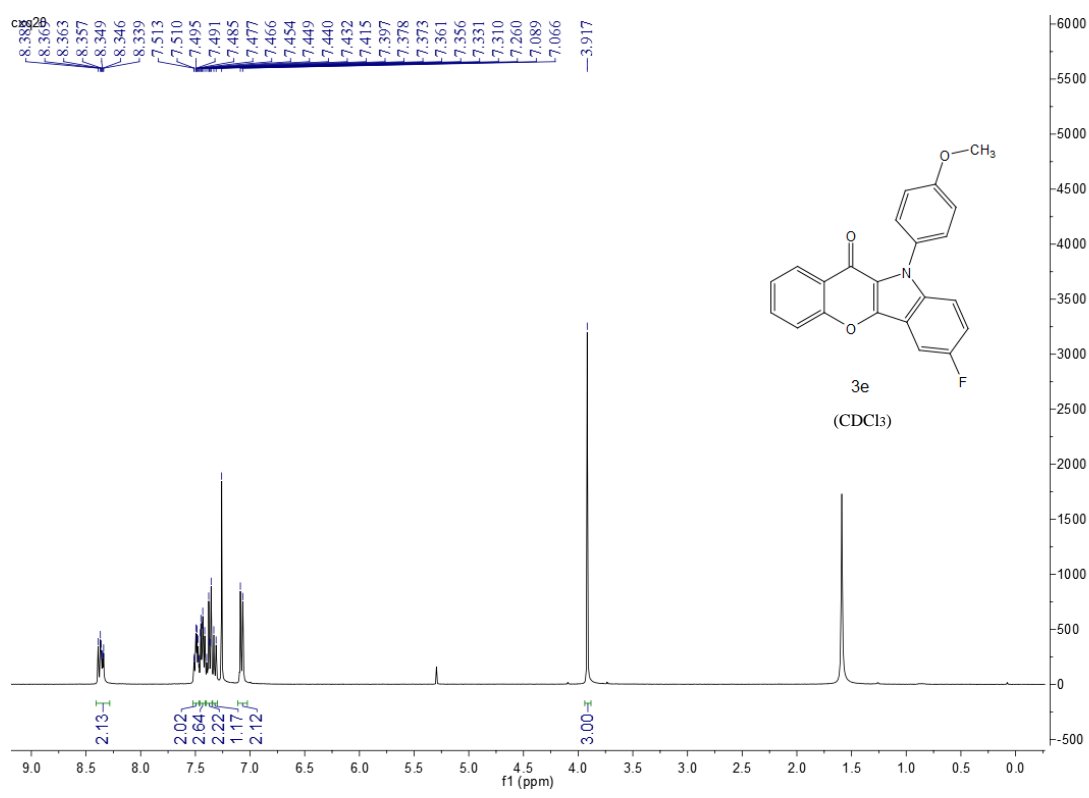



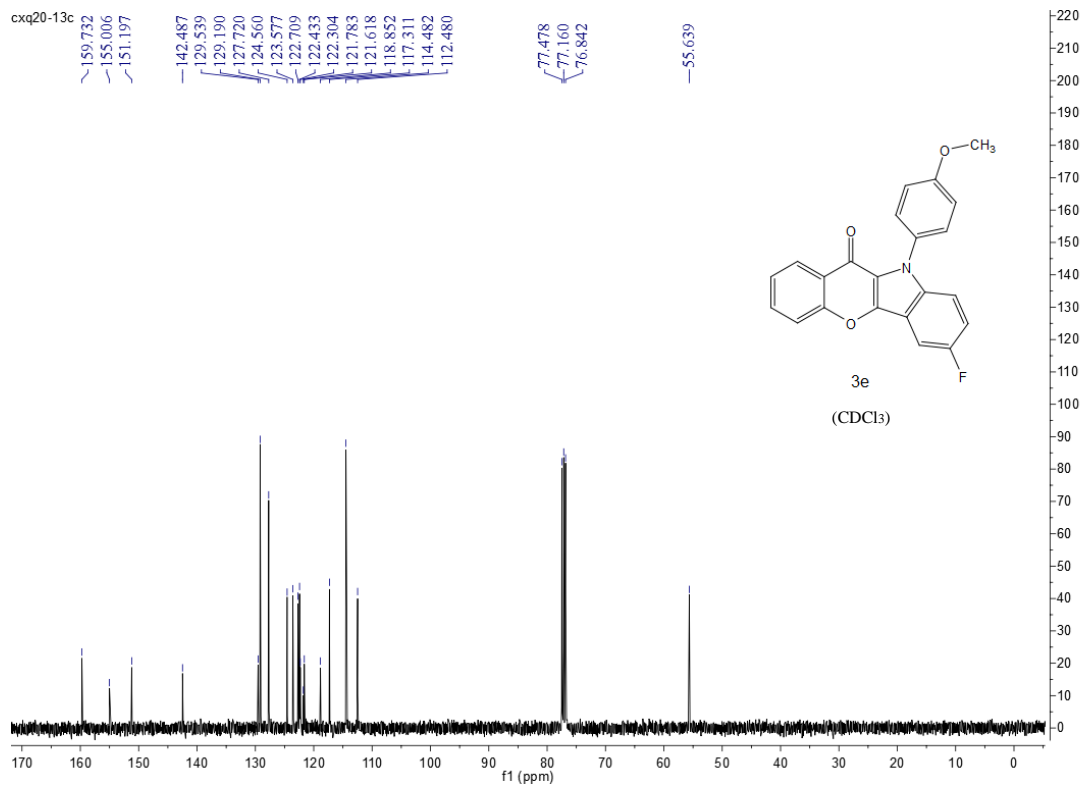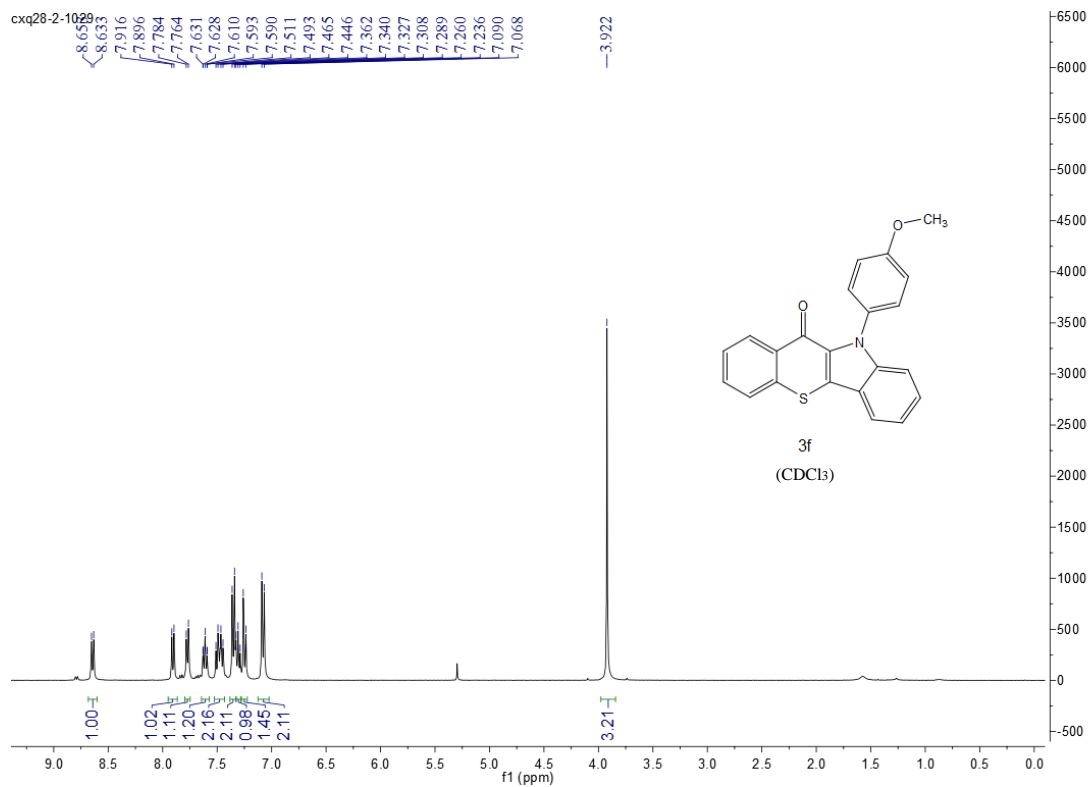

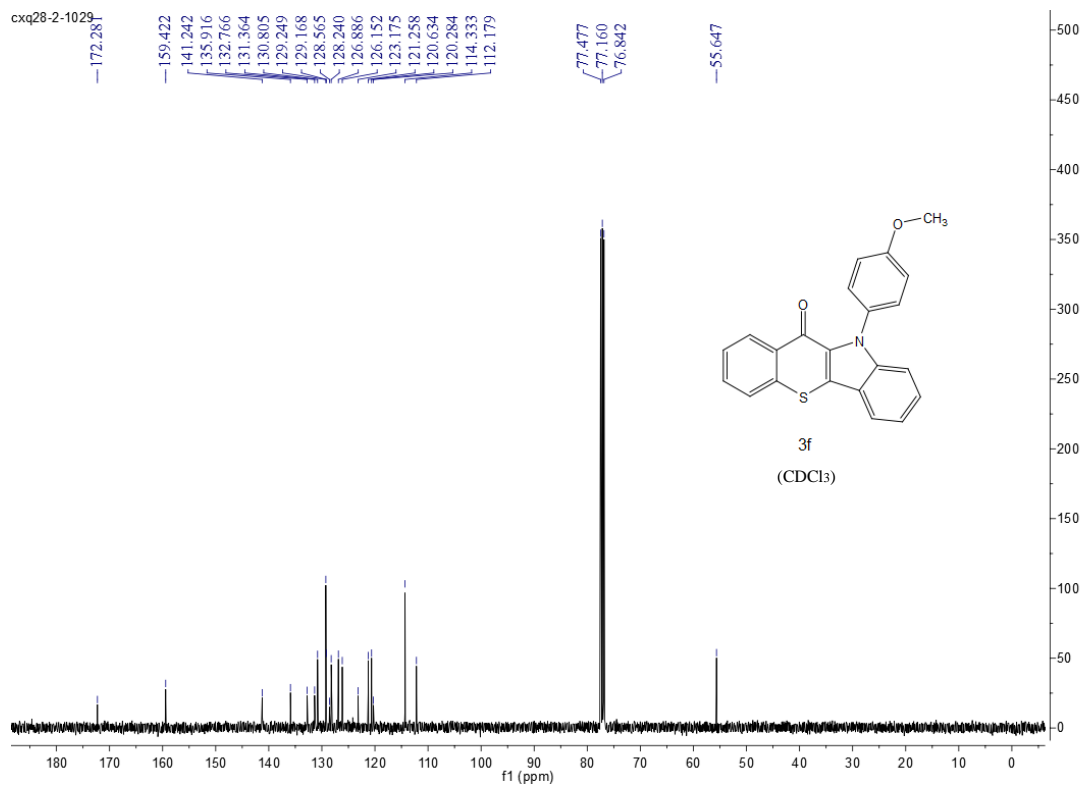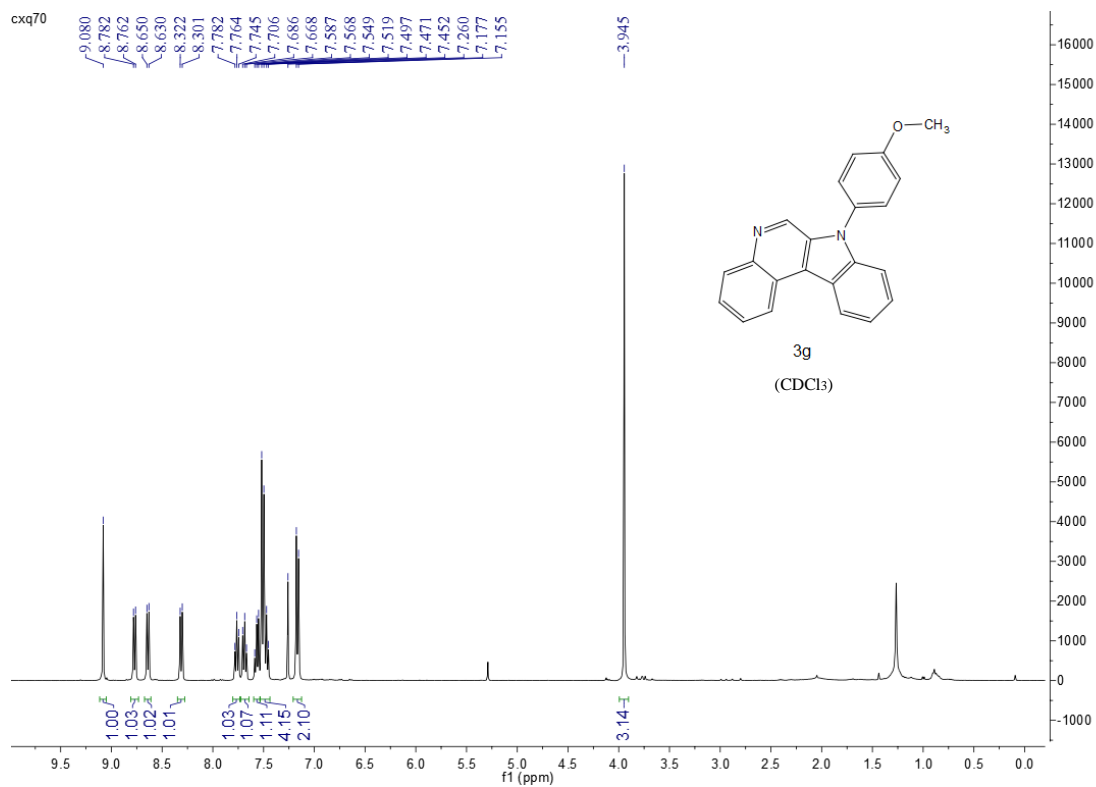

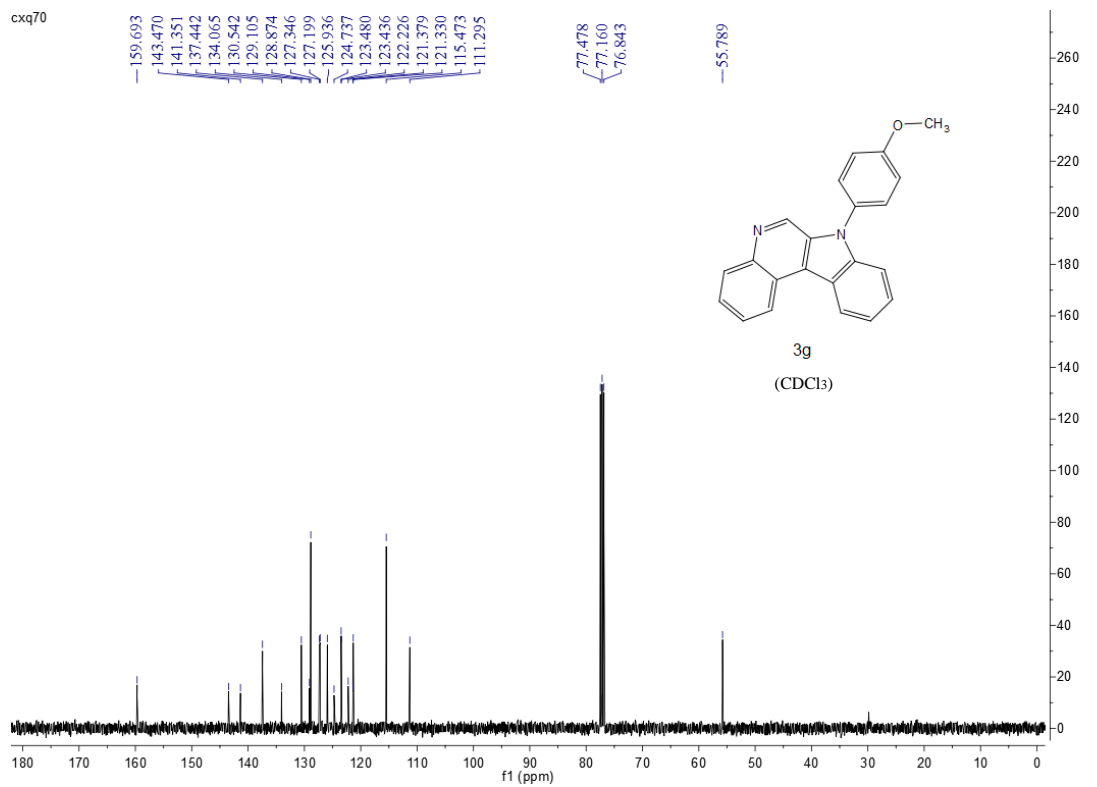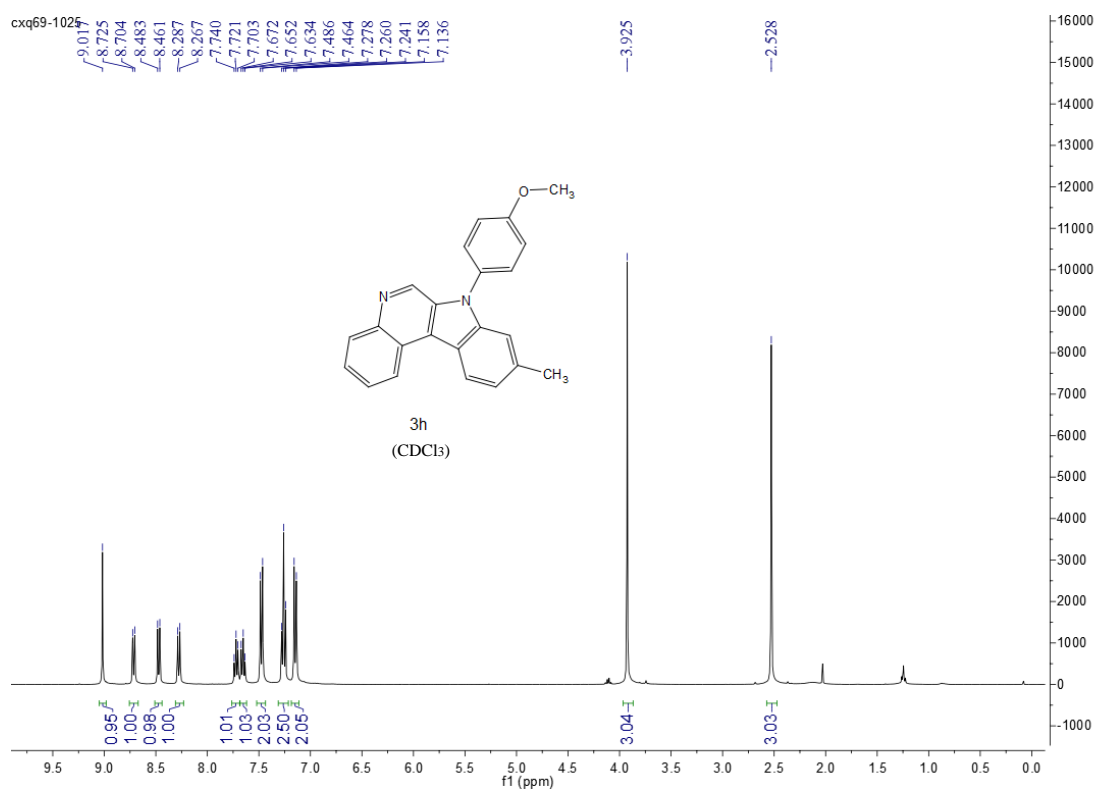

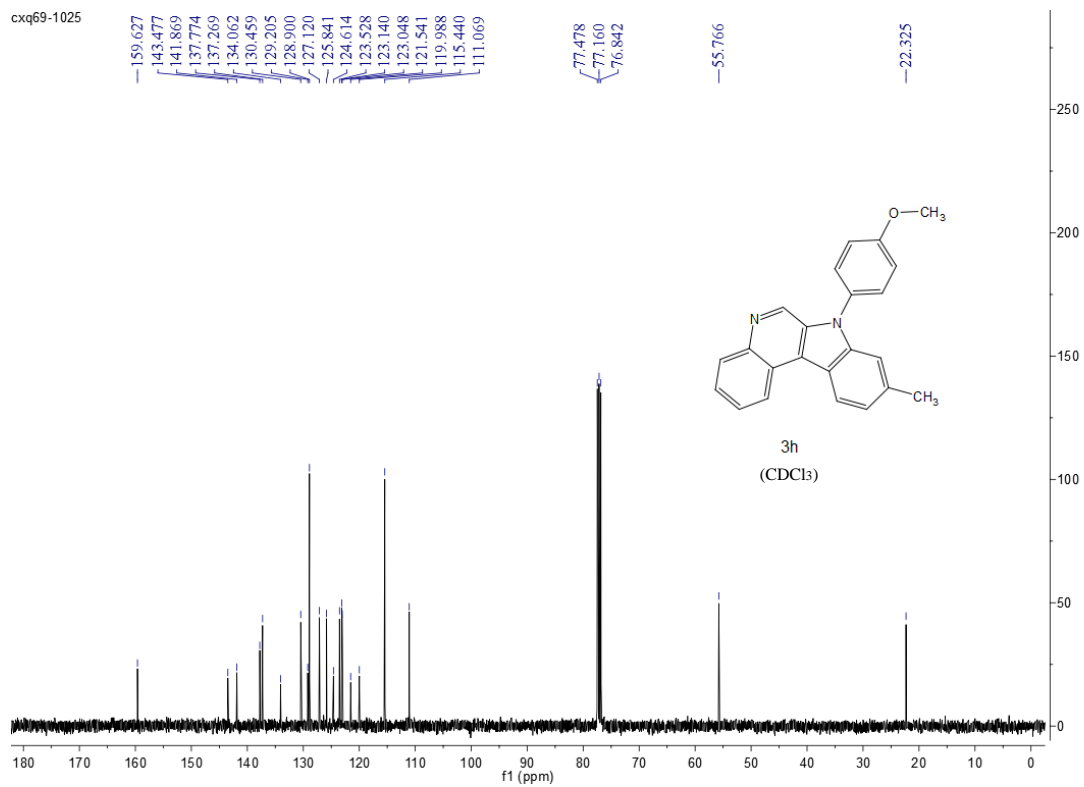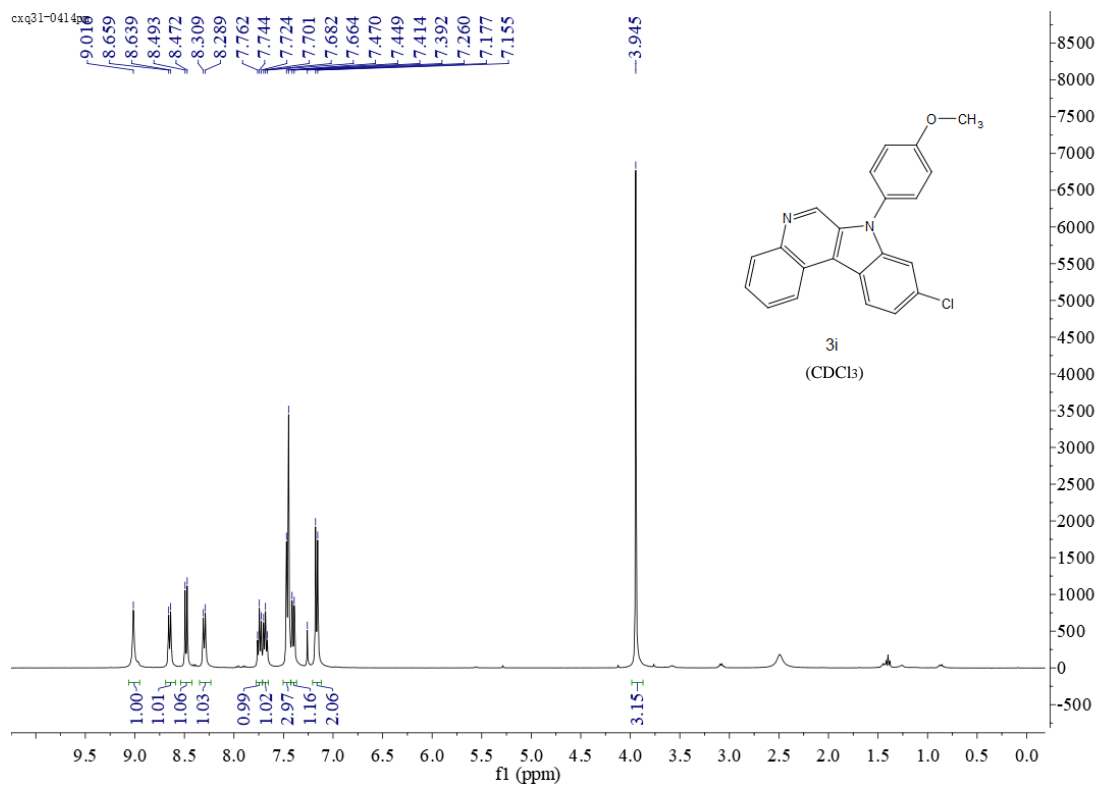

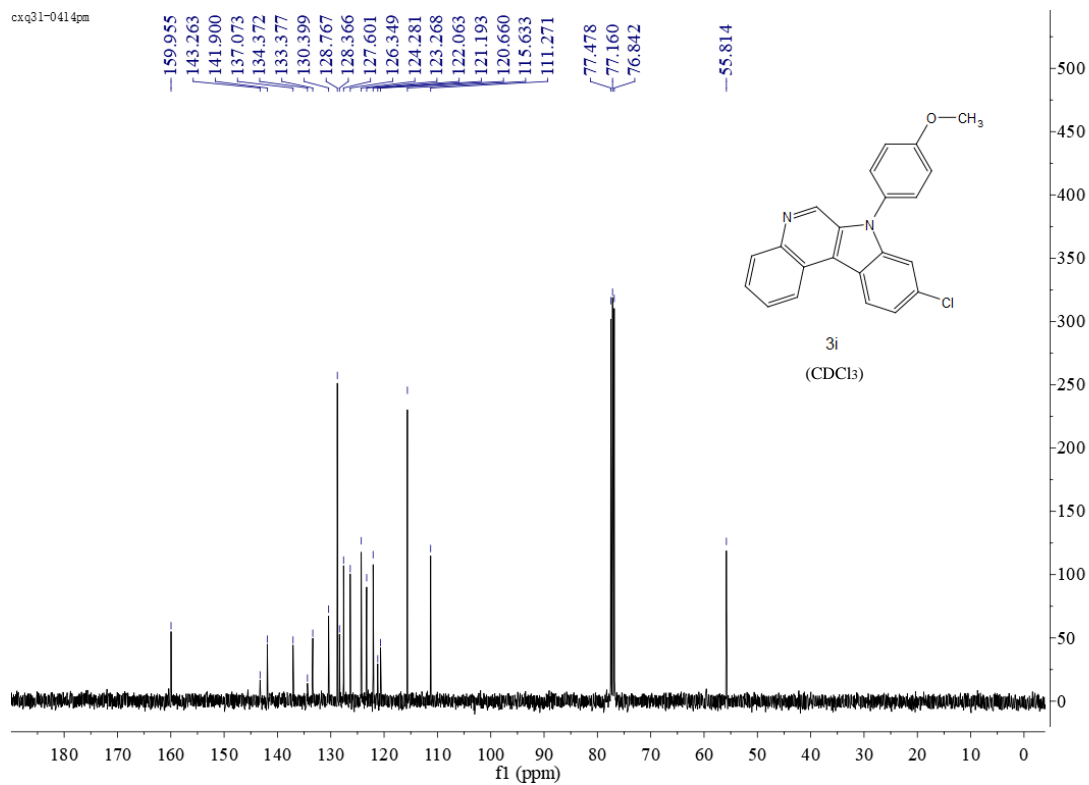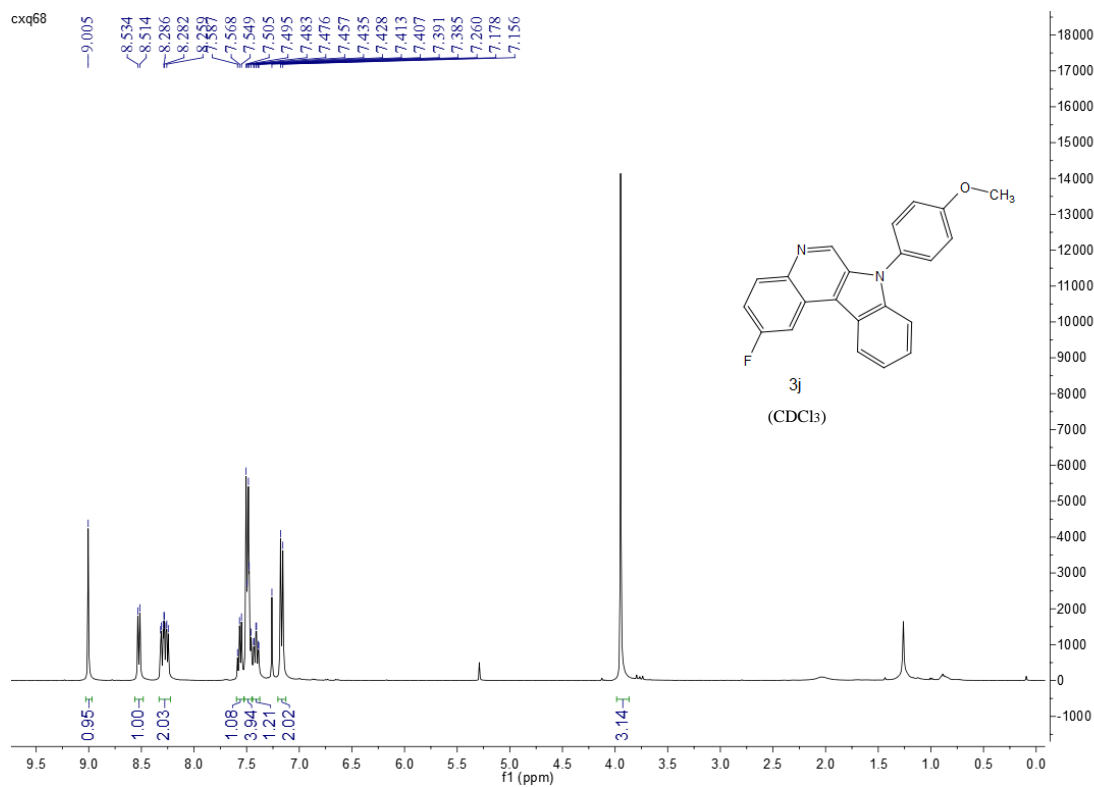

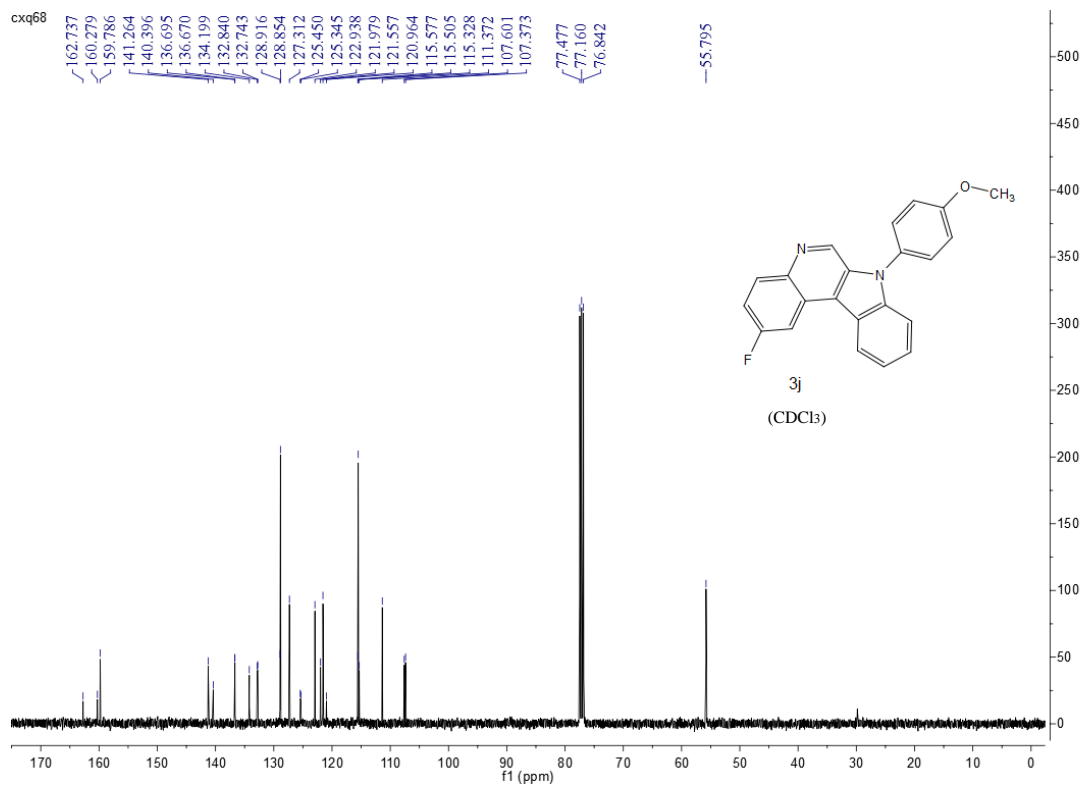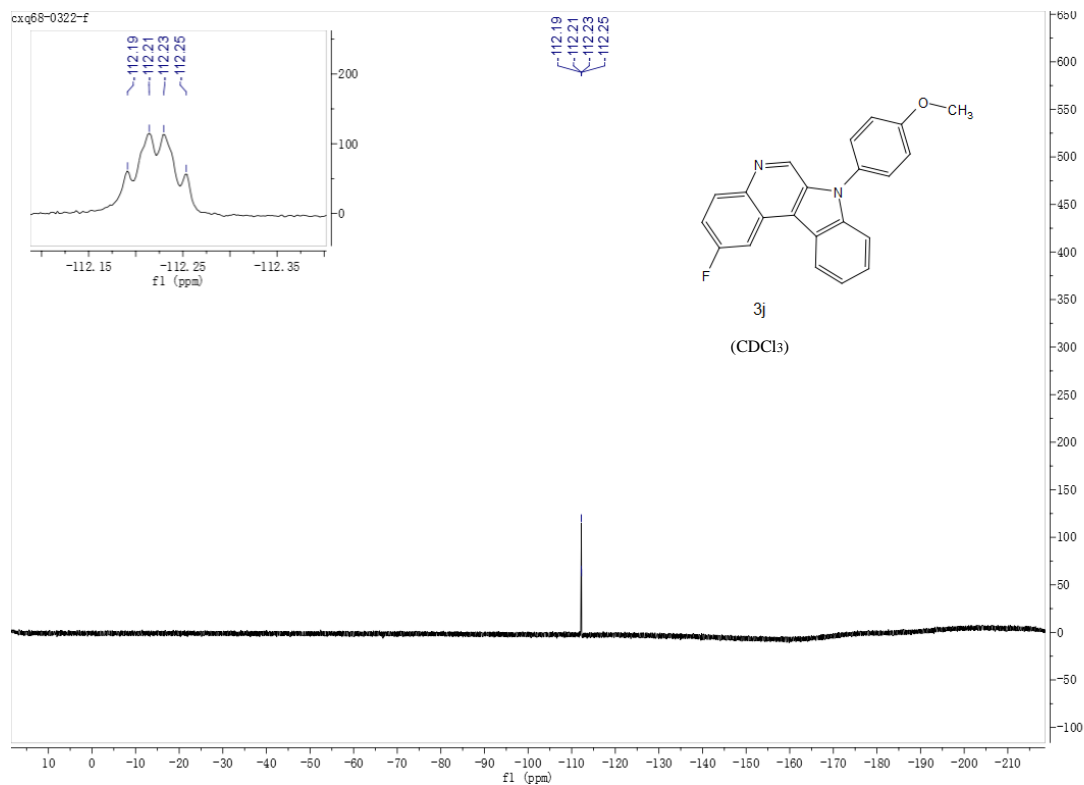

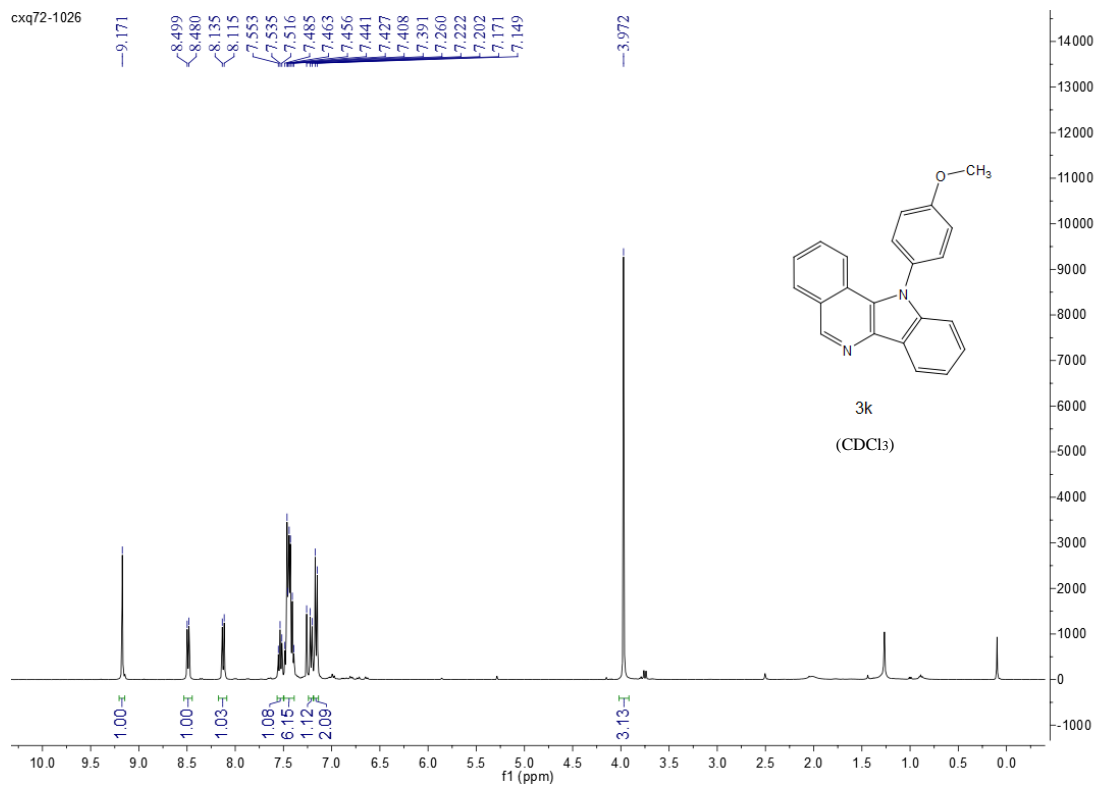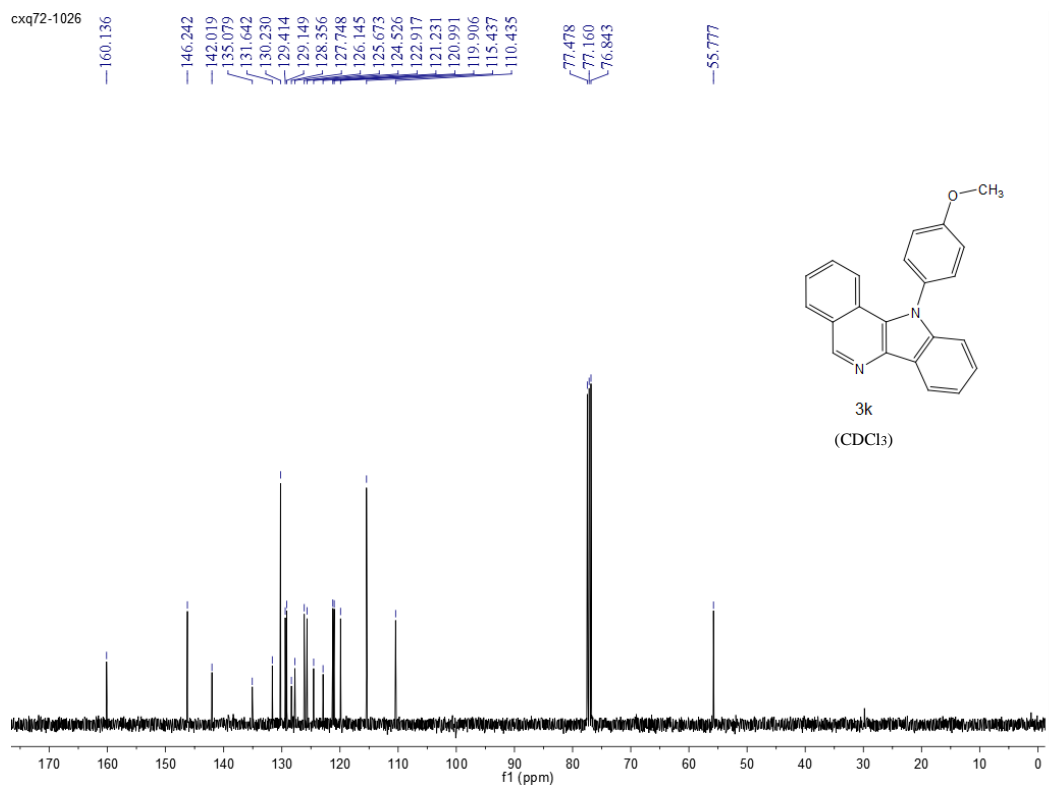

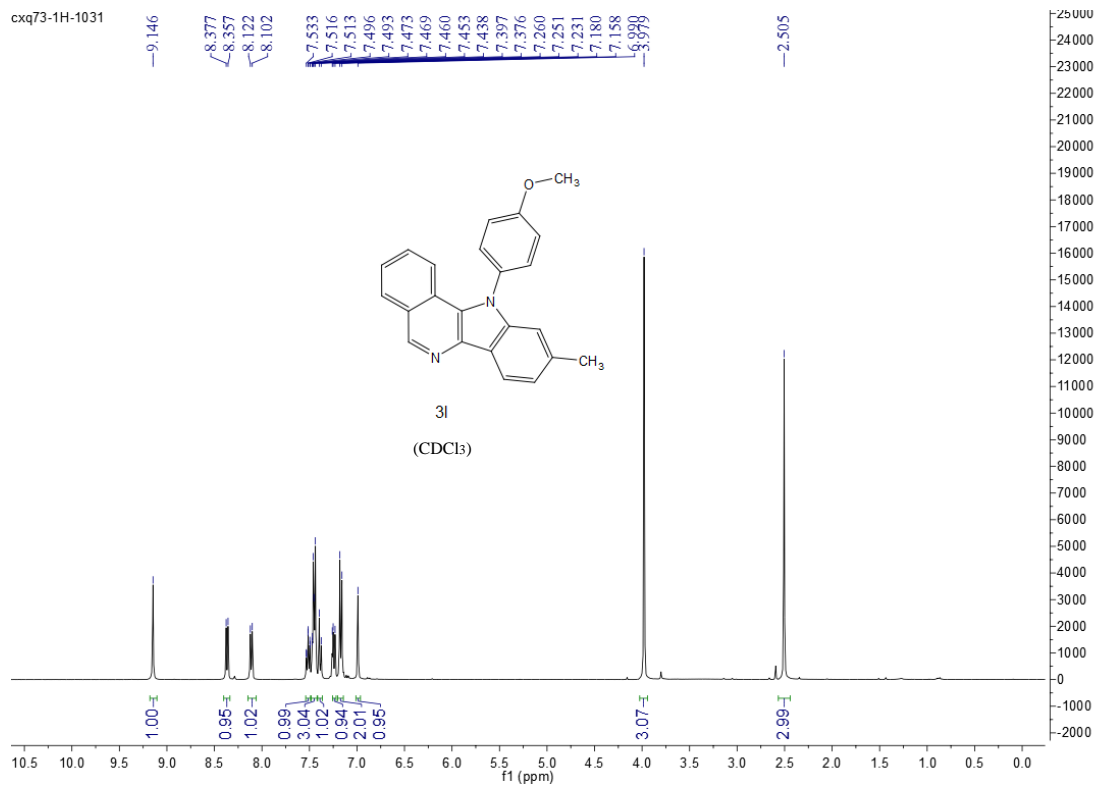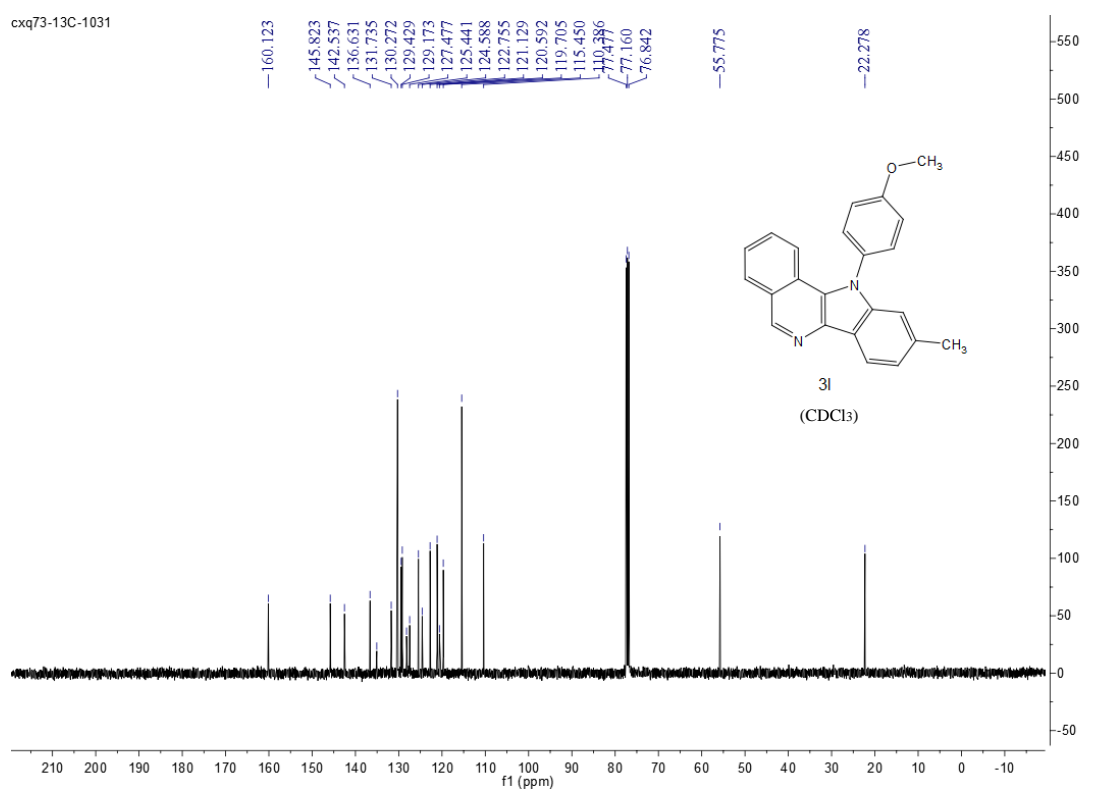



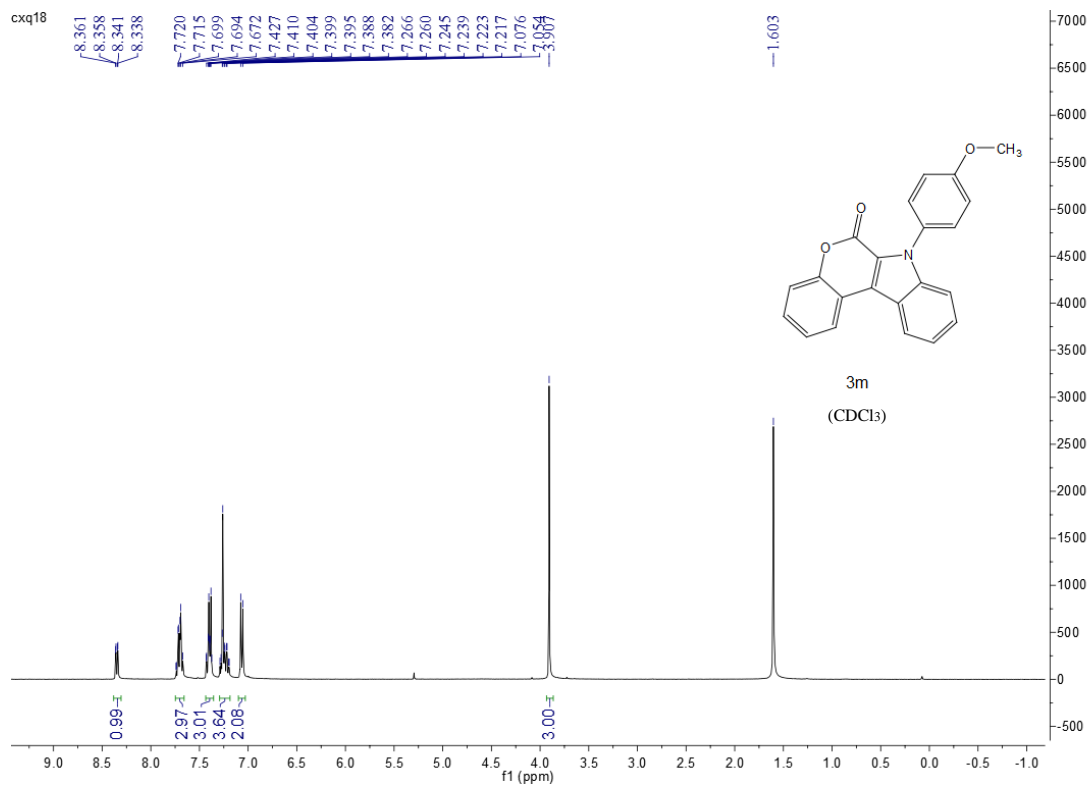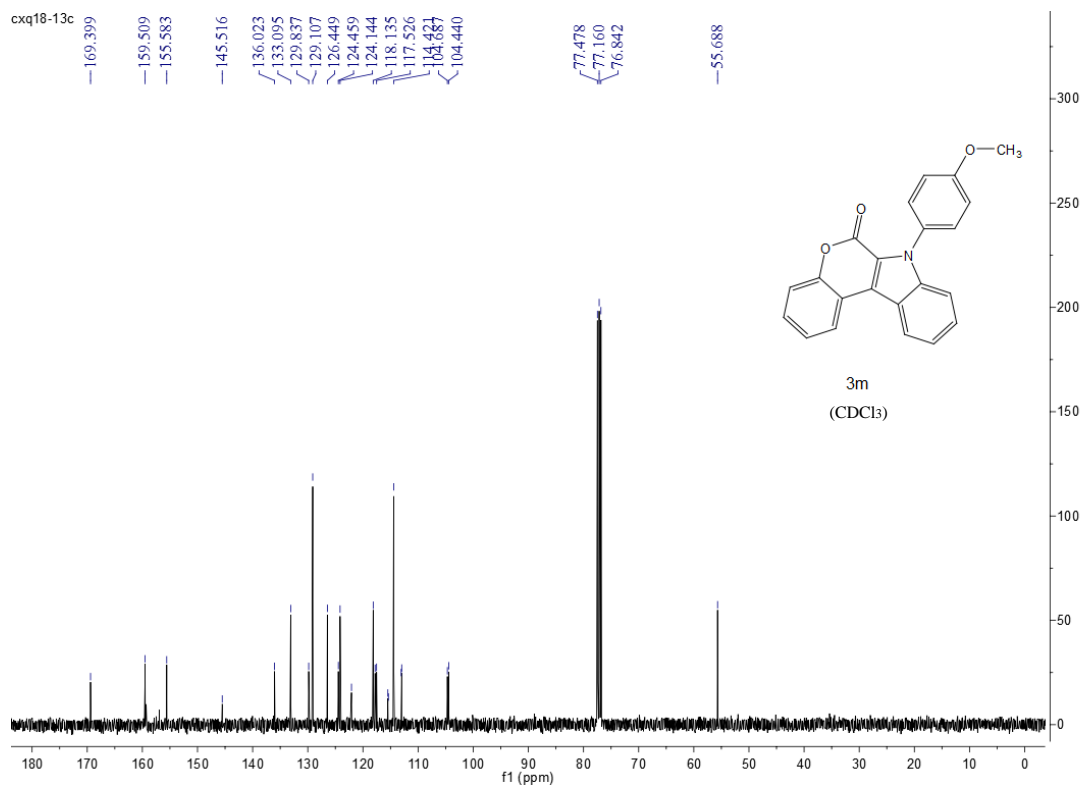

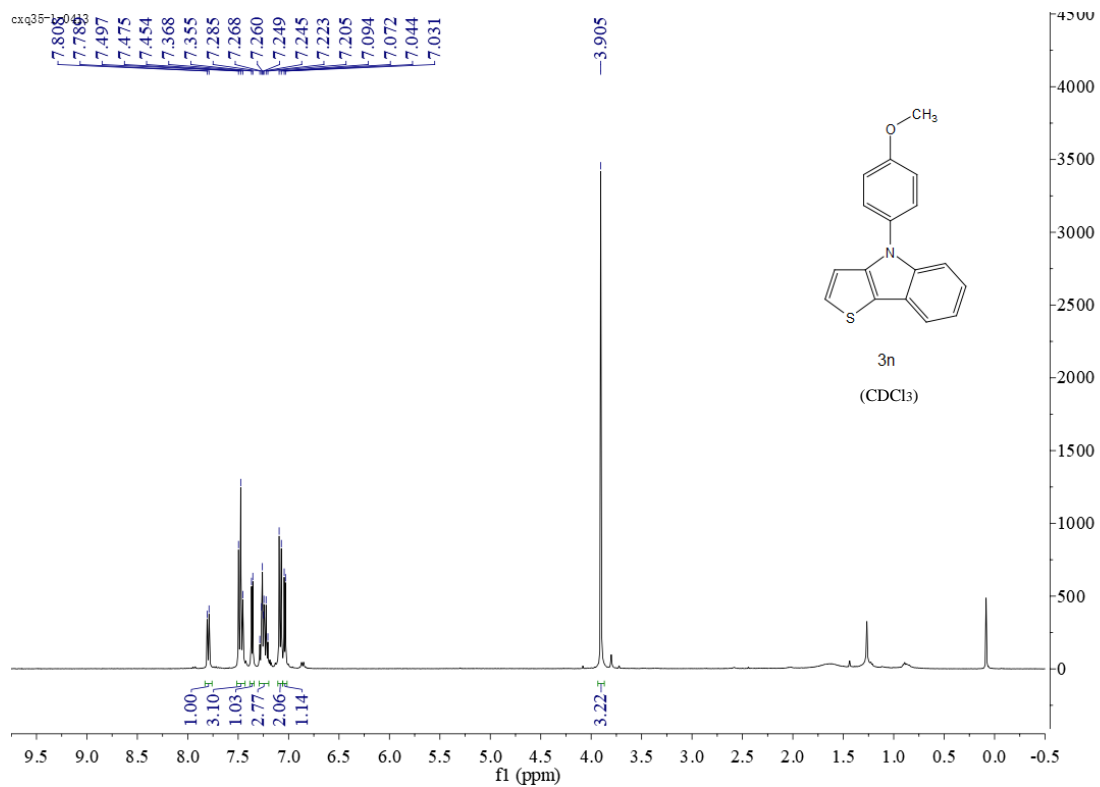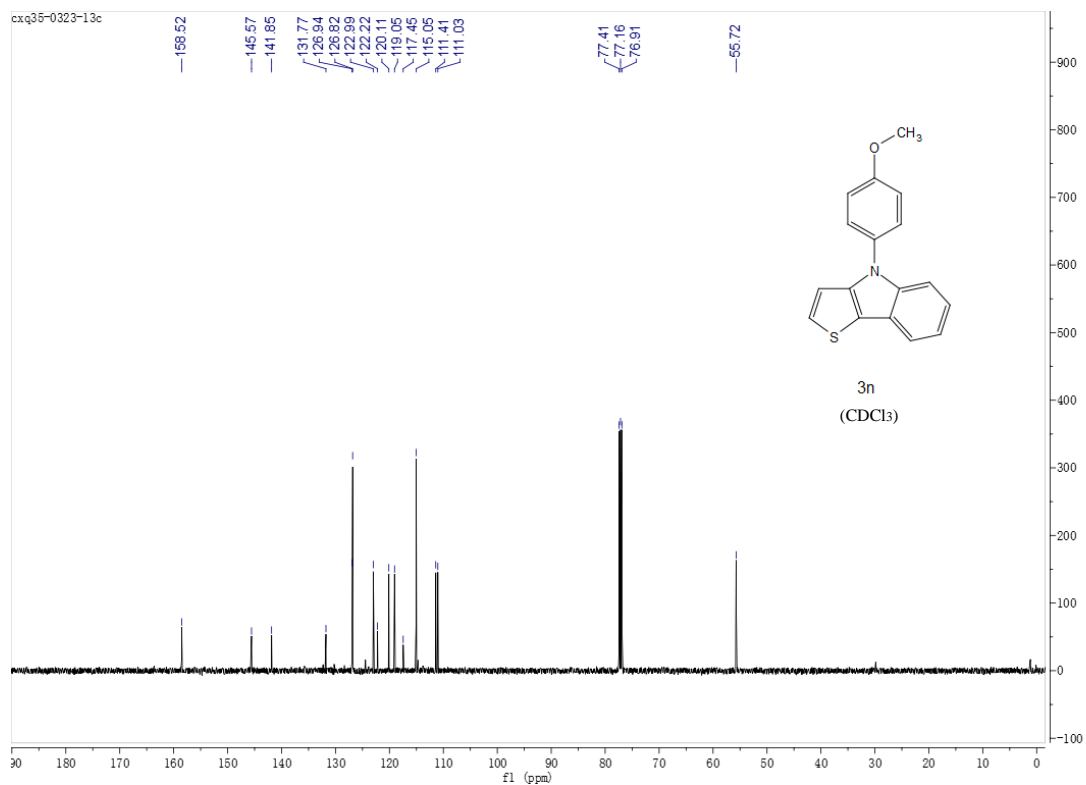

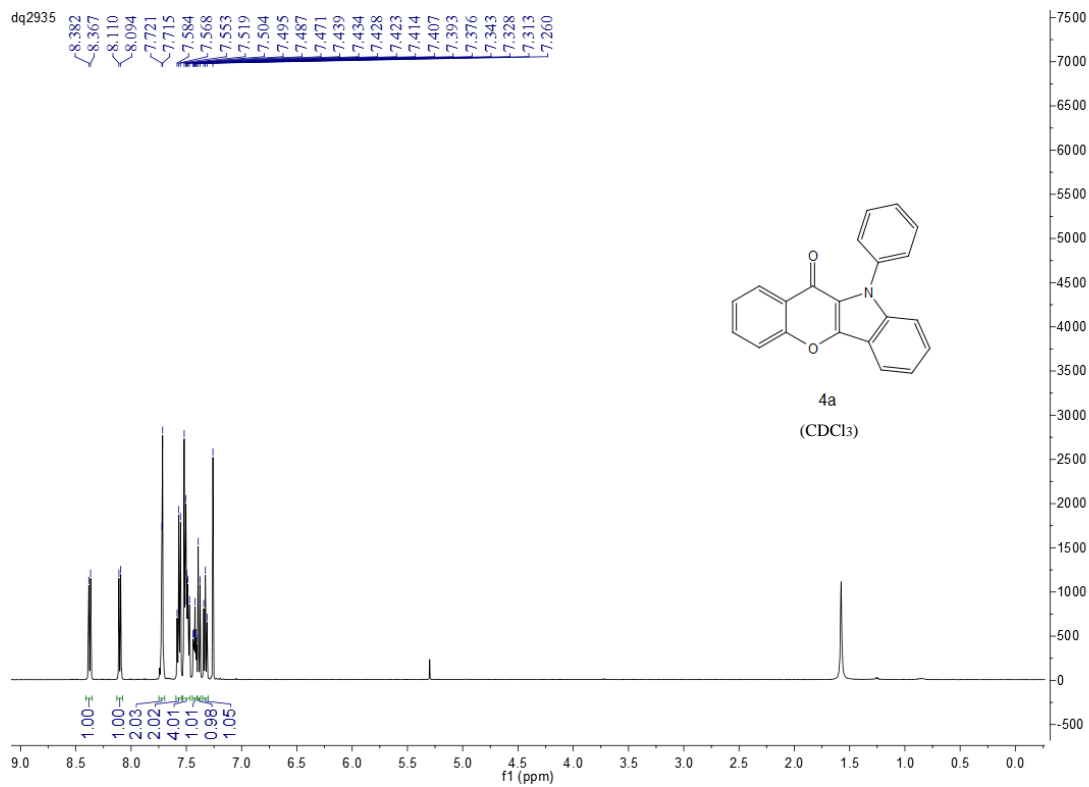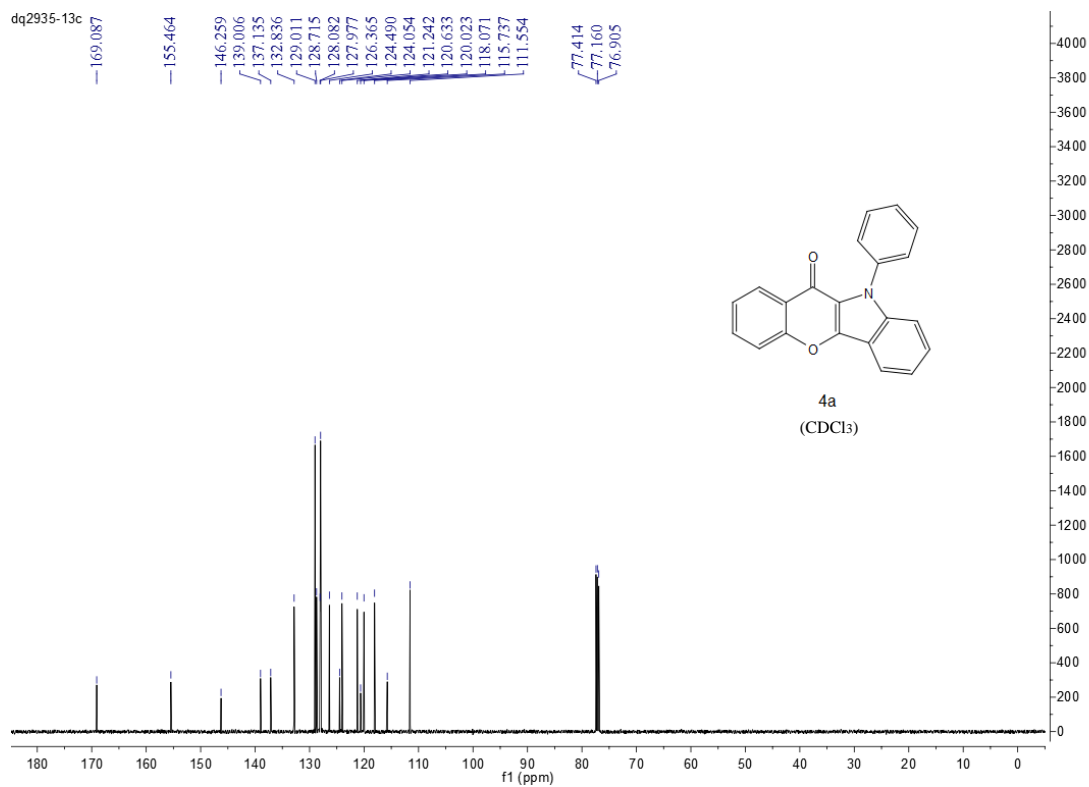

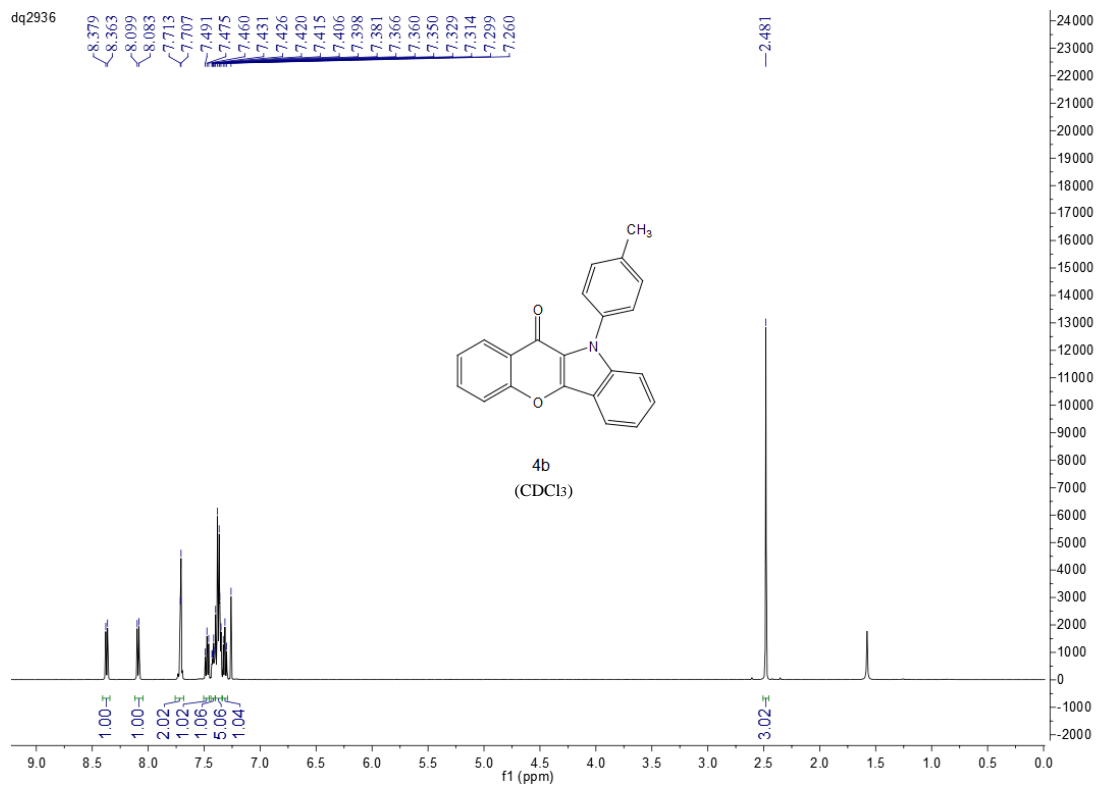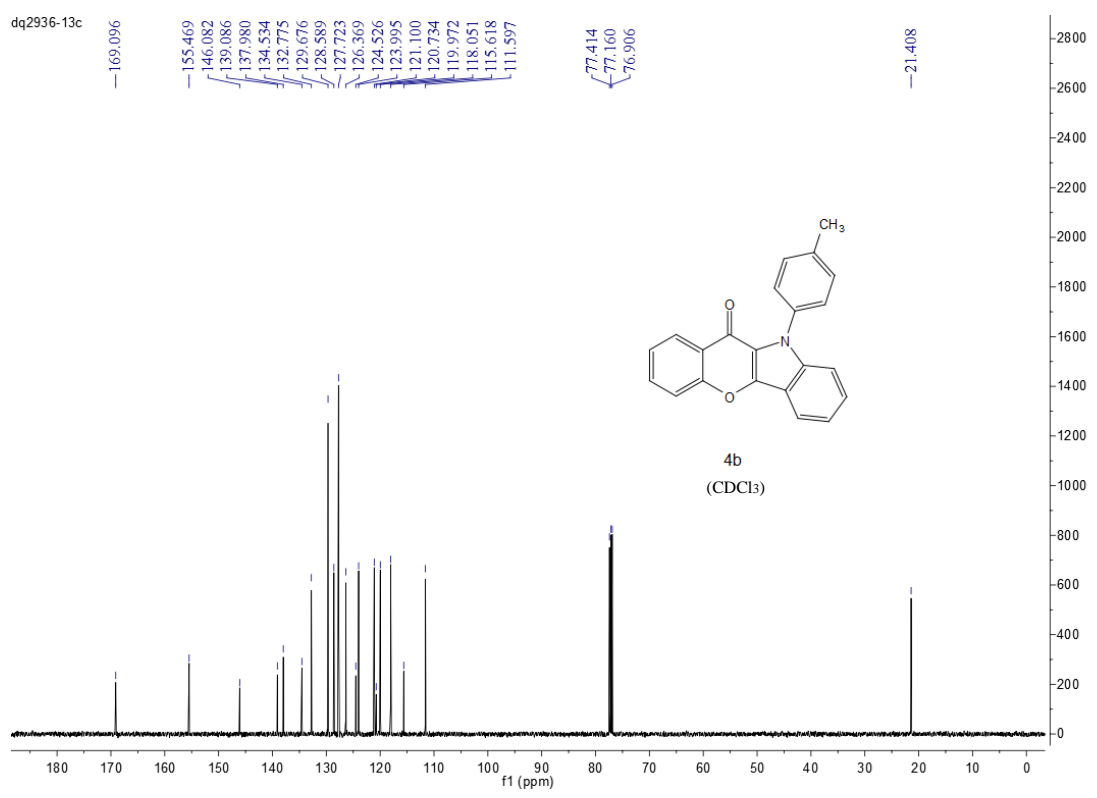

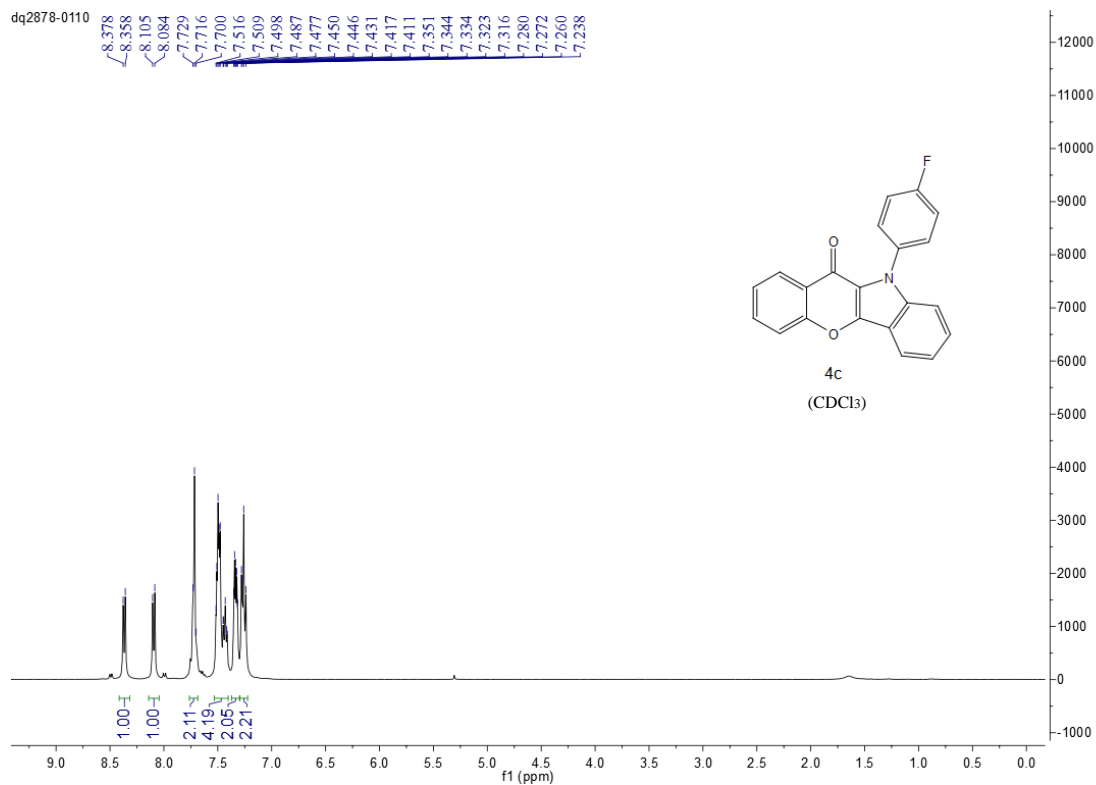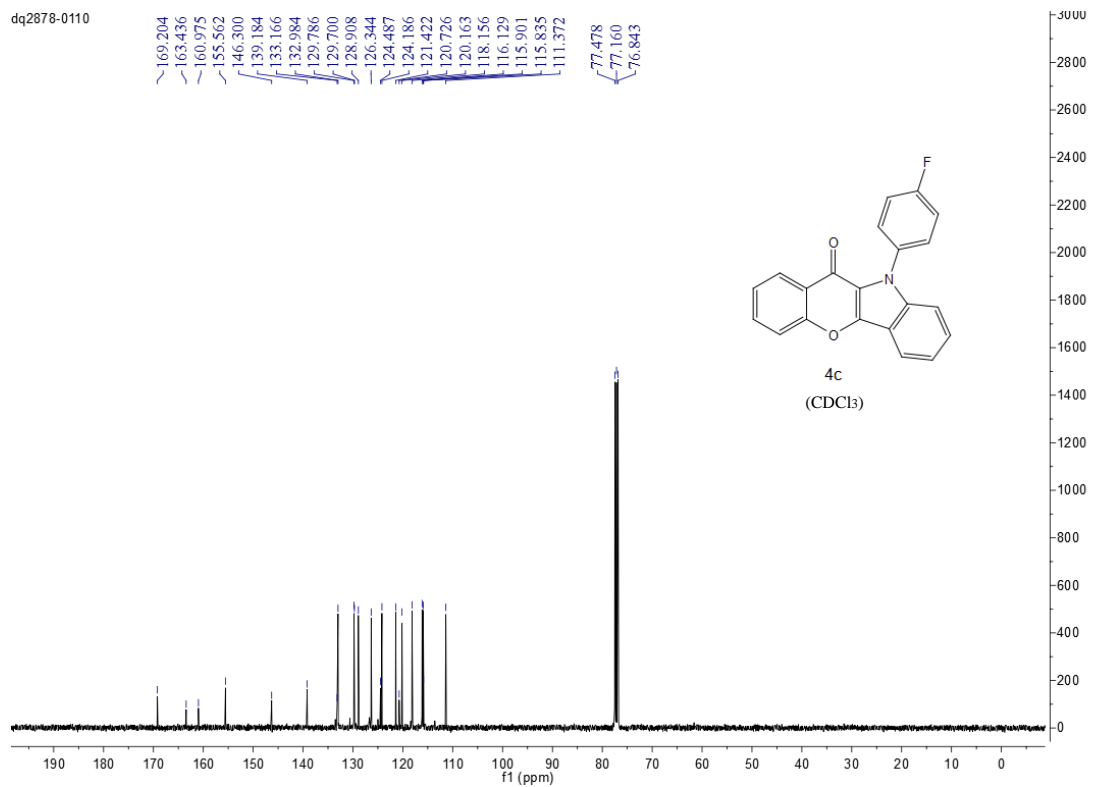

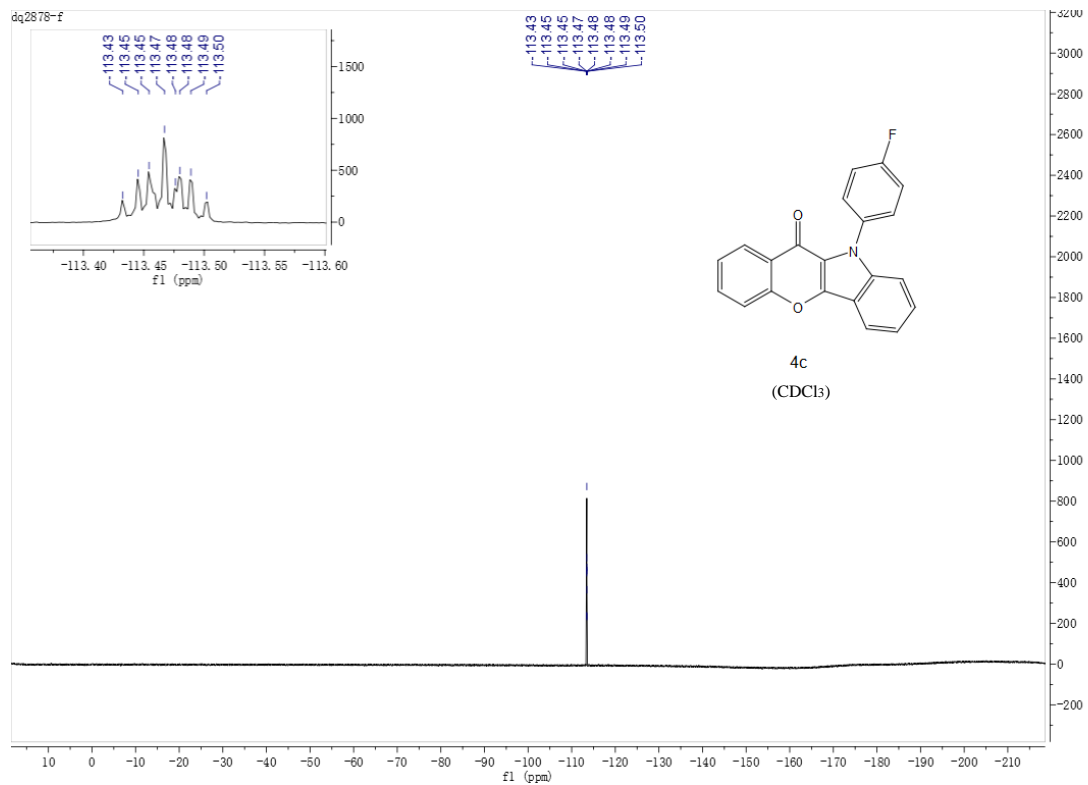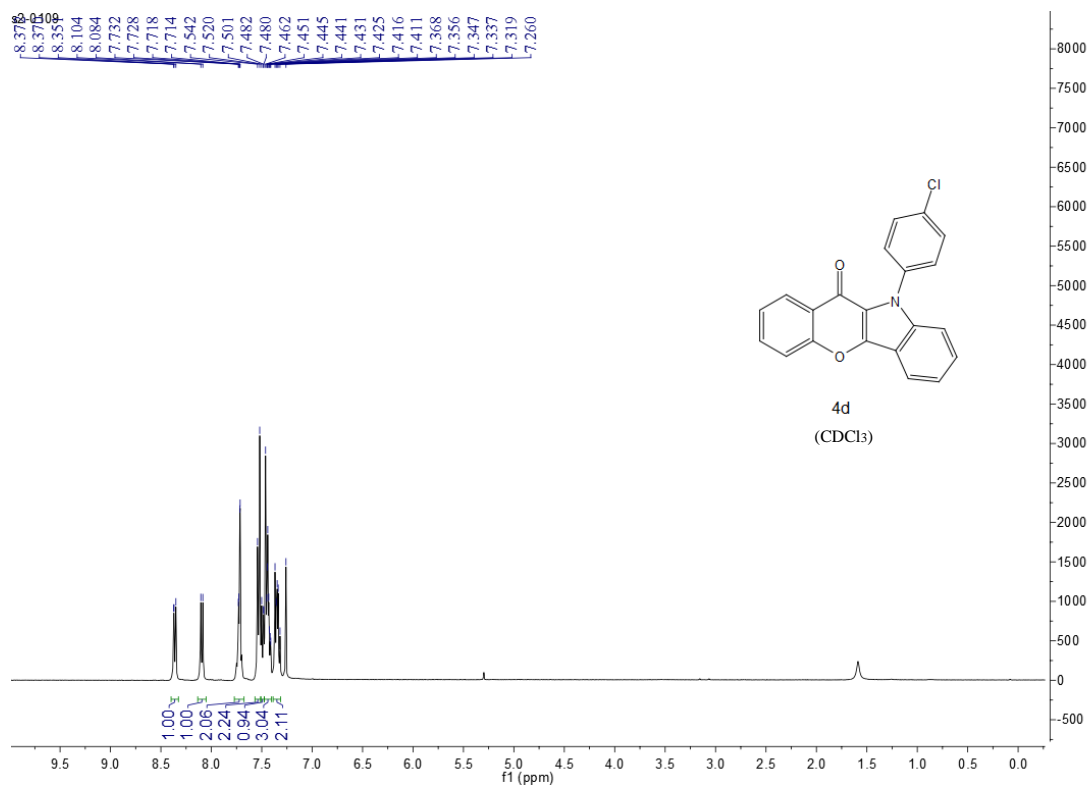

s2-0109

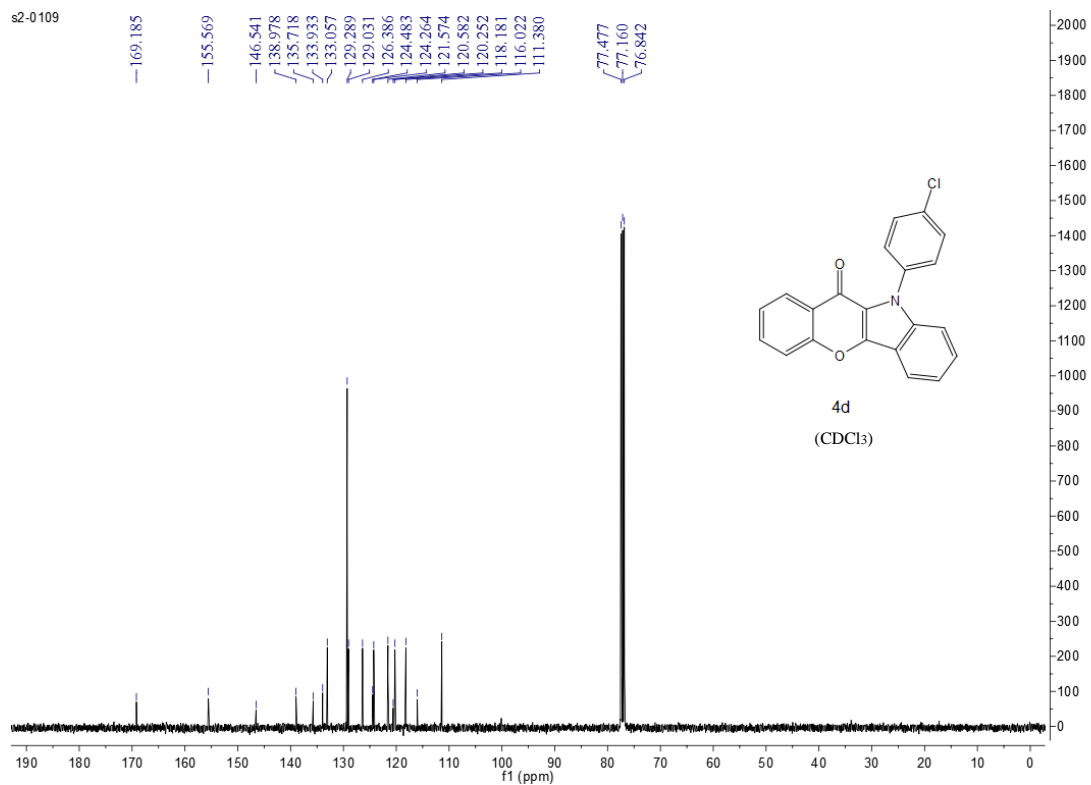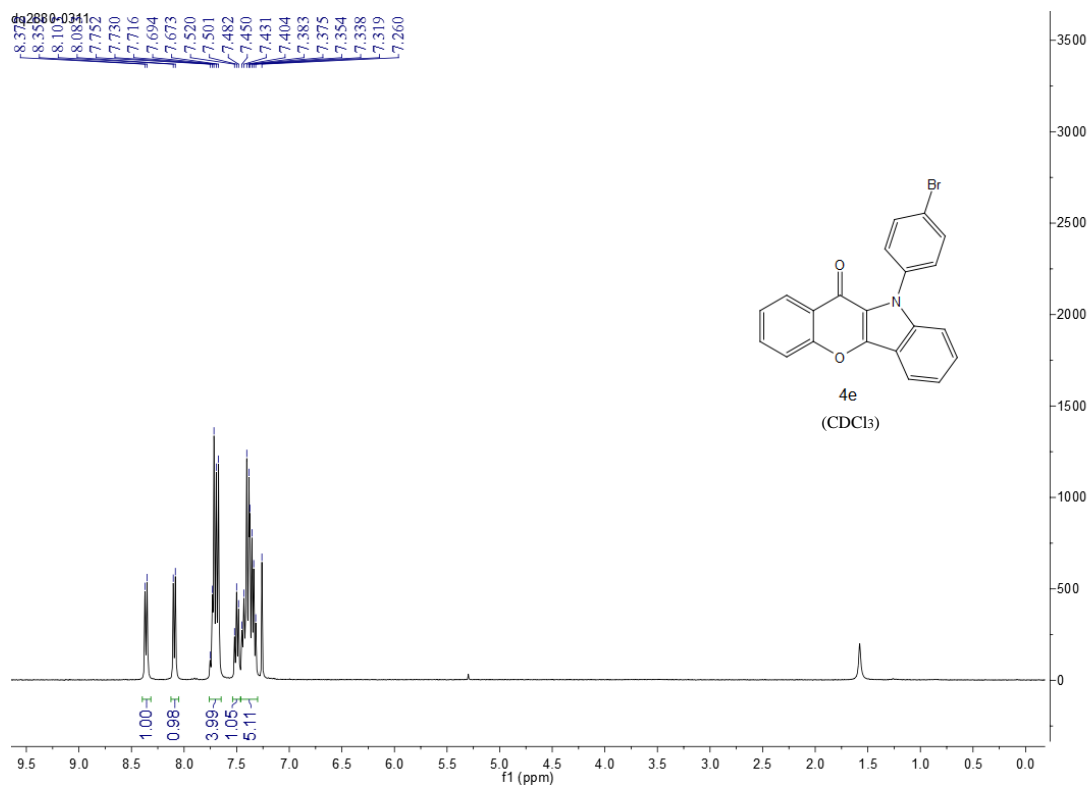

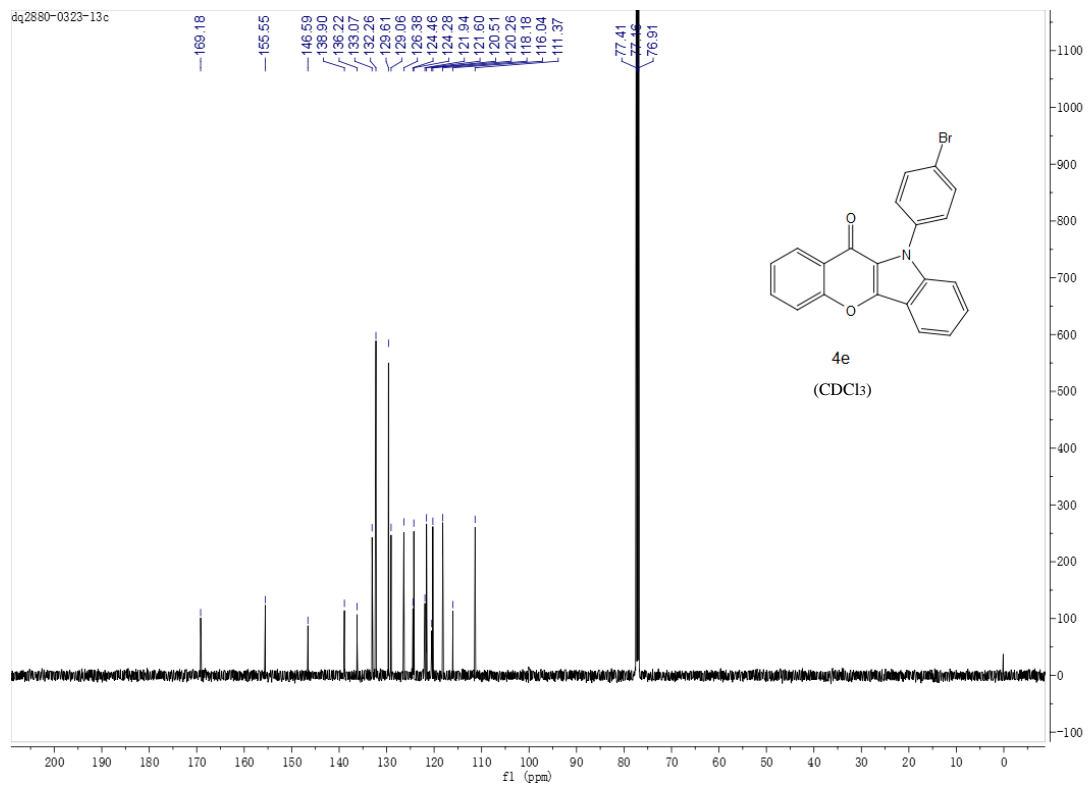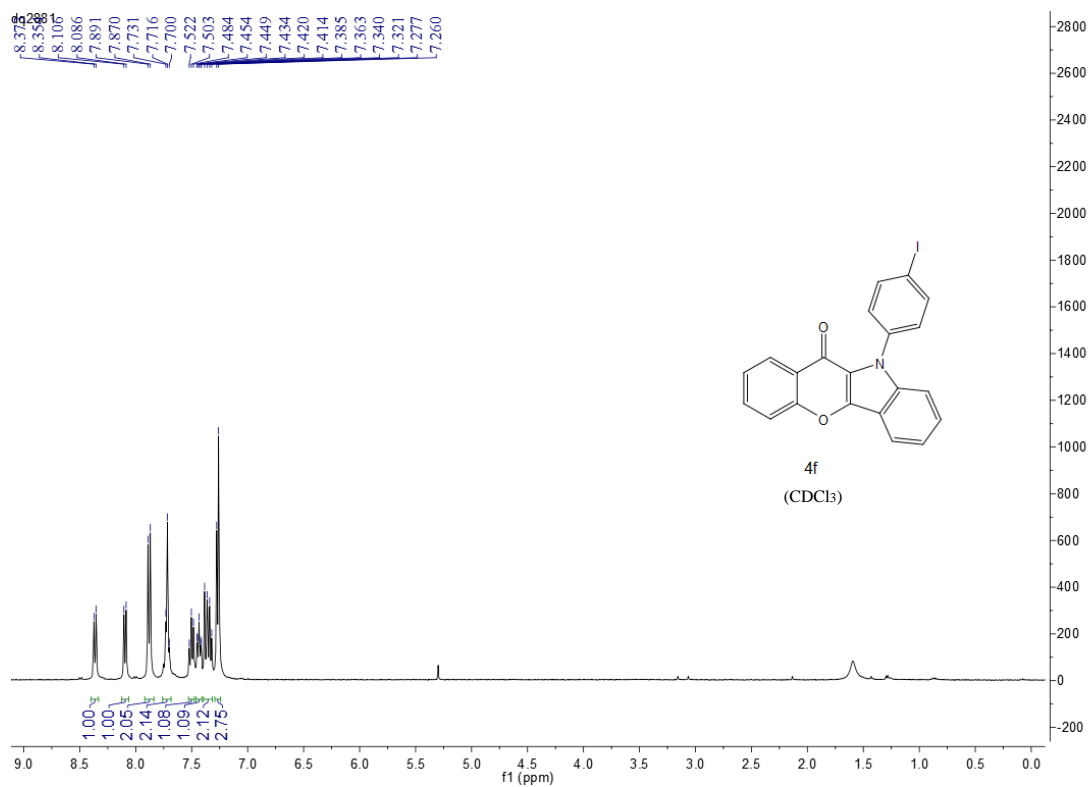



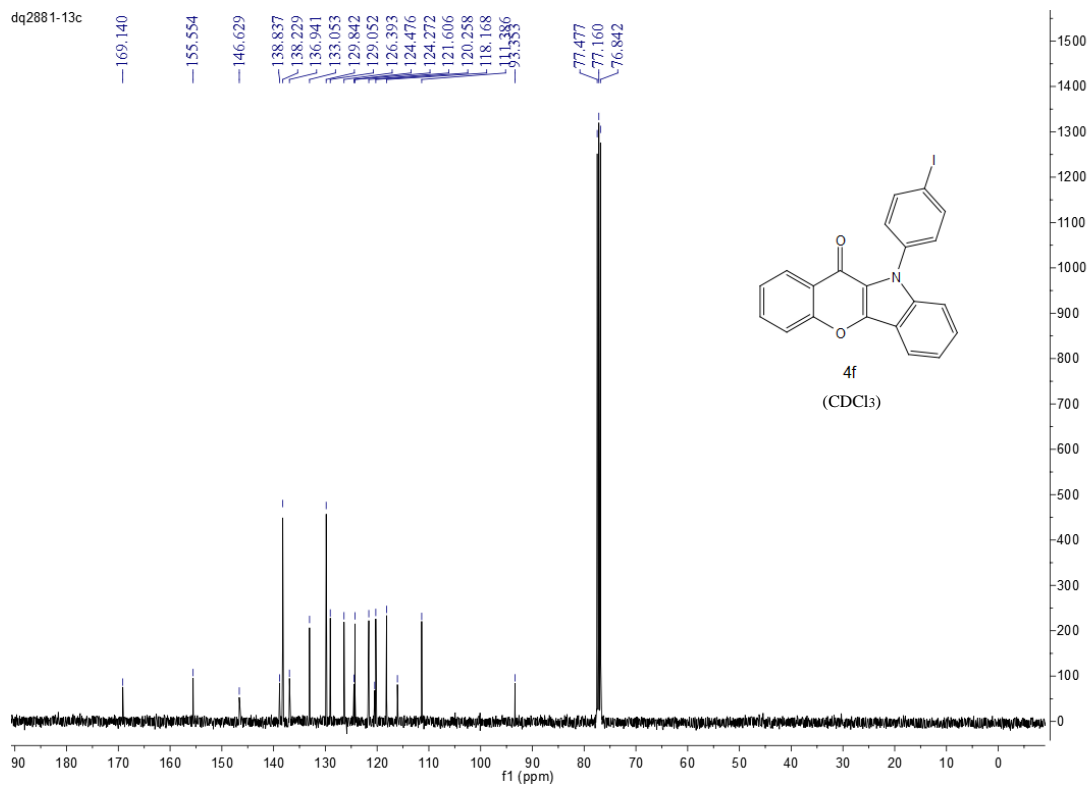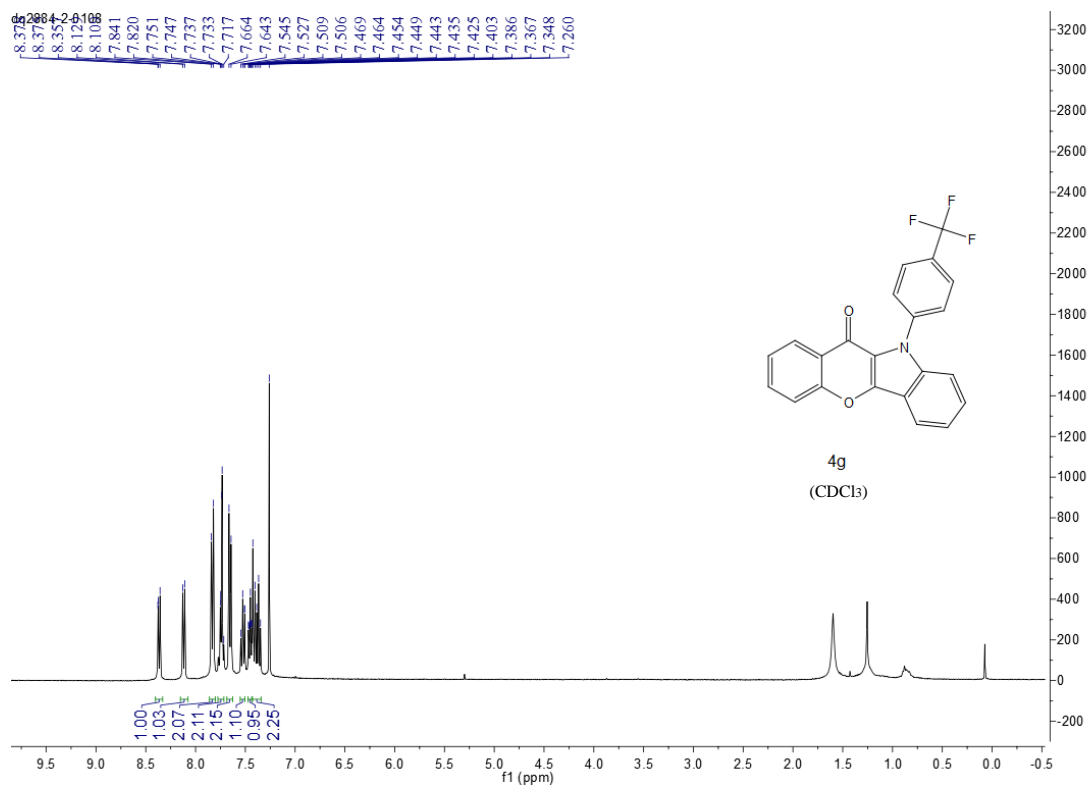

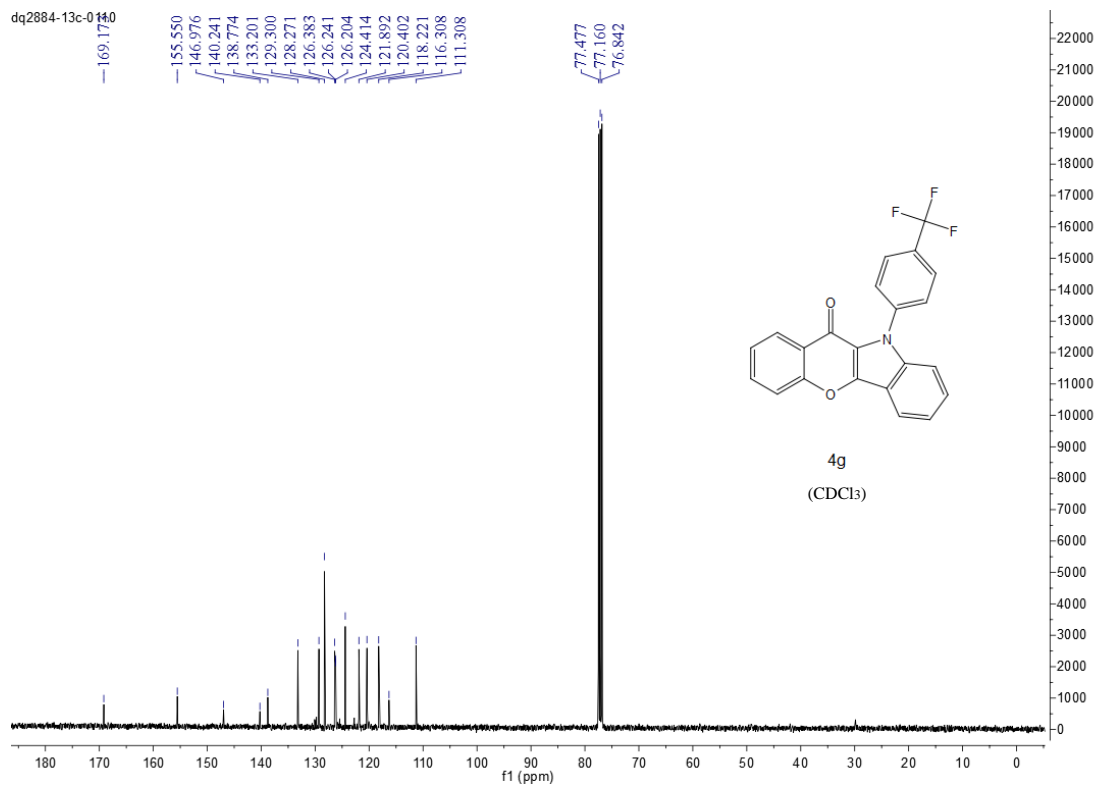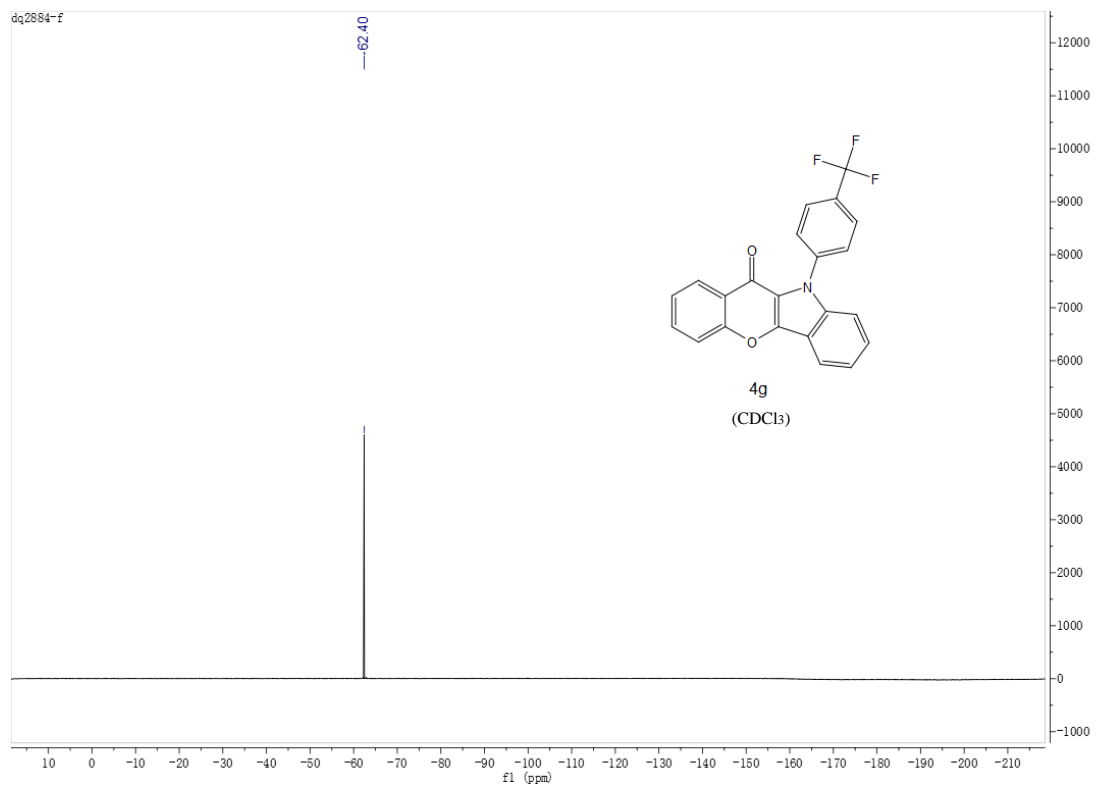

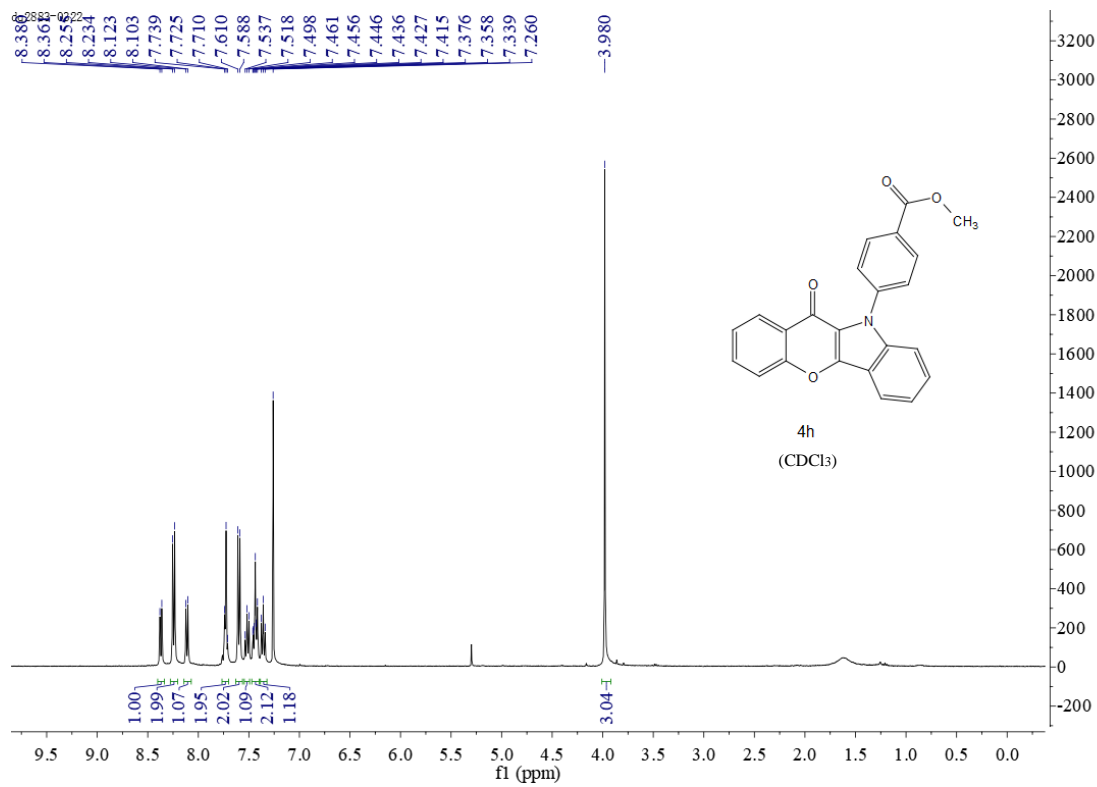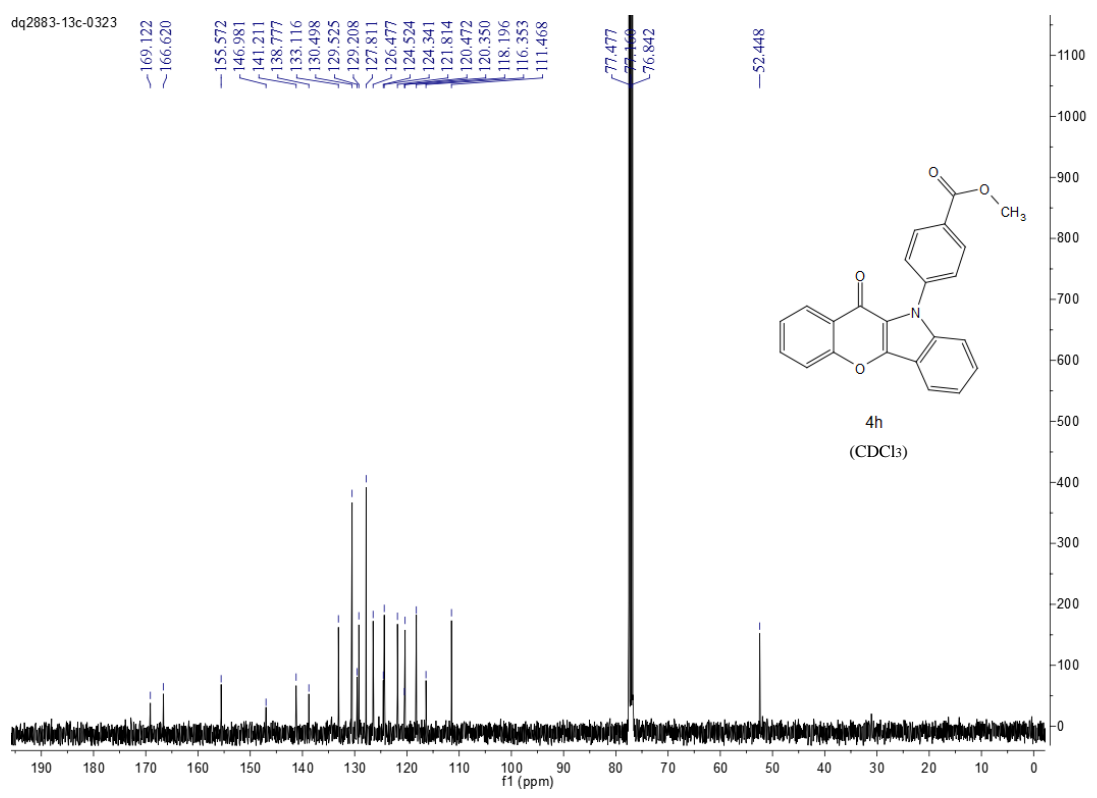

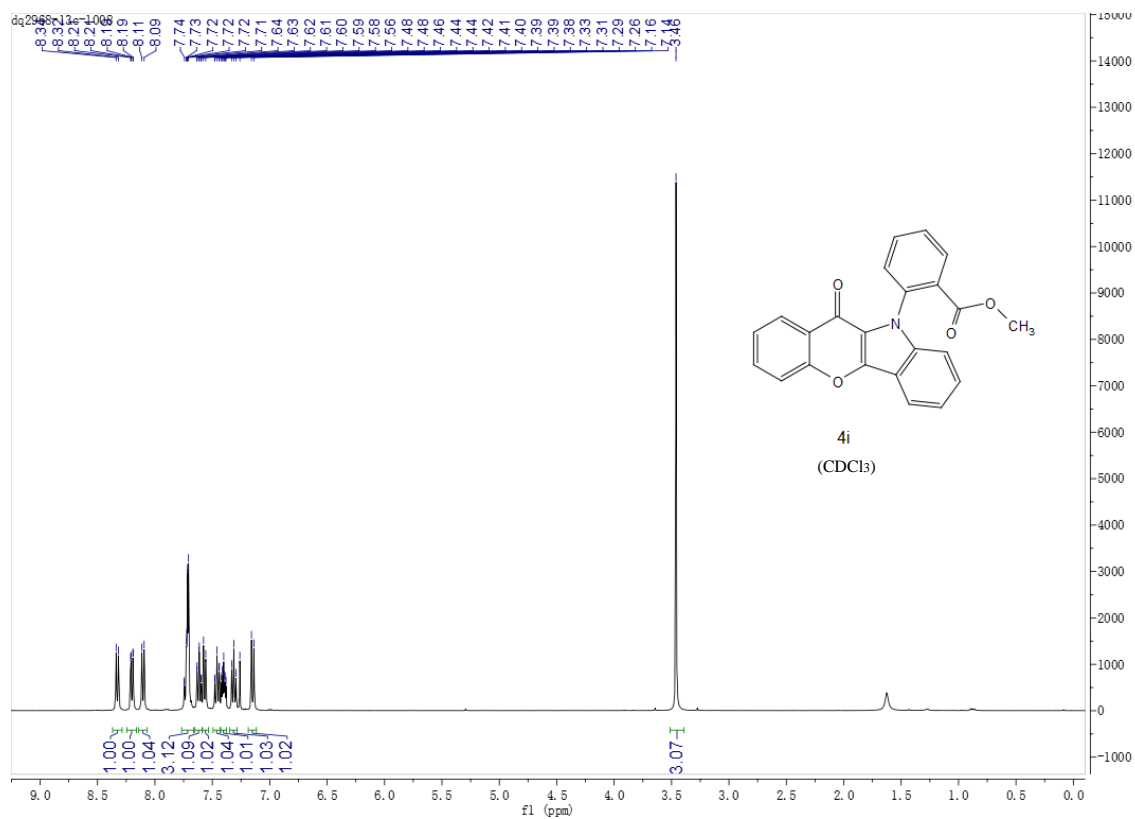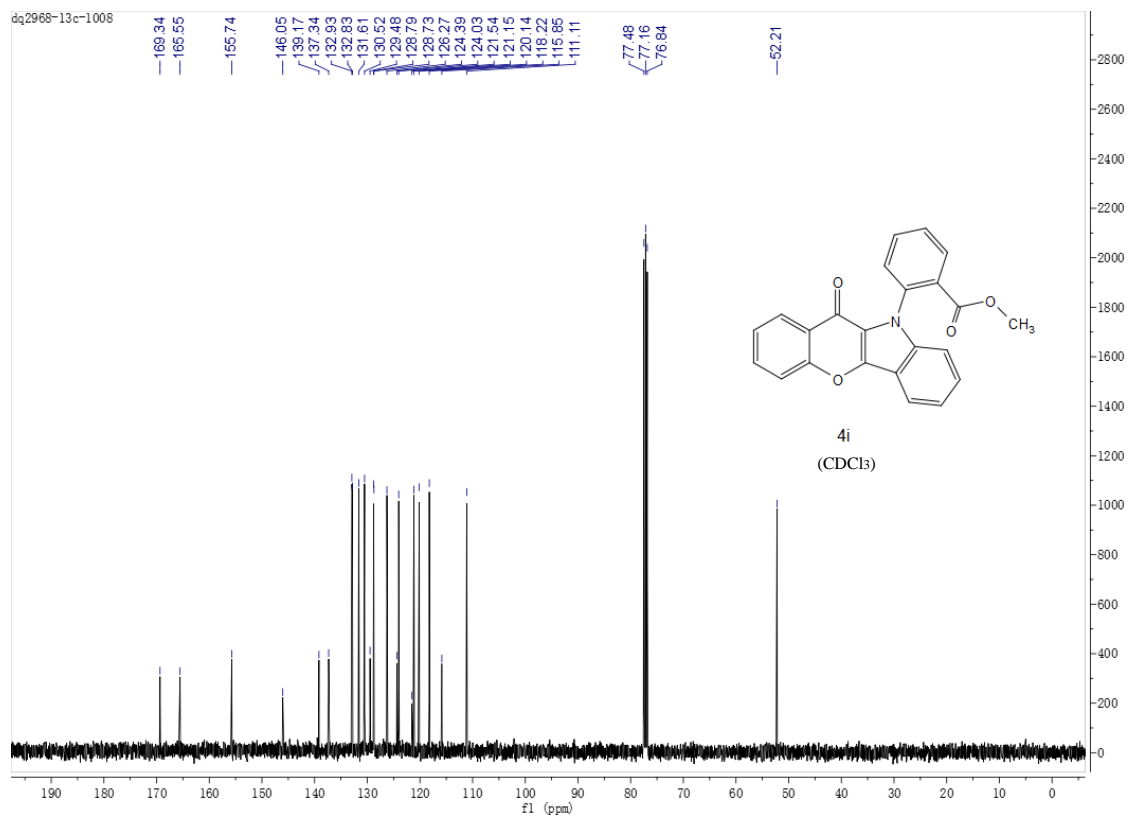

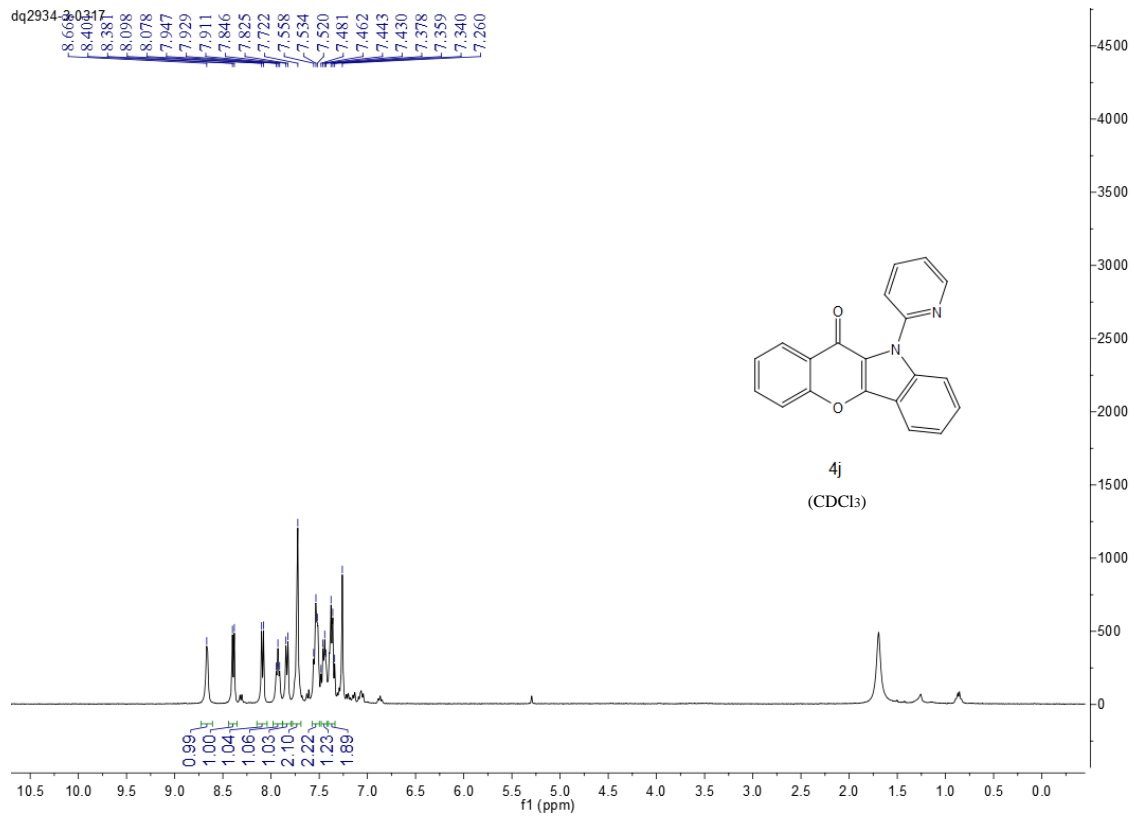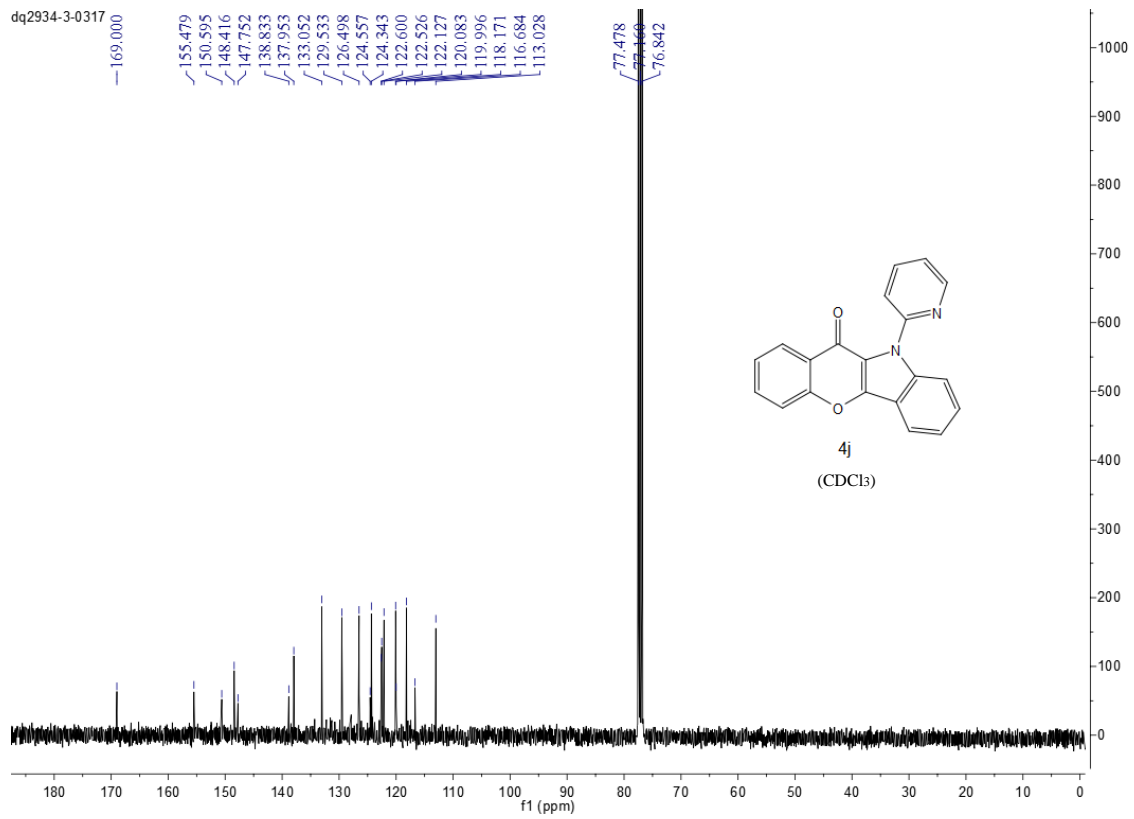

cxq48-2-1029

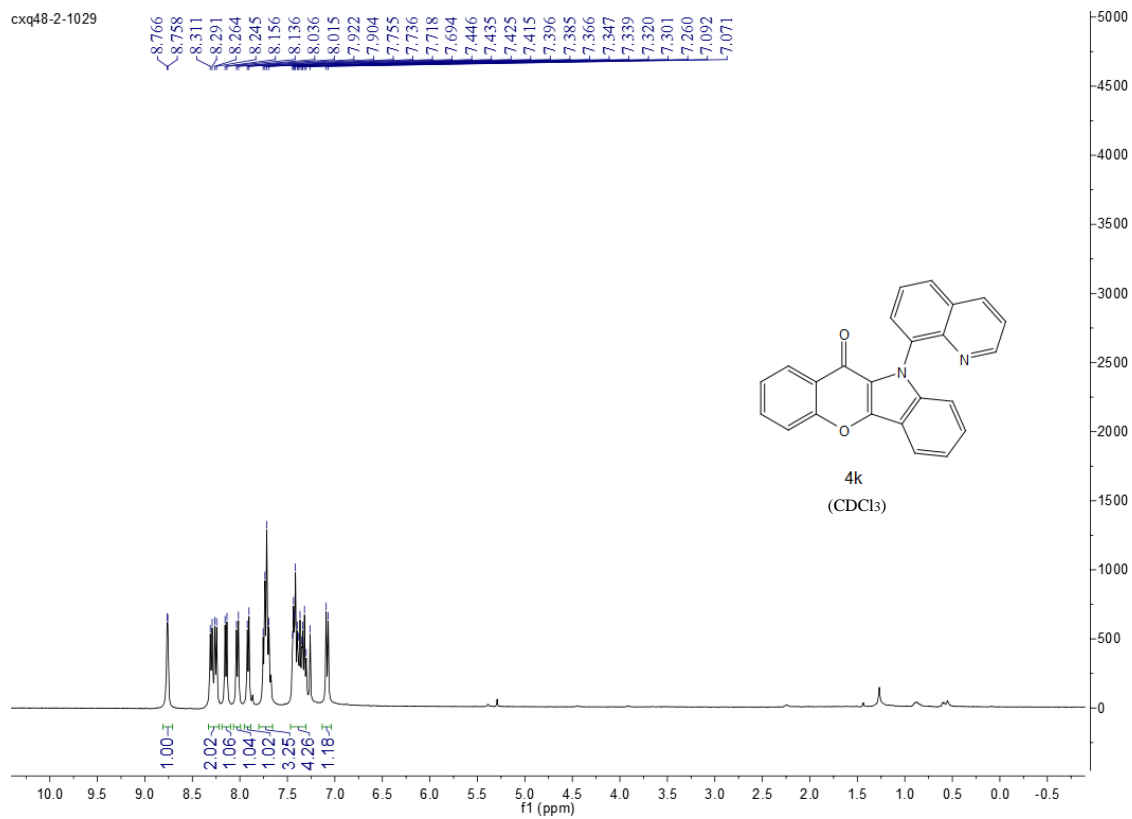

cxq48-2-13c

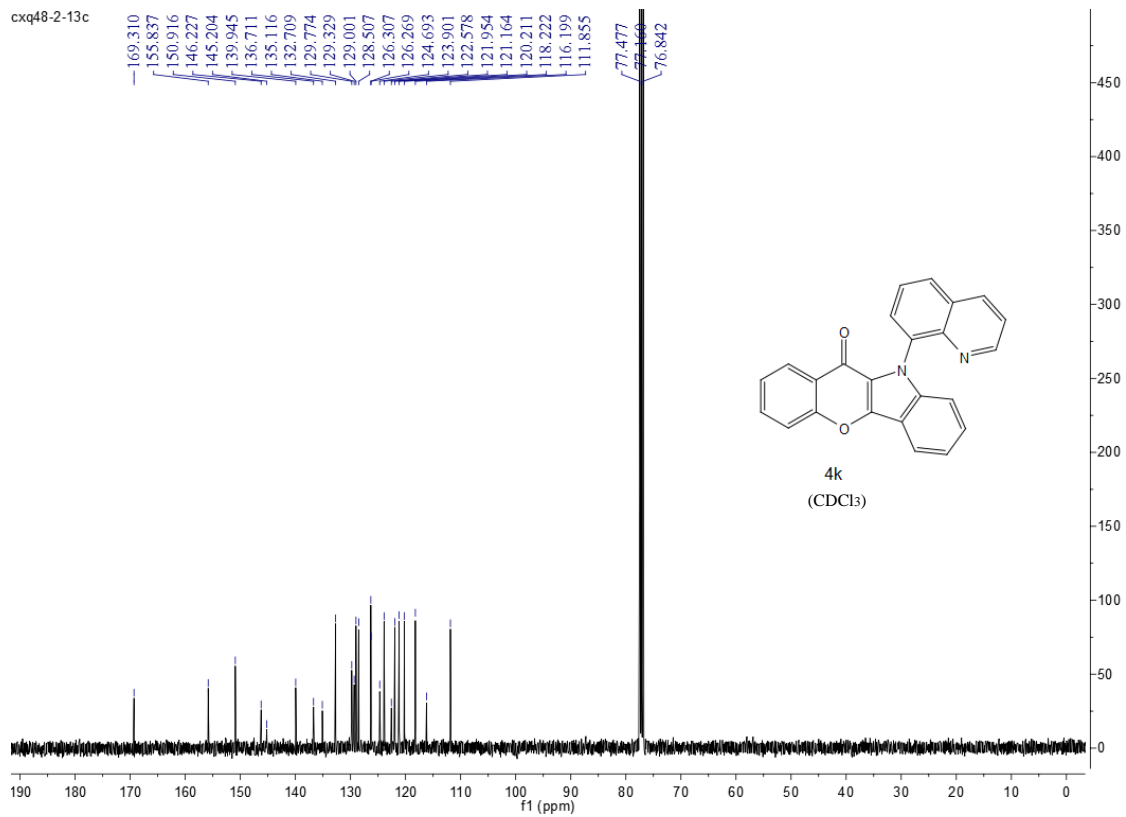

cxq43

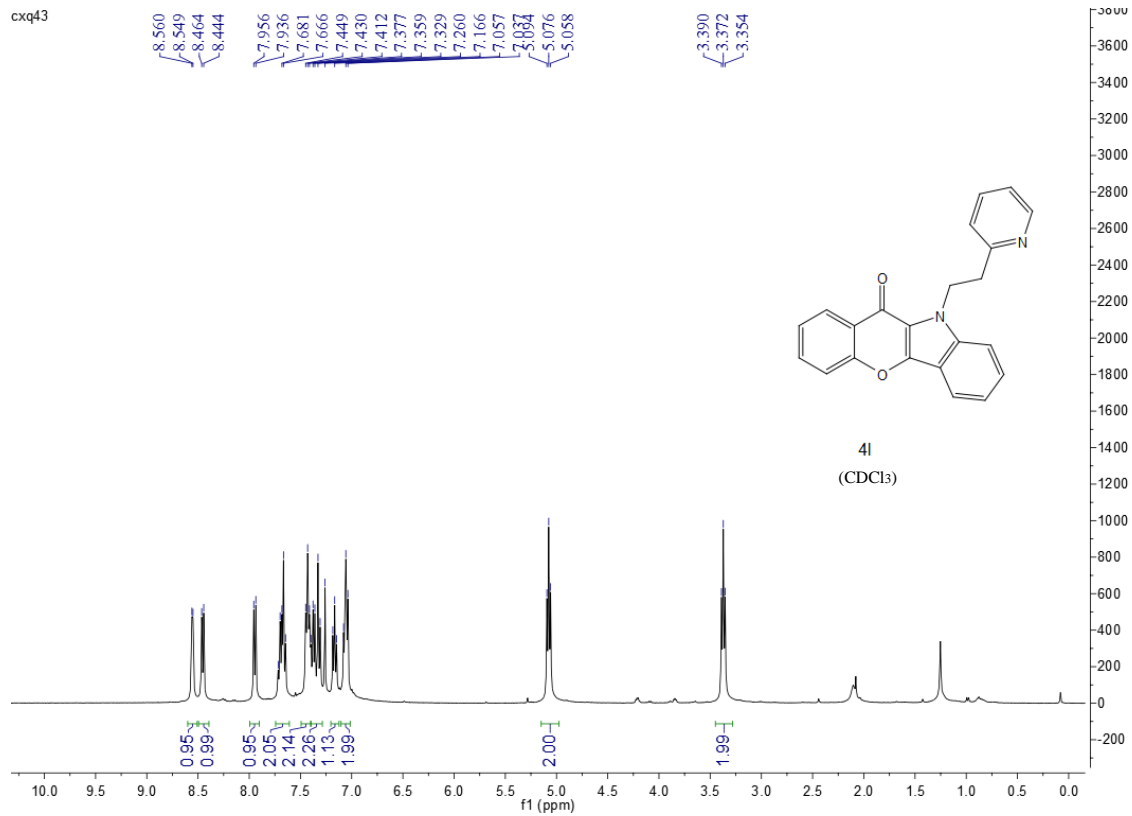

cxq43-13c

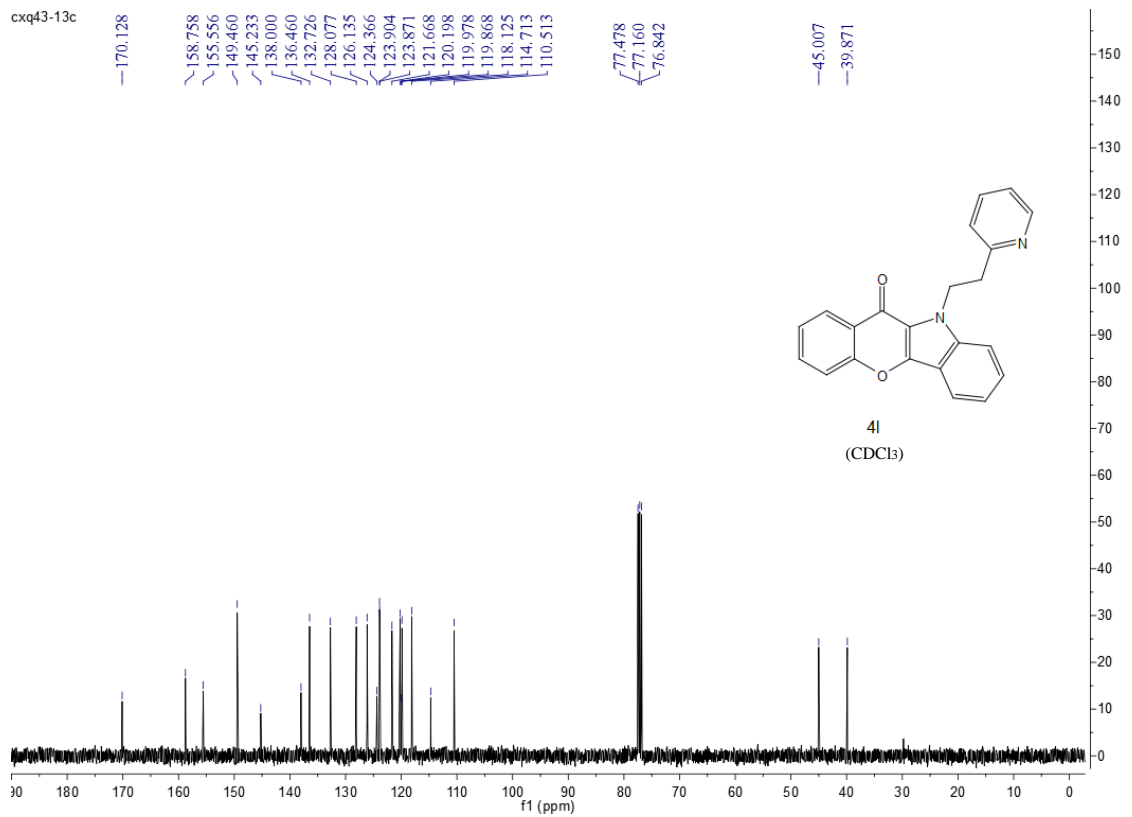





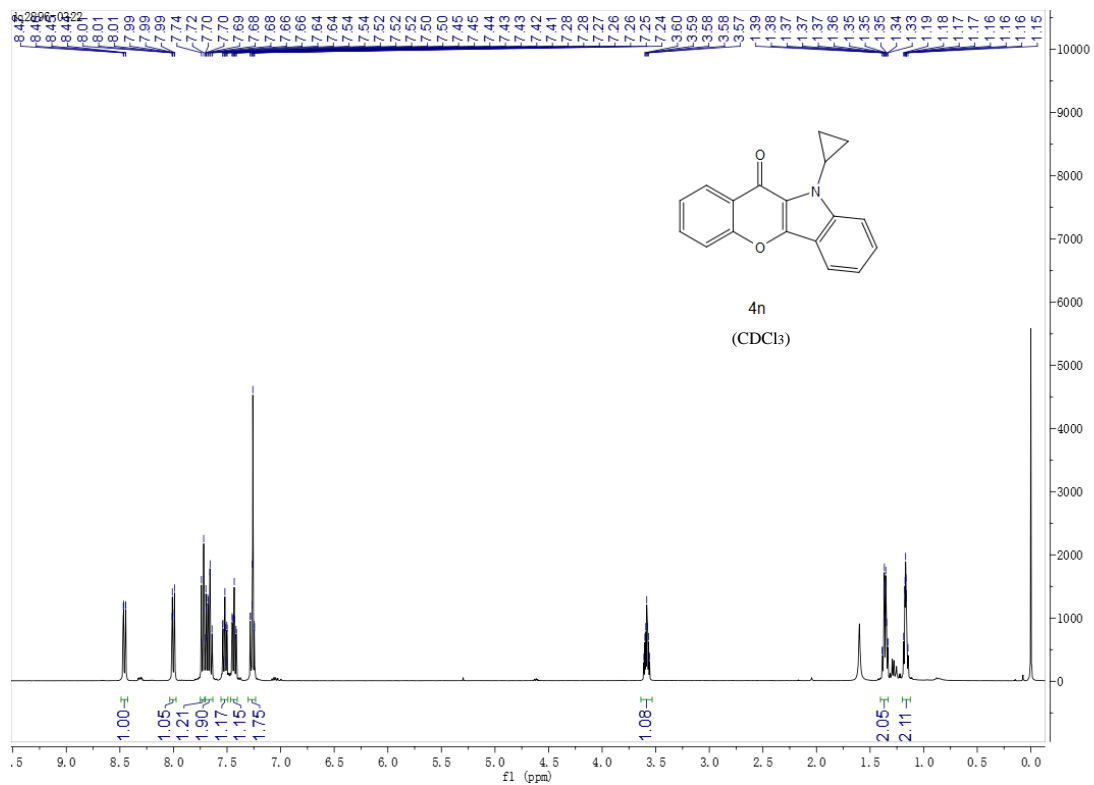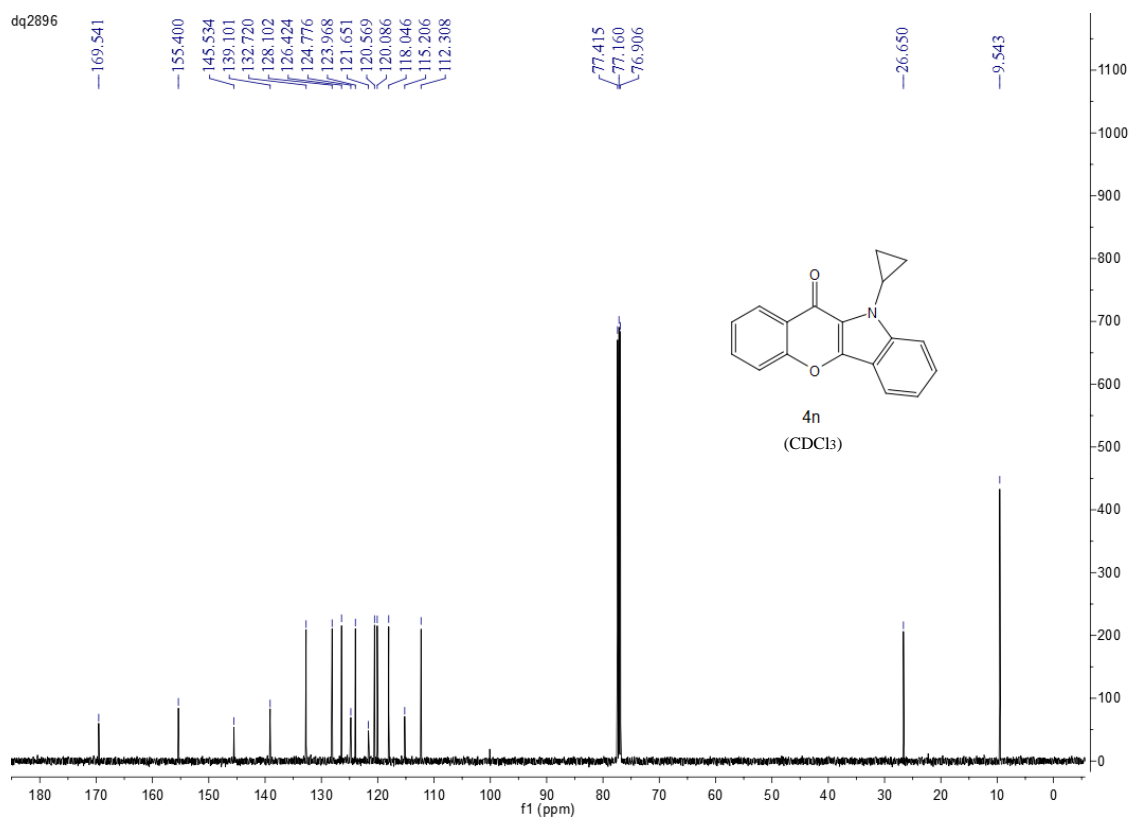

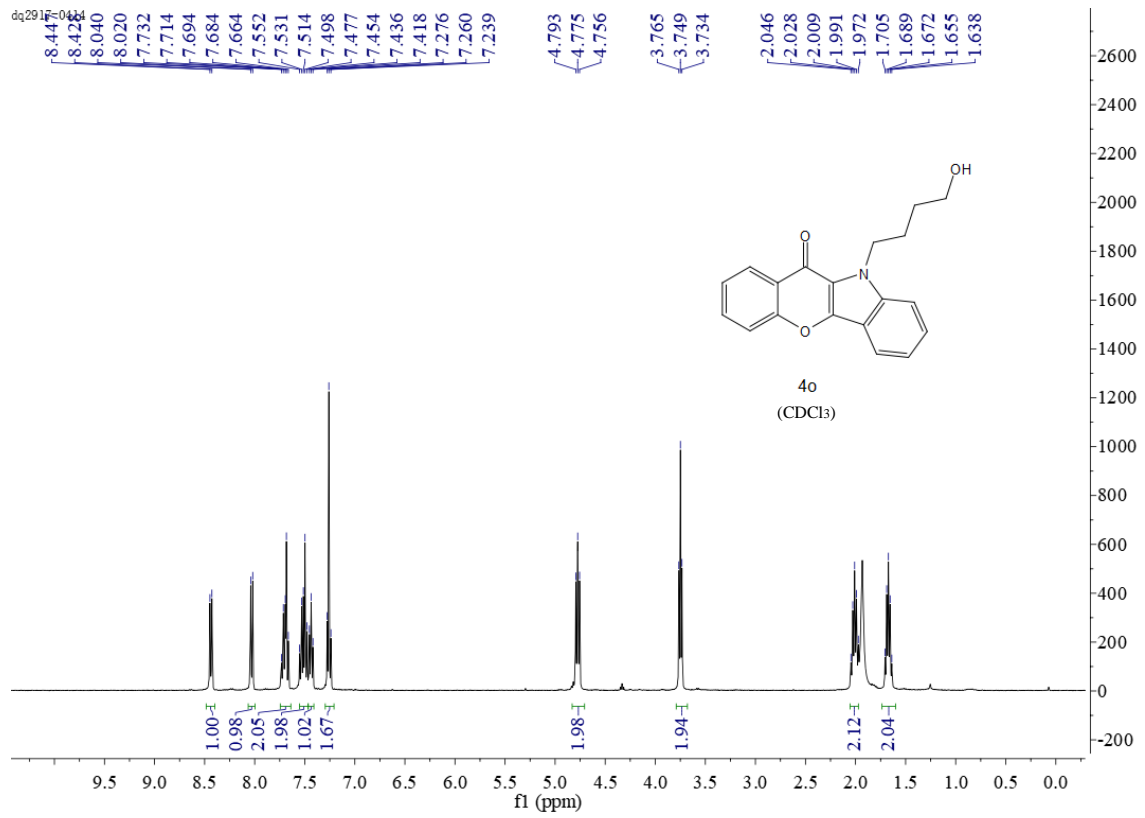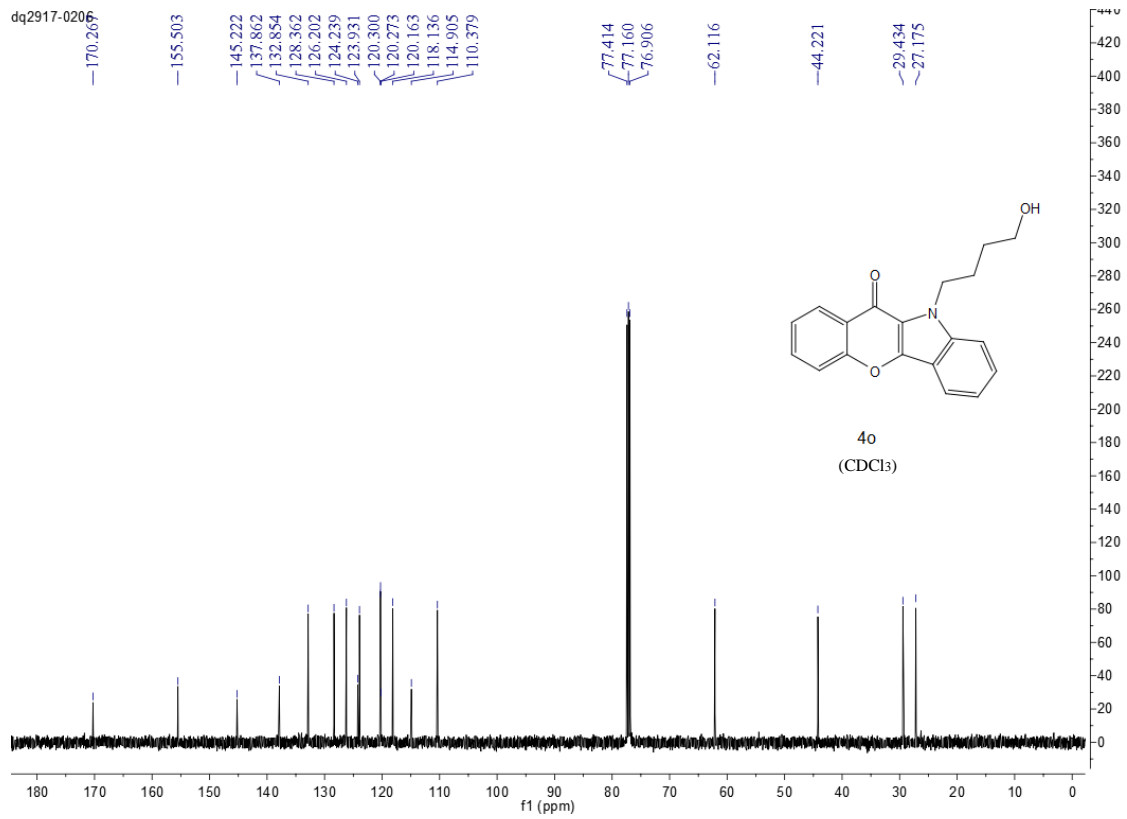

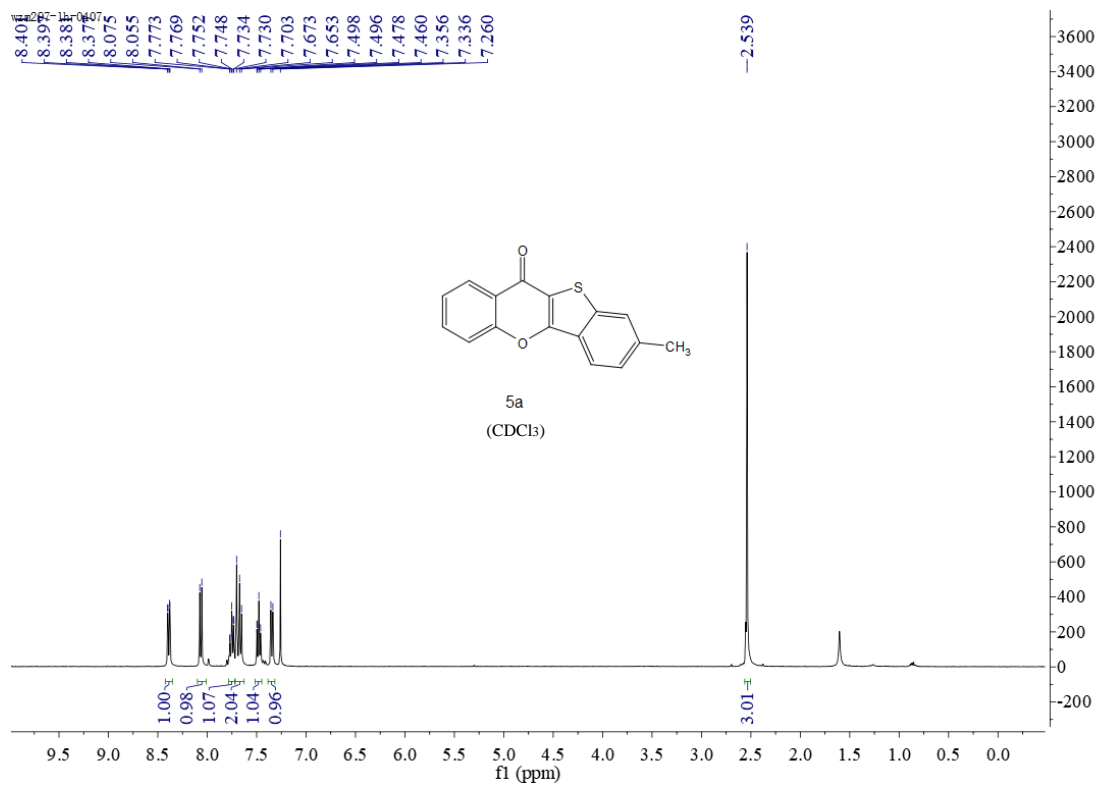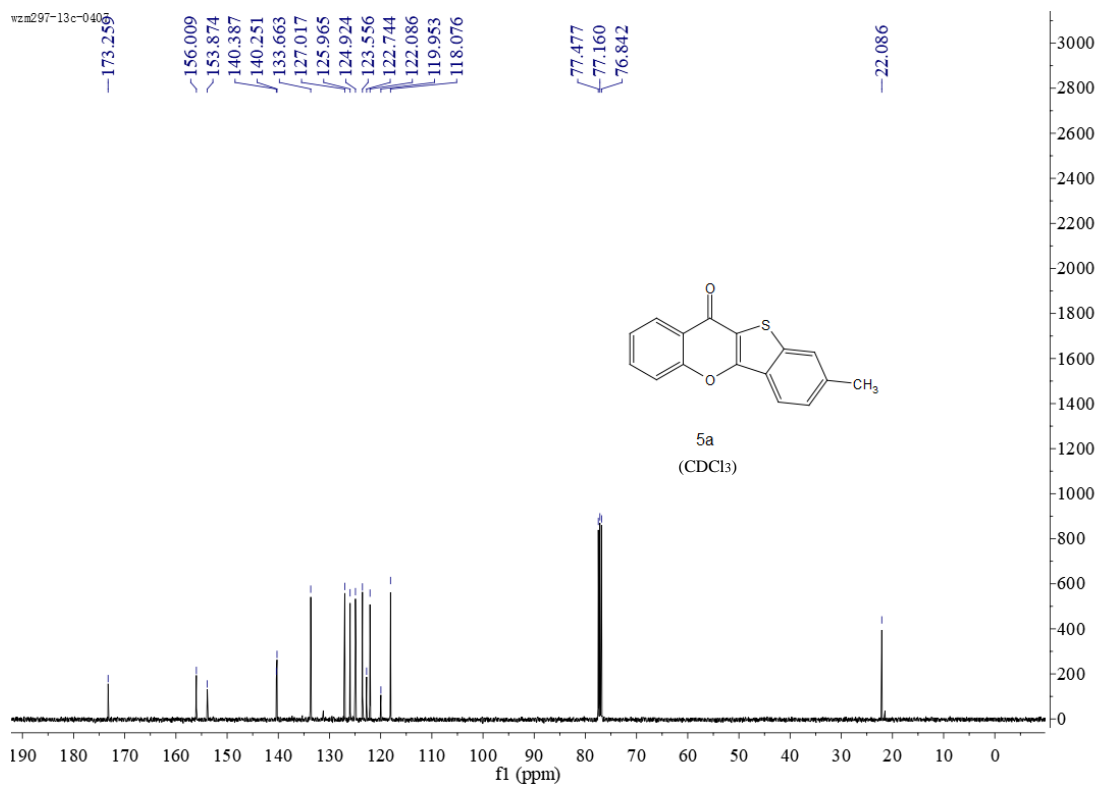

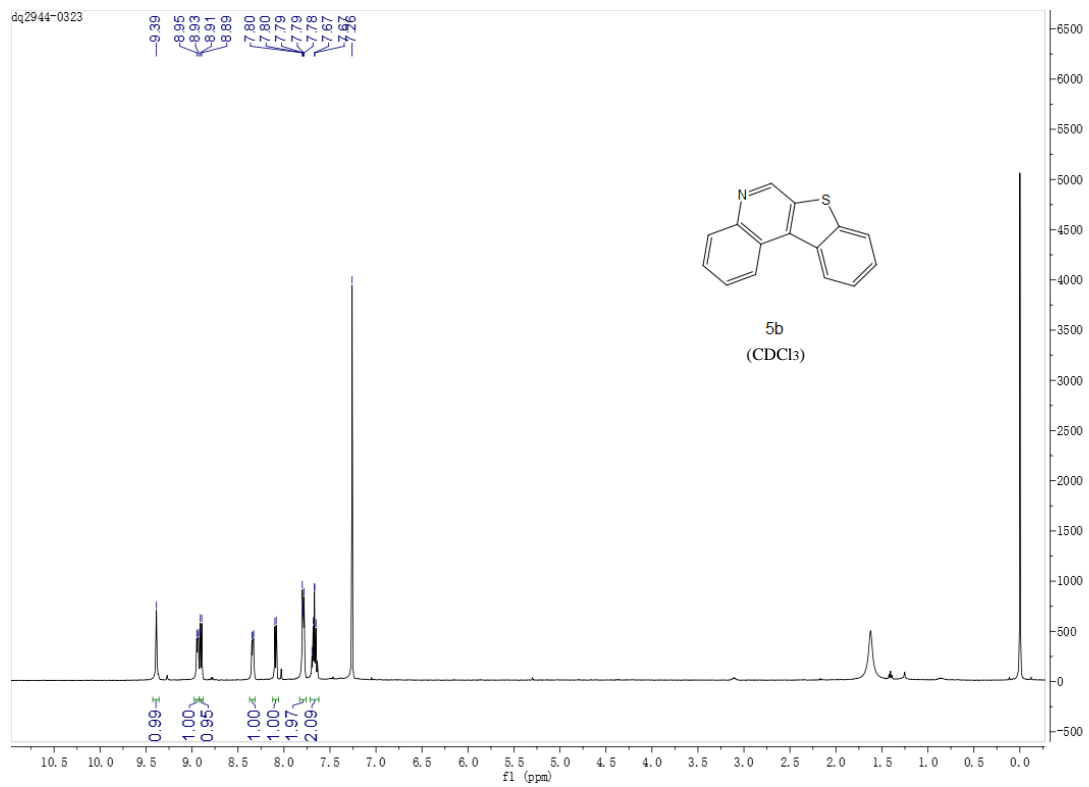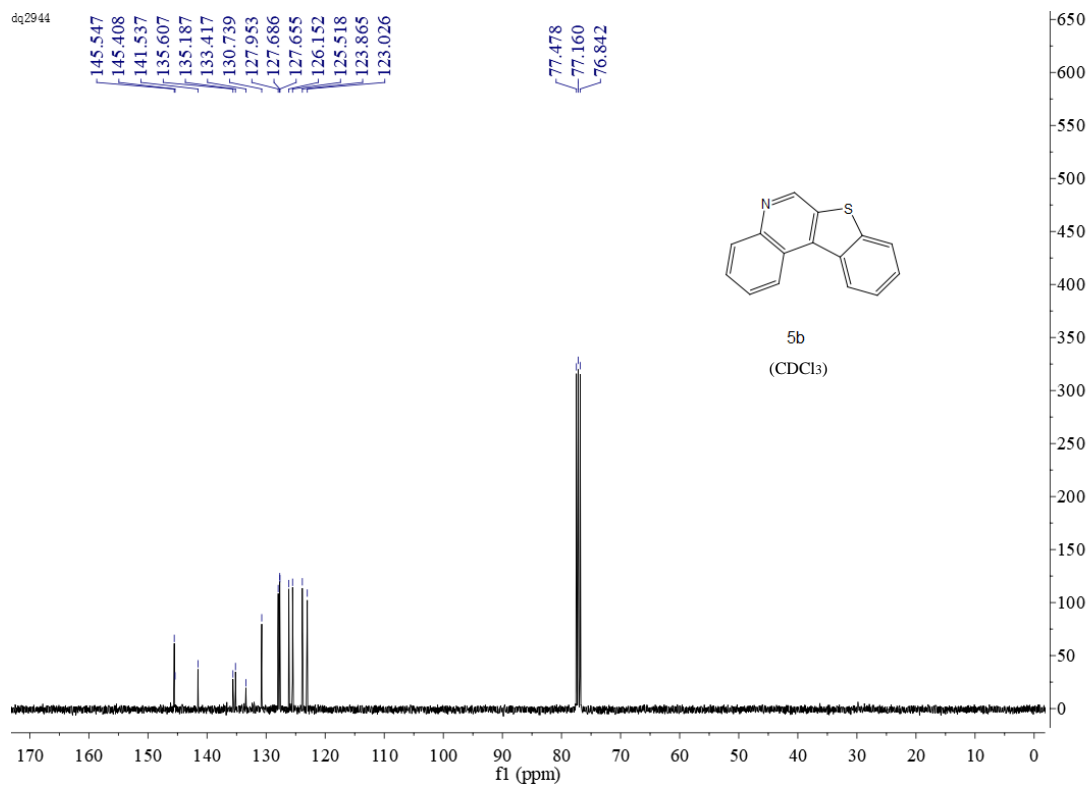

dq2945-1h-0409

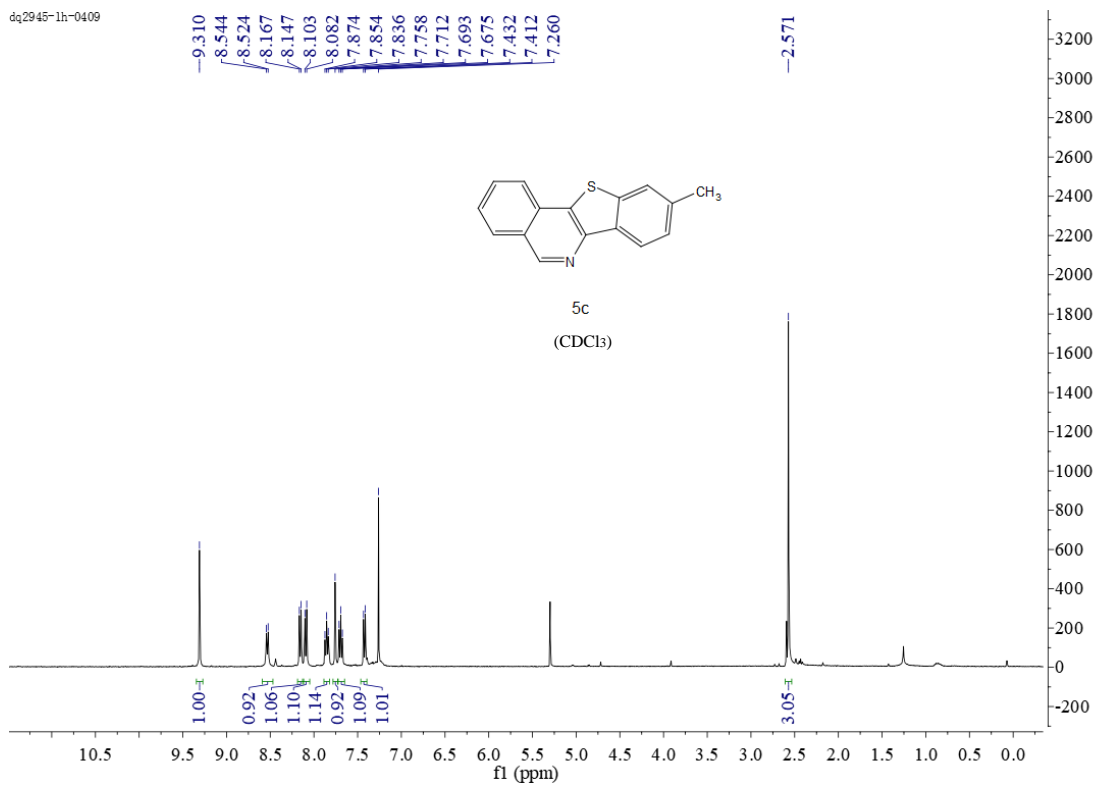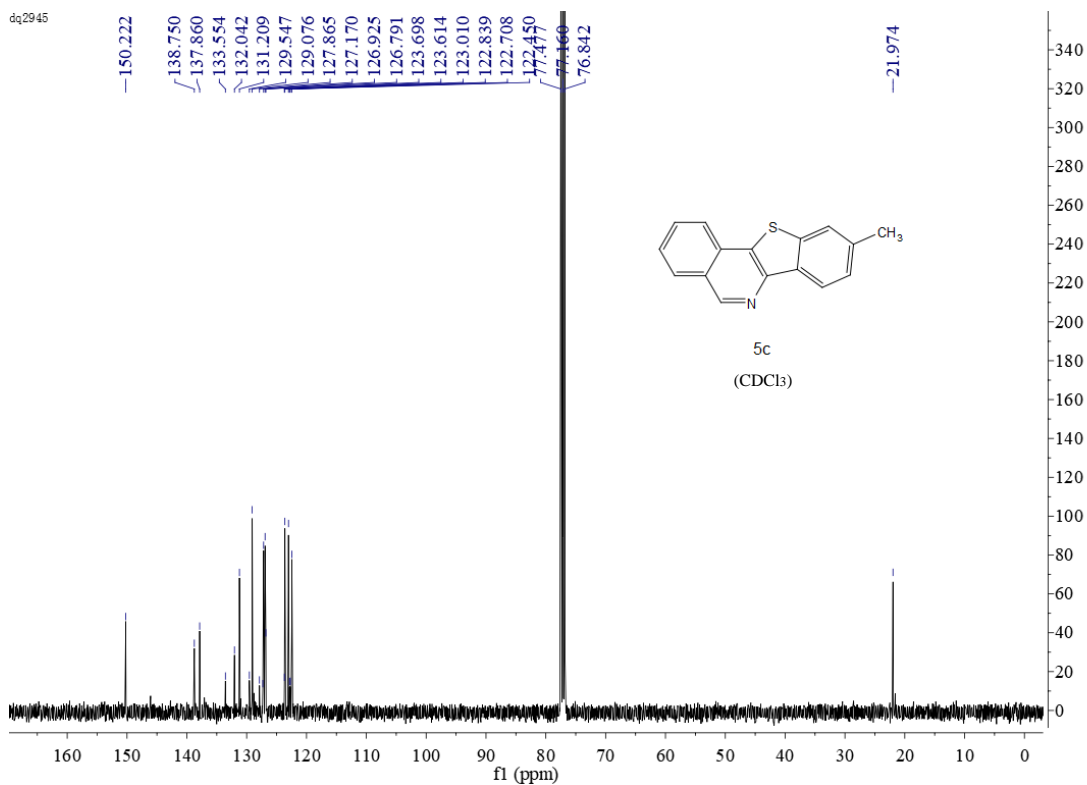

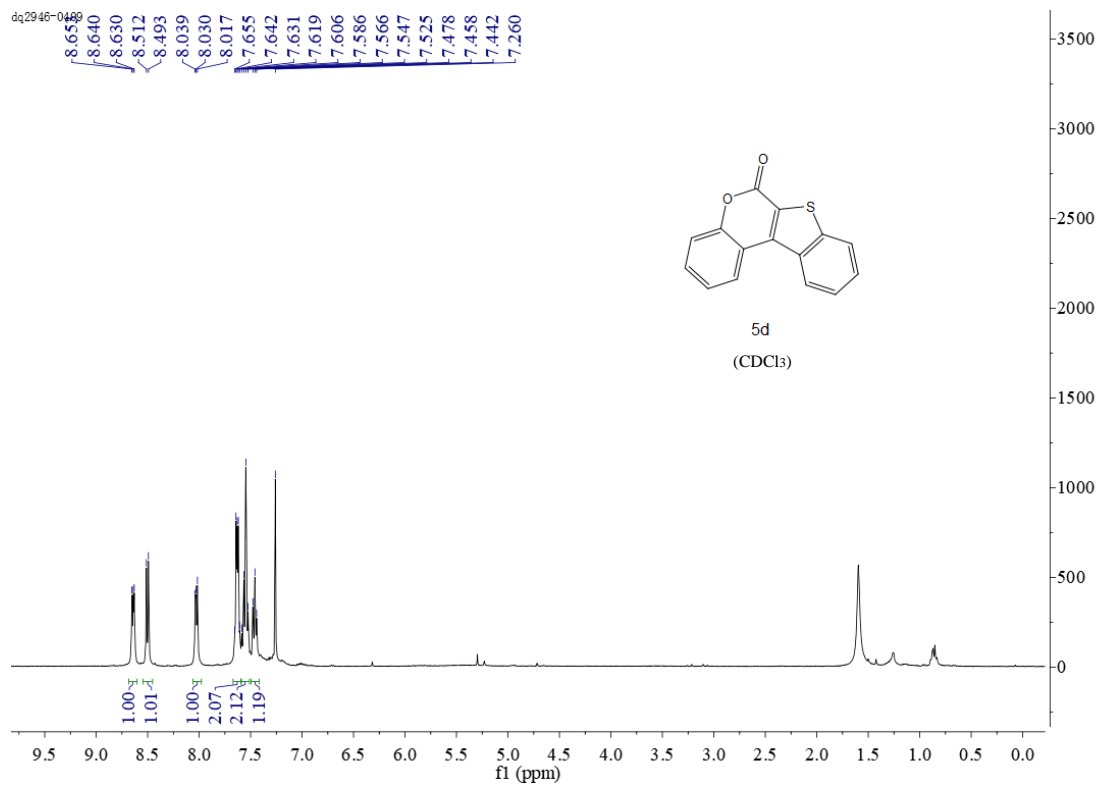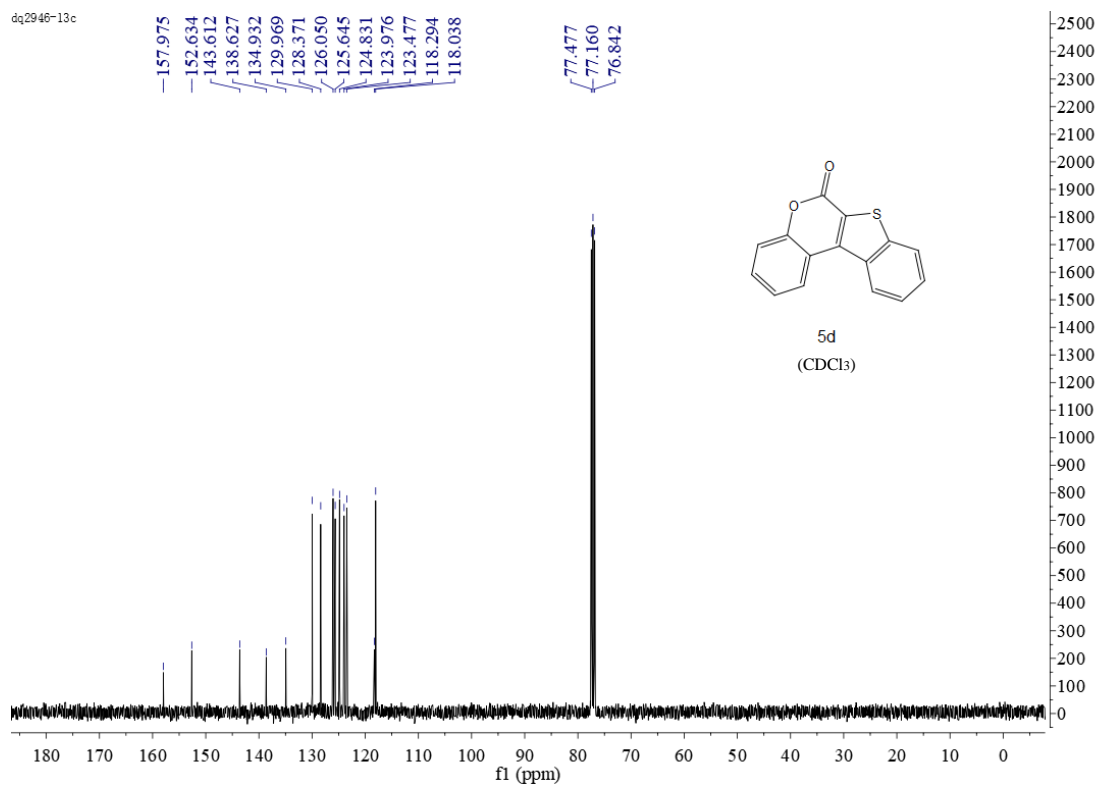

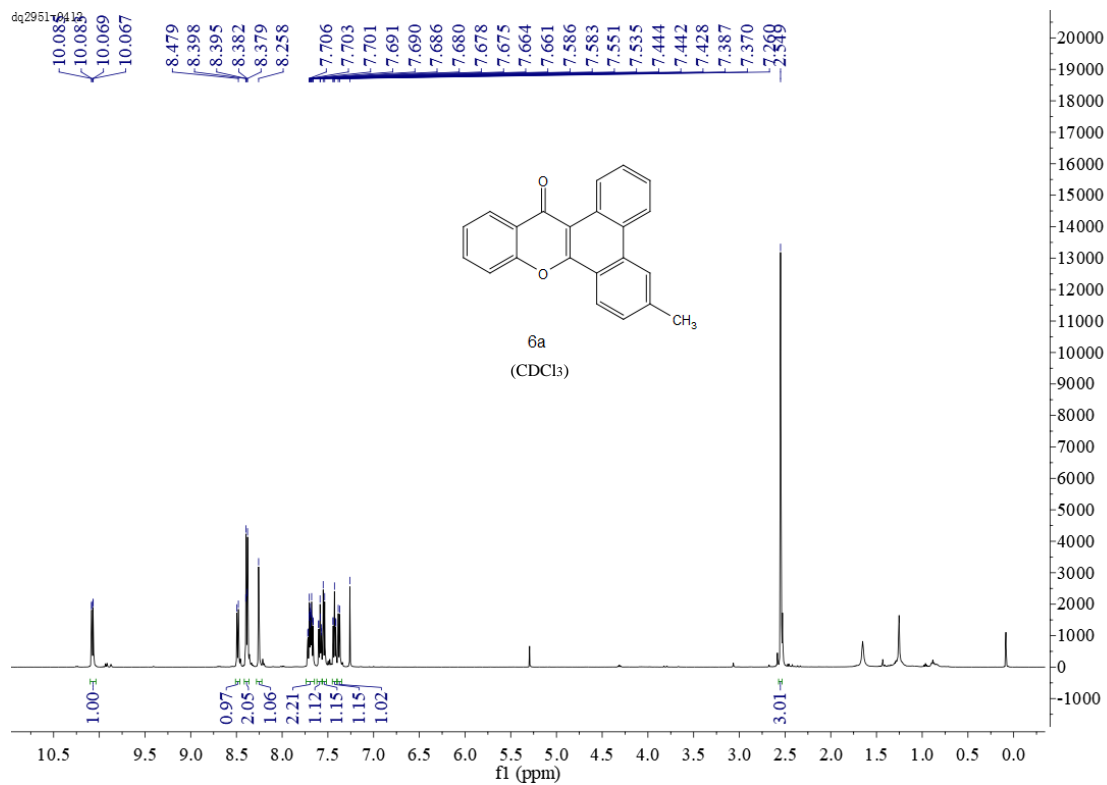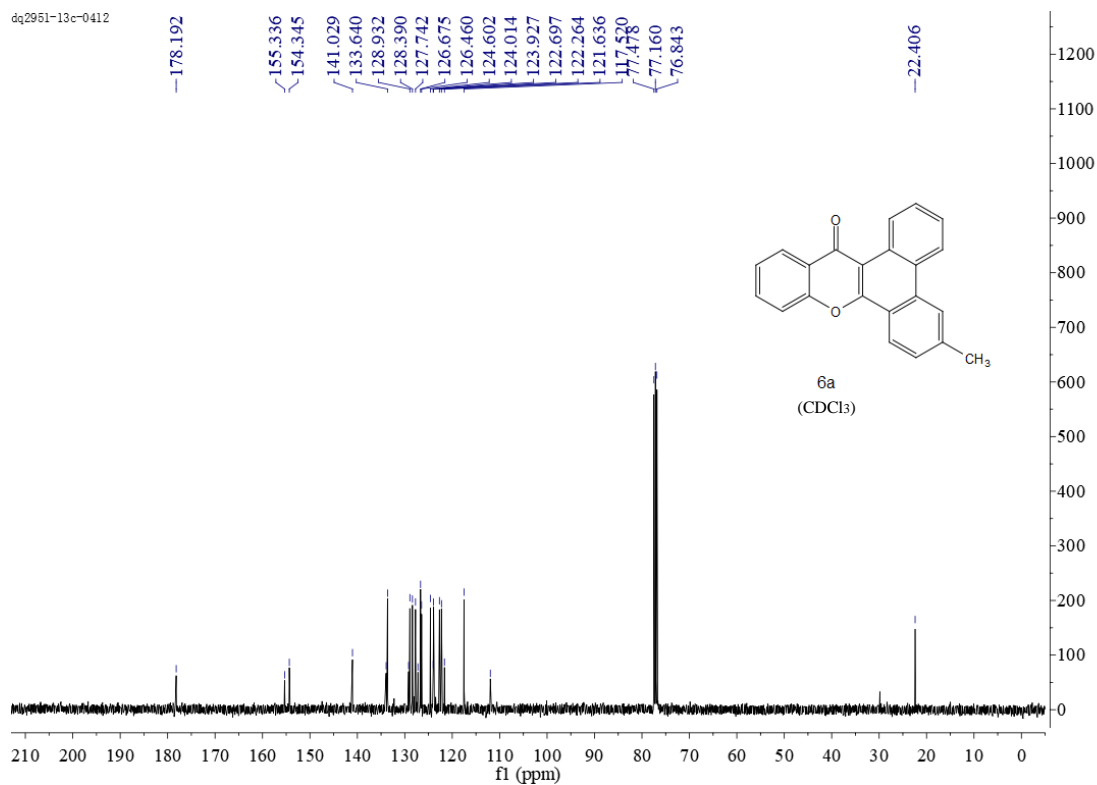

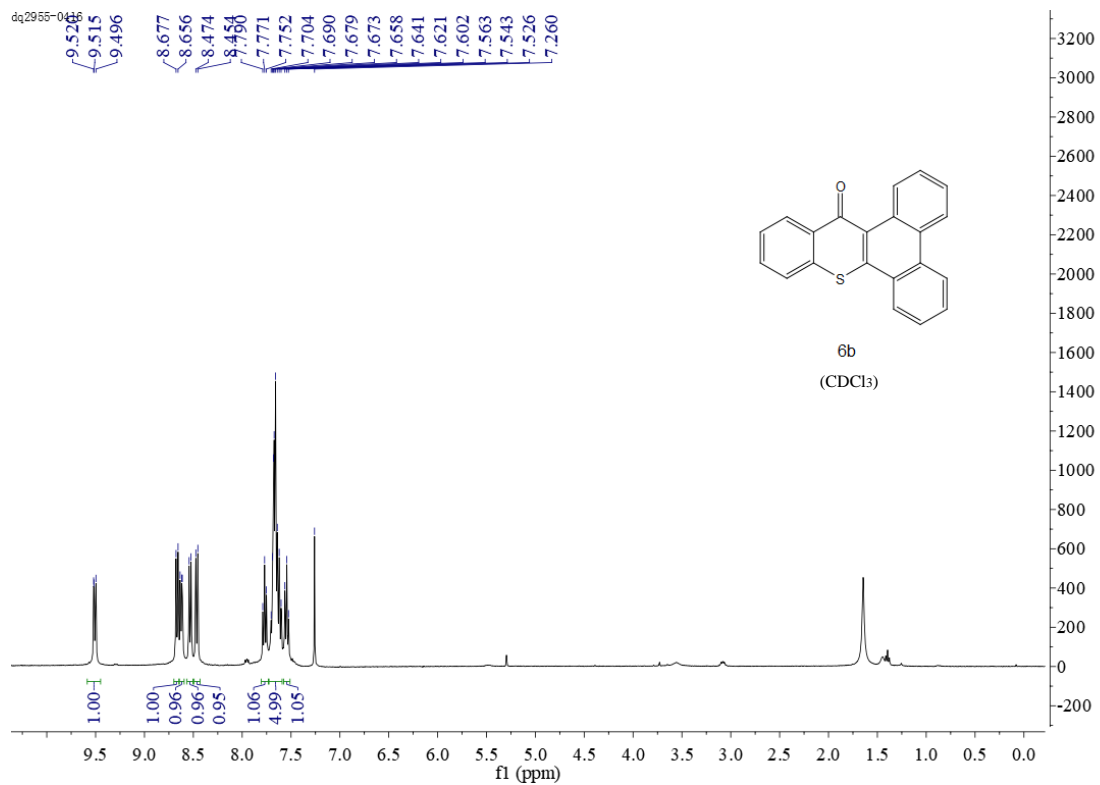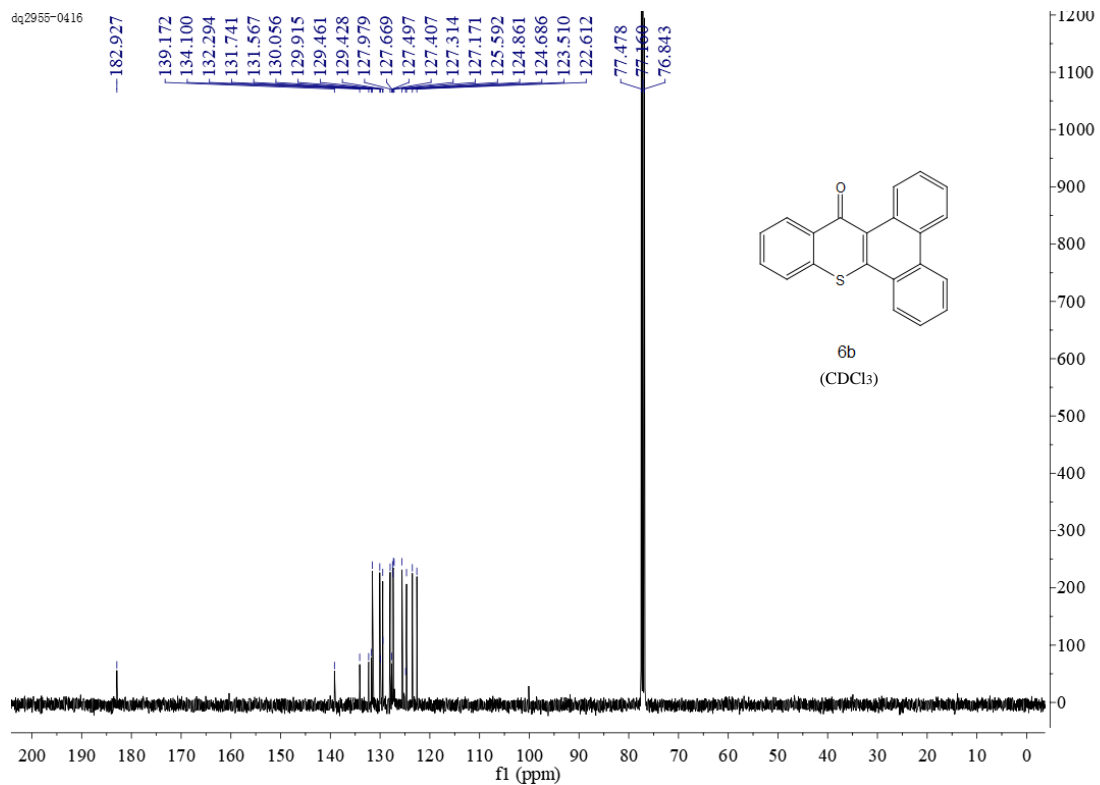



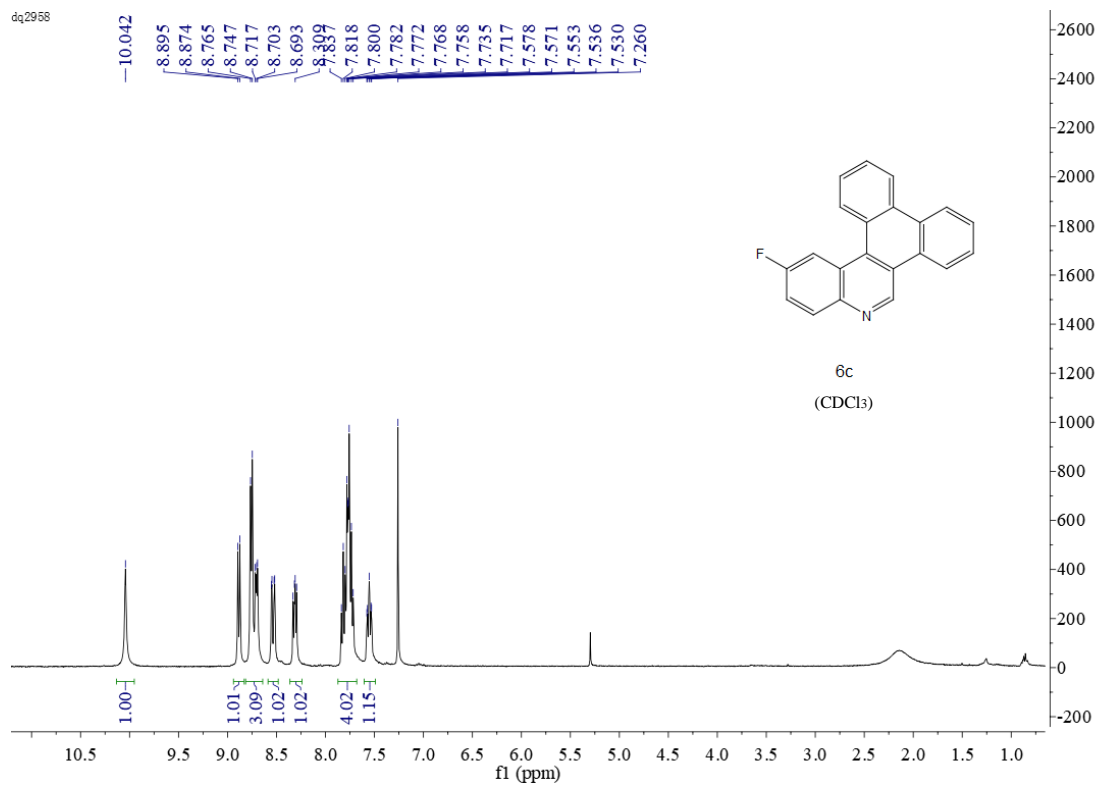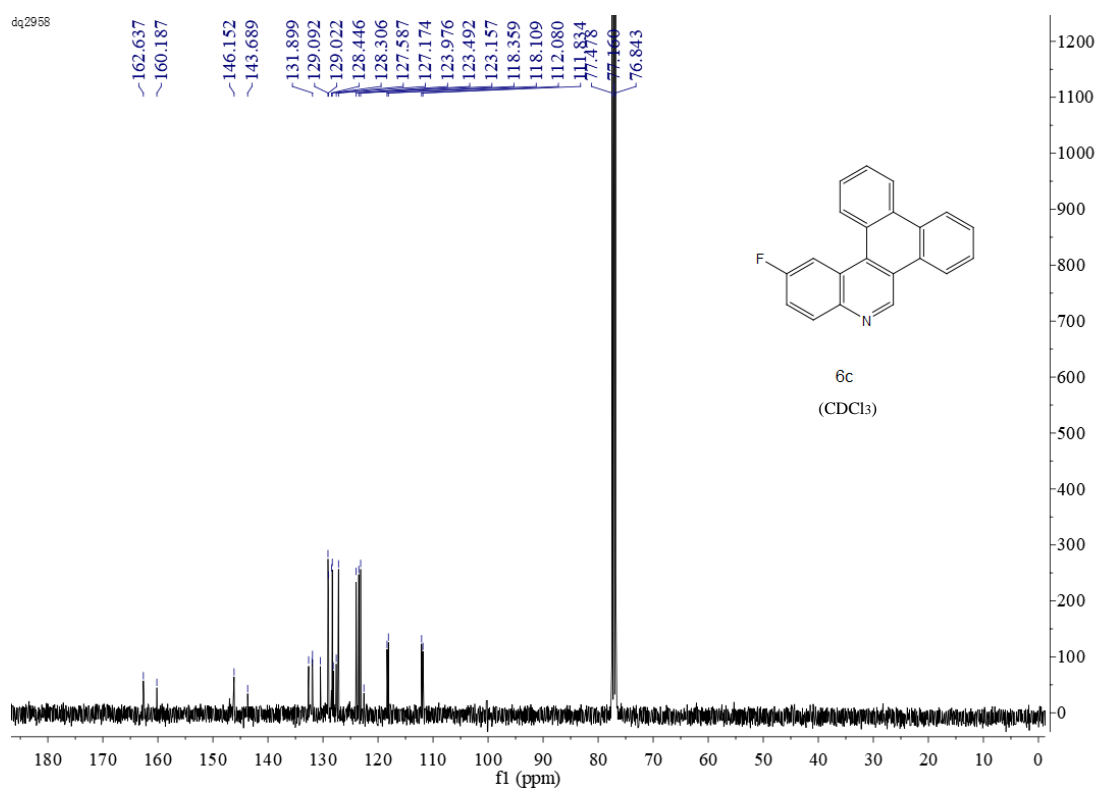

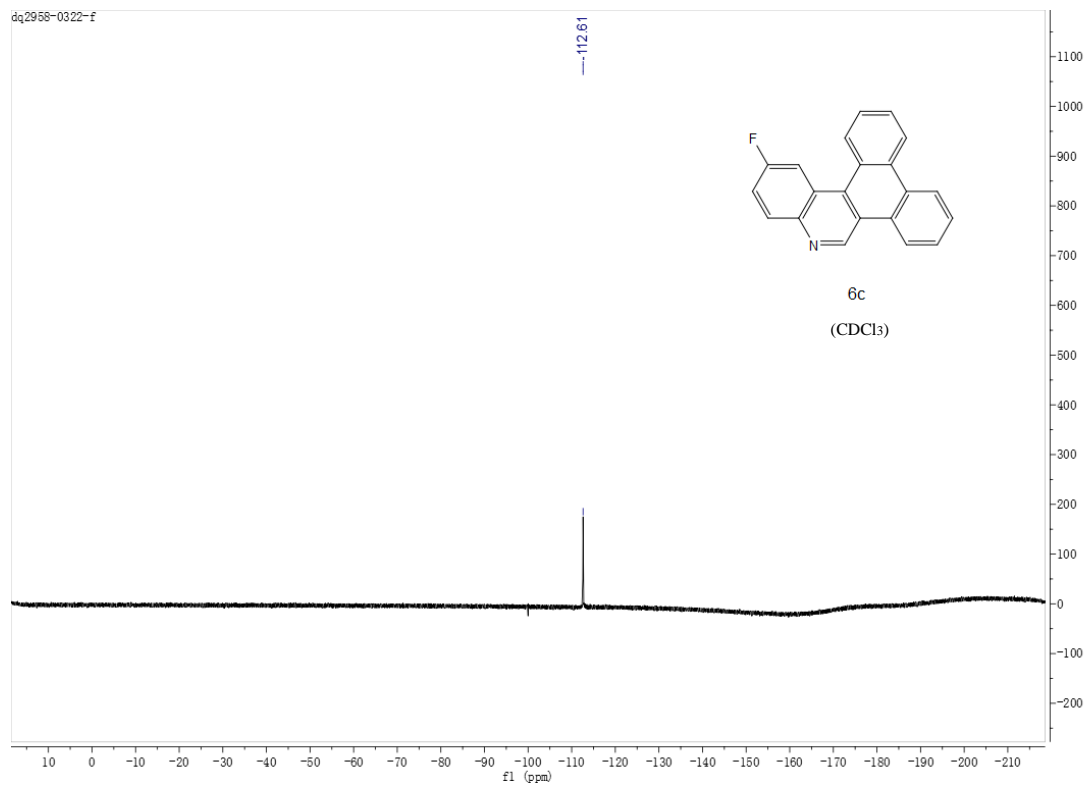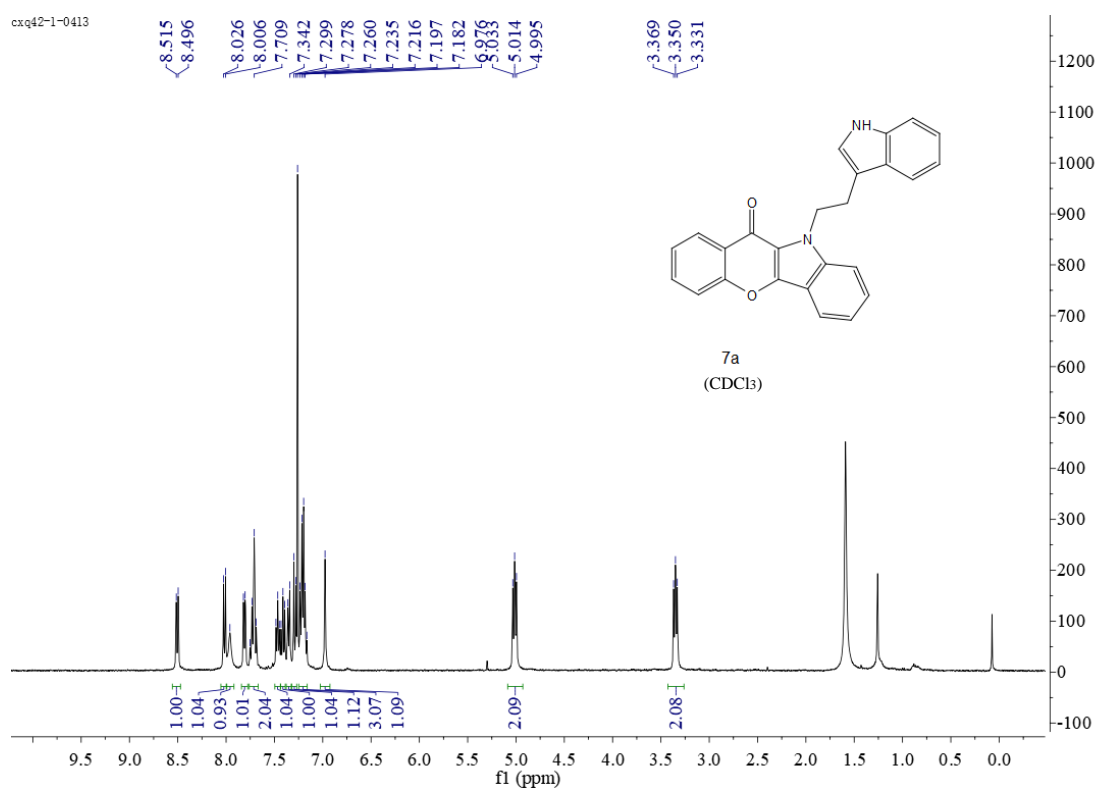

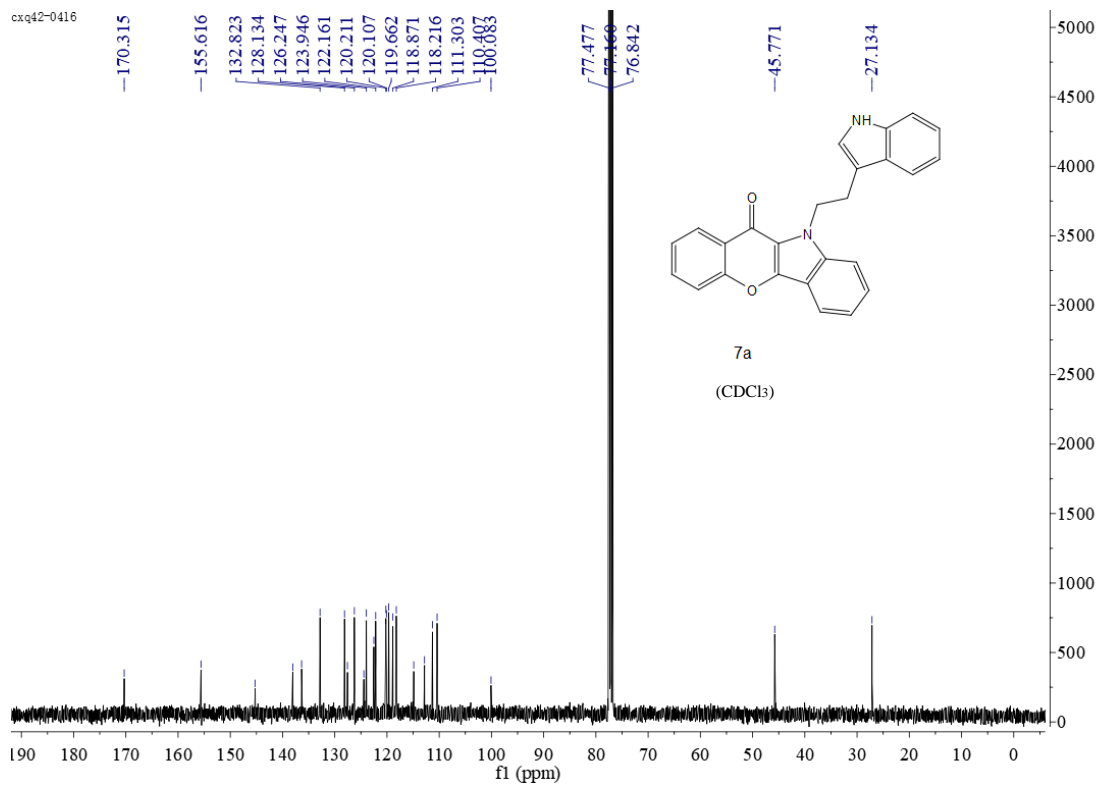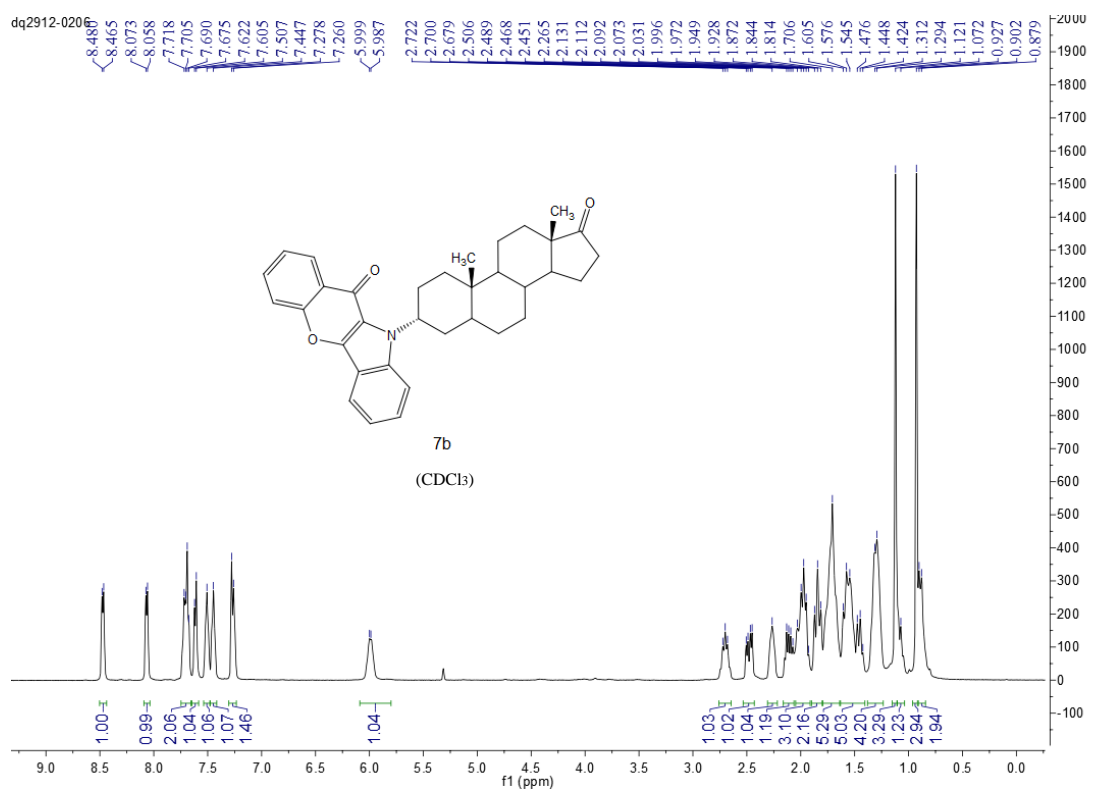

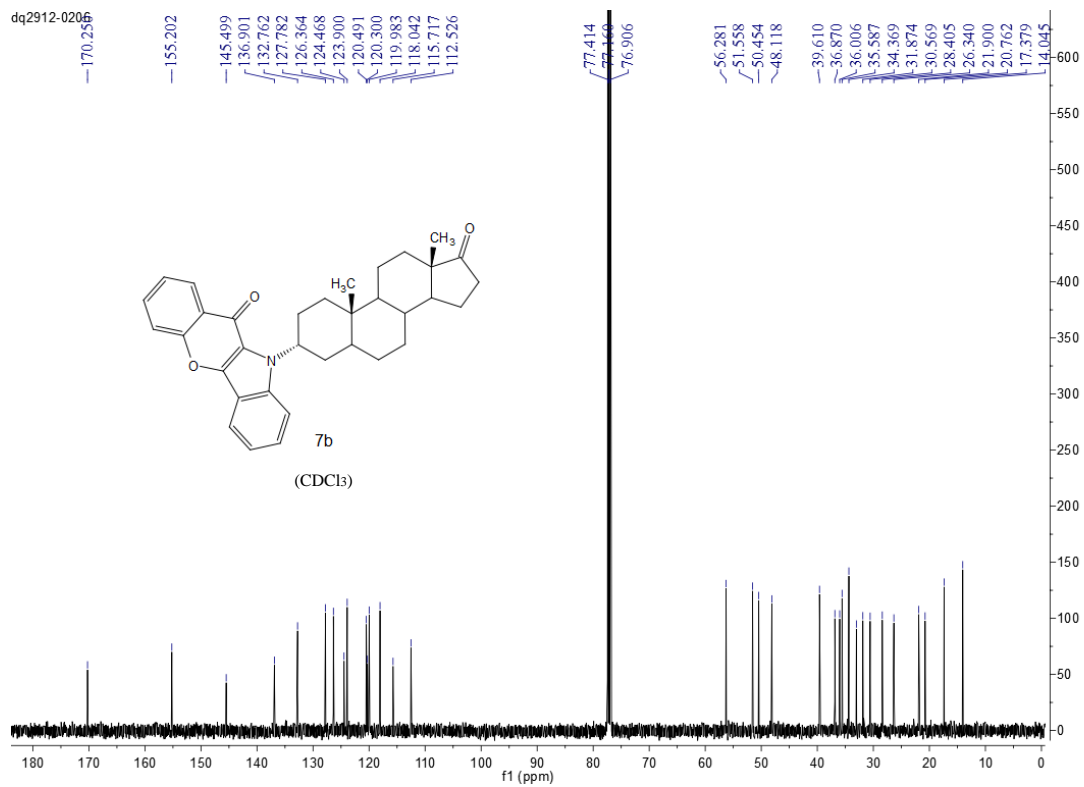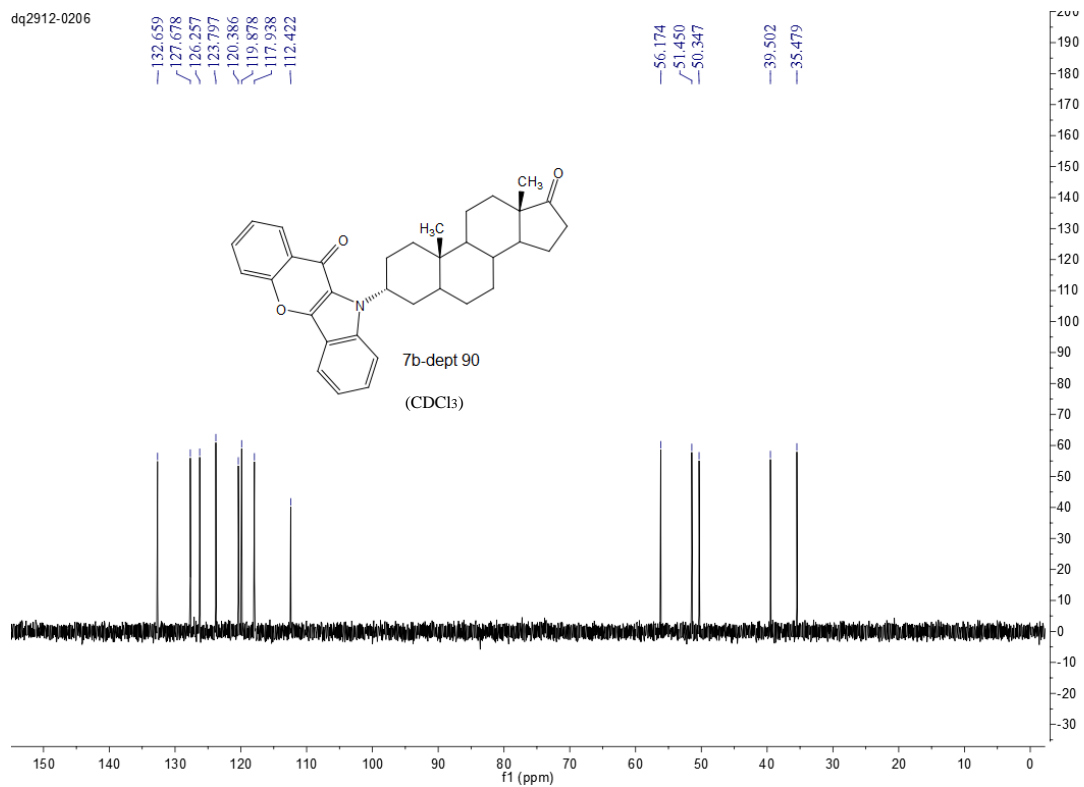

dq2912-0206

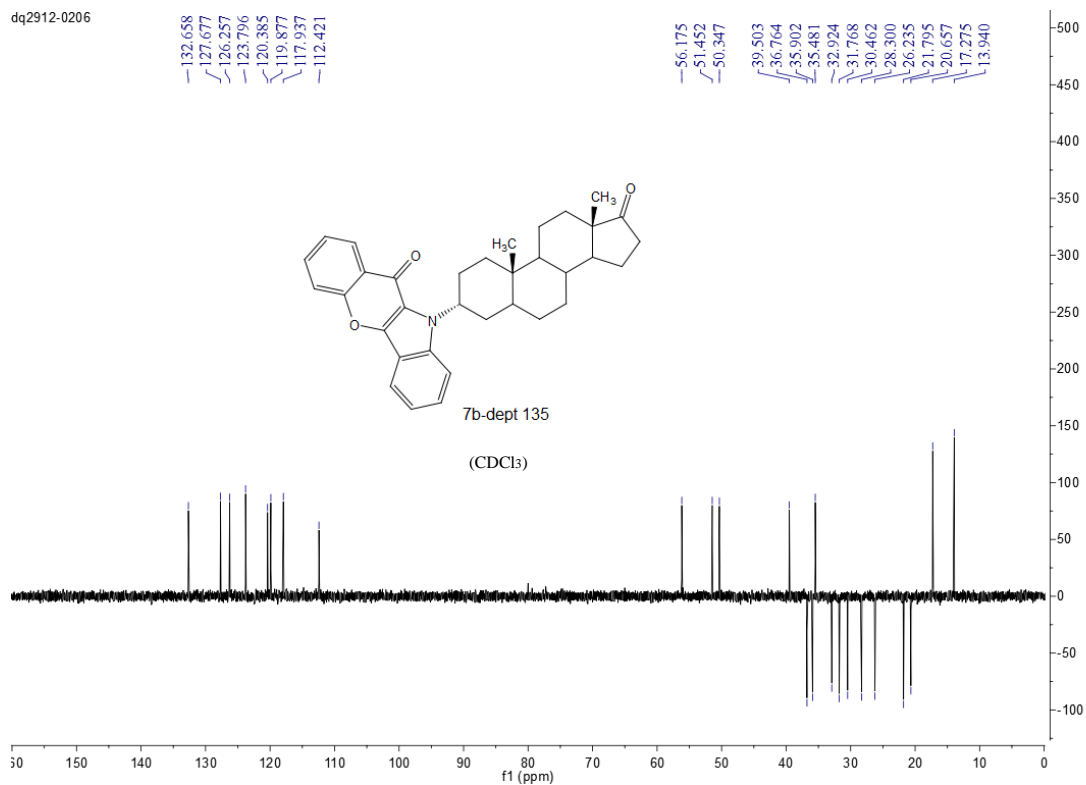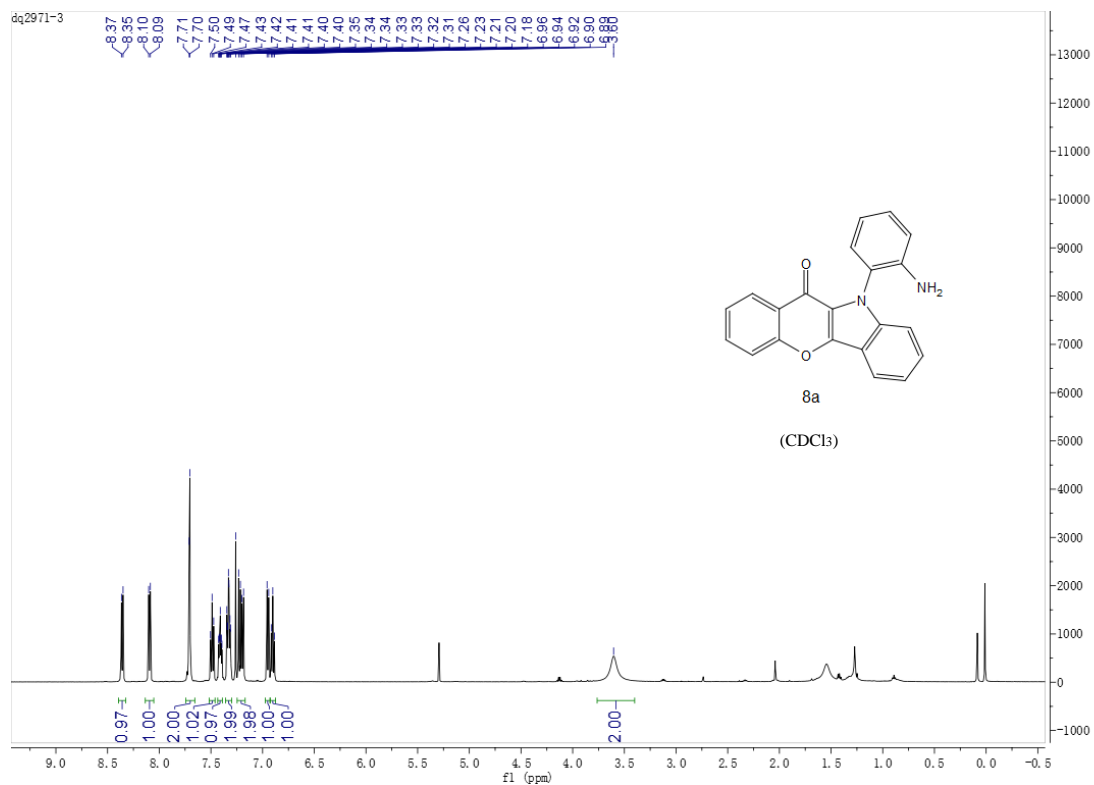

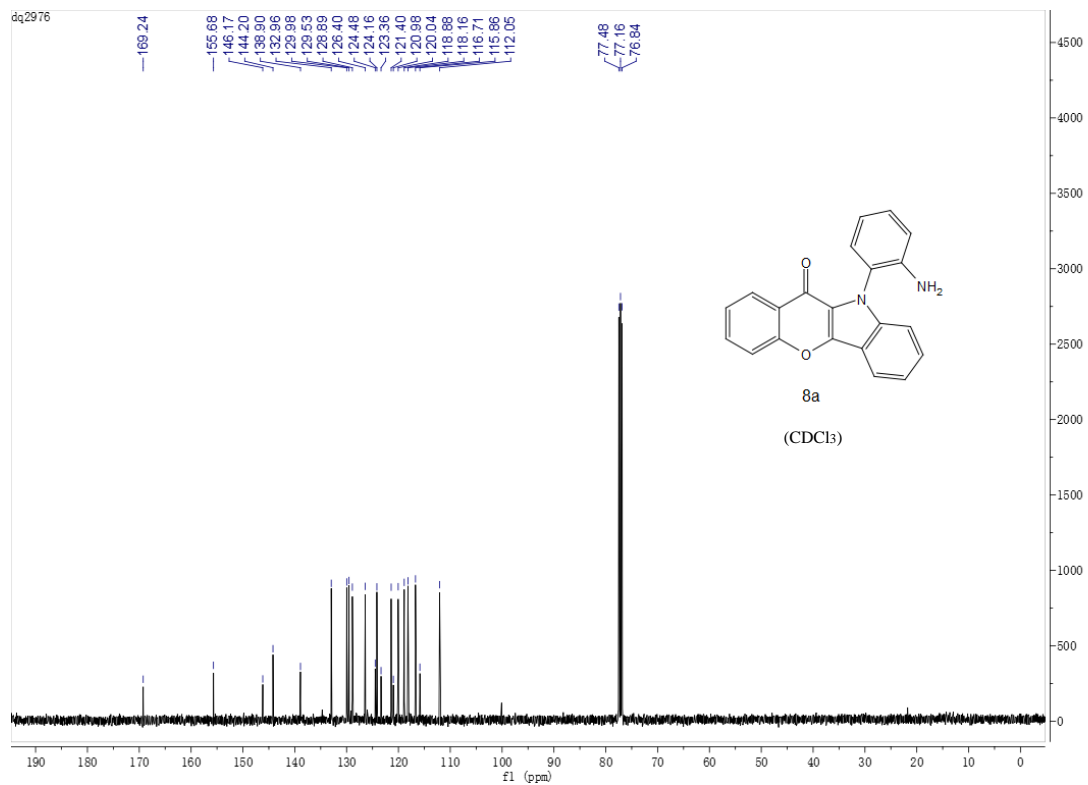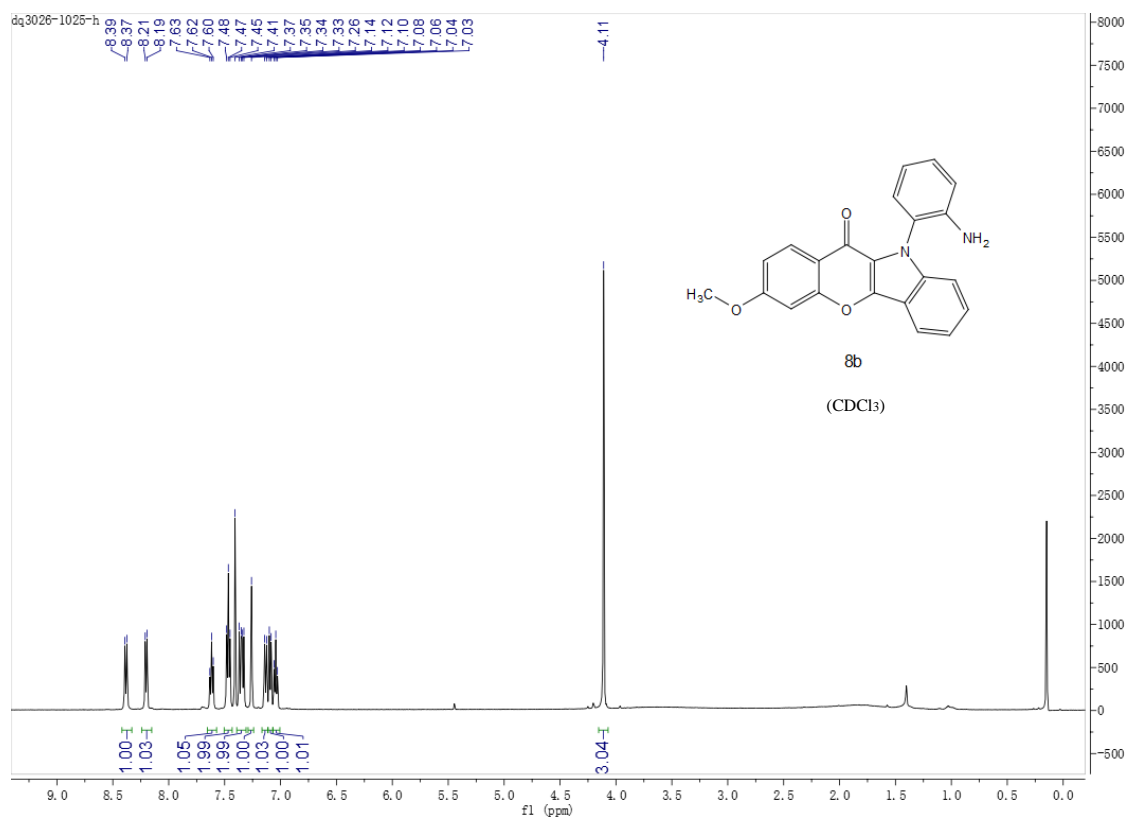

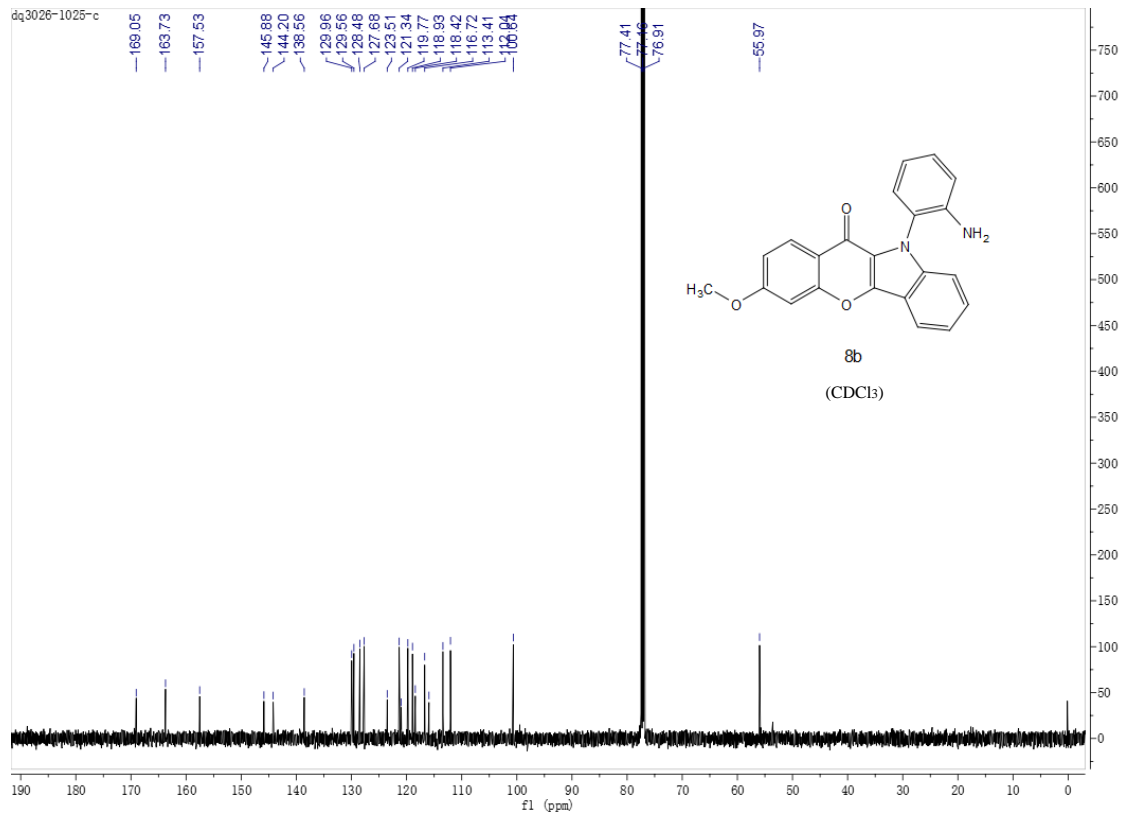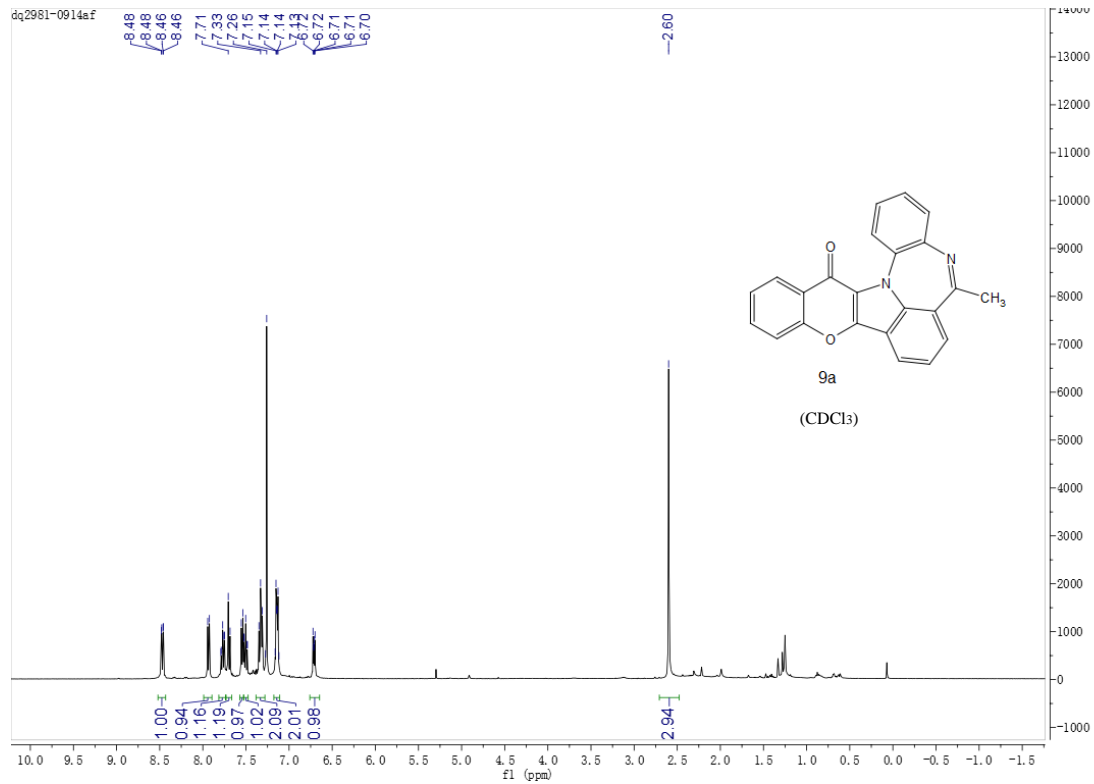

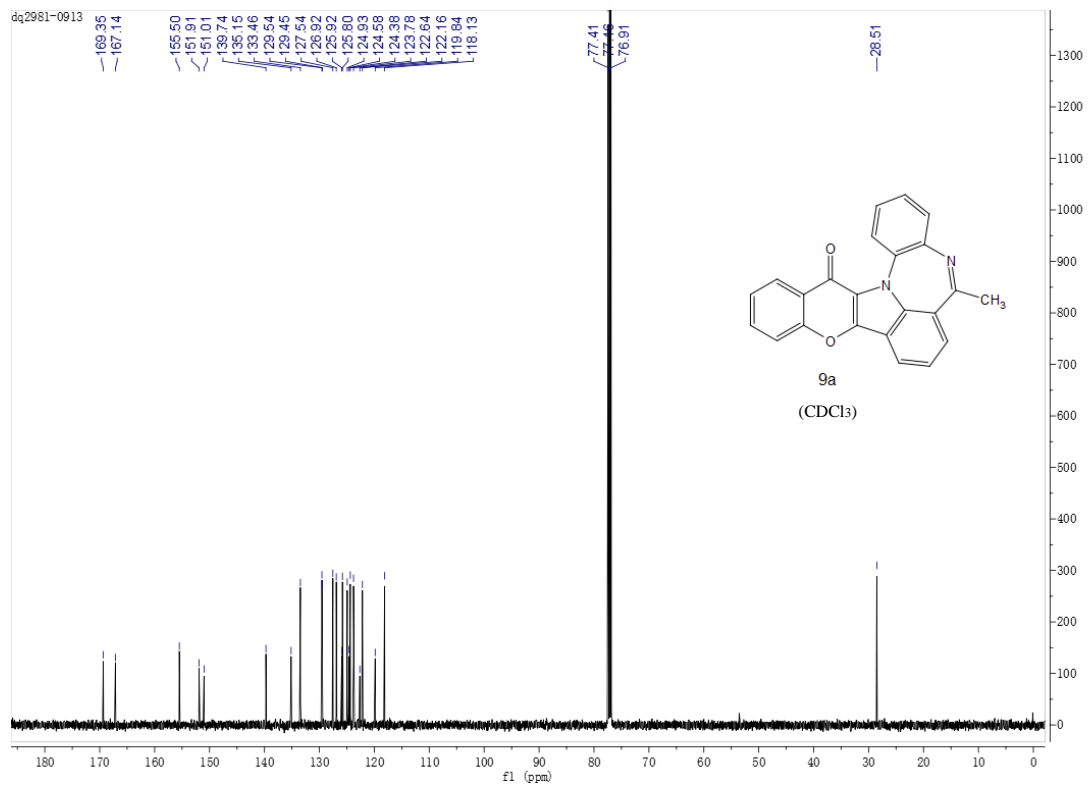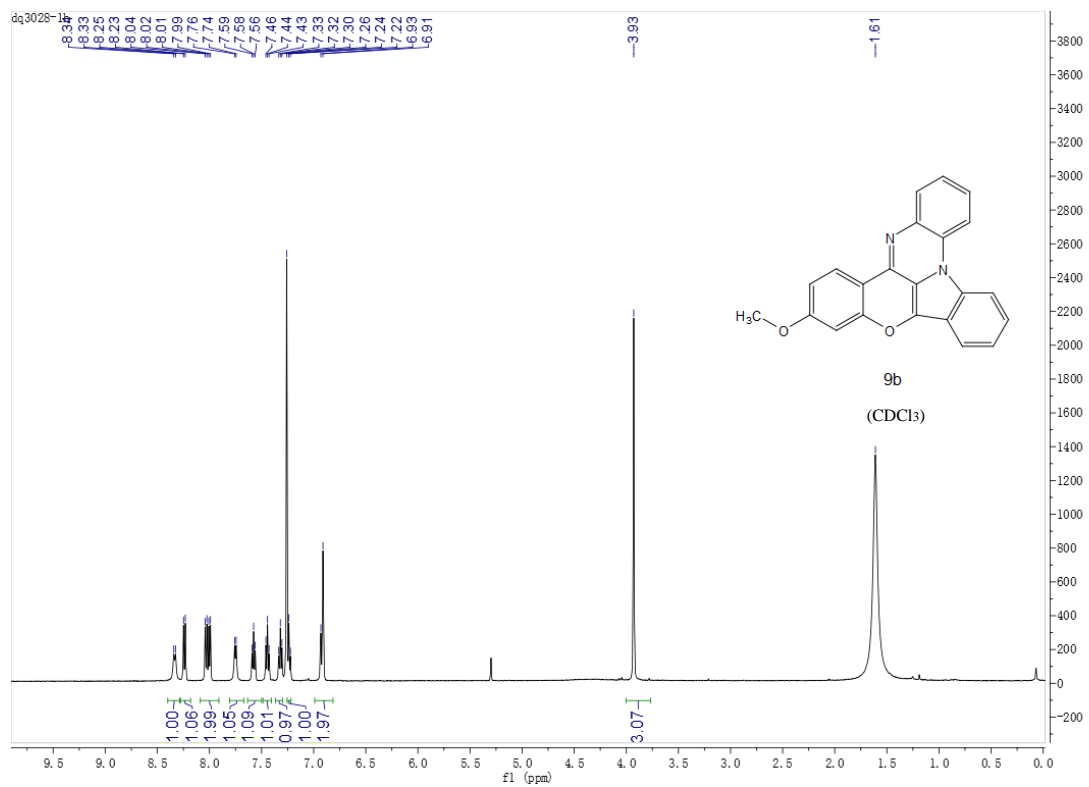



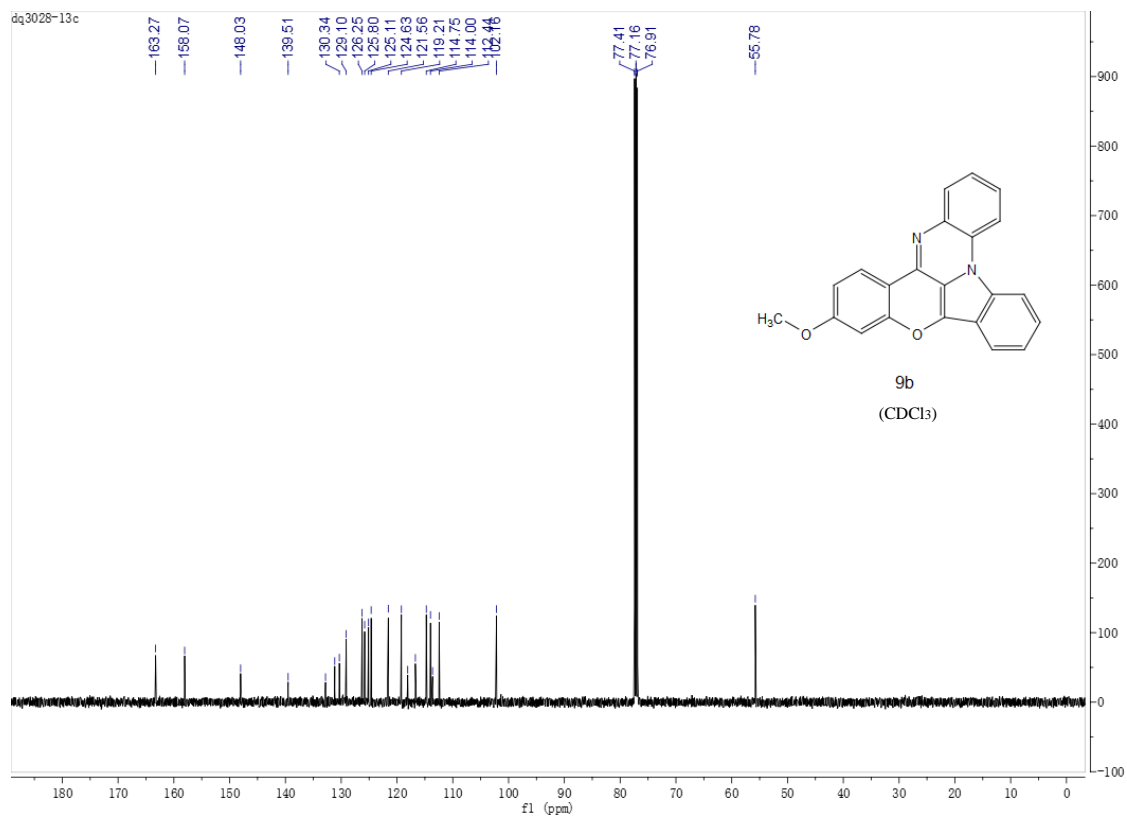

Supplement: RA-009-C9RA07288H-s001.pdf [file RA-009-C9RA07288H-s001.pdf]
